# Supplementary material for: An experimental and computational study of new spiro-barbituric acid pyrazoline scaffolds: restricted rotationvs.annular tautomerism
Source: Royal Society of Chemistry journal article supplement (doi:10.1039/d1nj06208e), 2022-01-01
Supplement: d1nj06208e1.pdf [file d1nj06208e1.pdf]

## Supporting Information

### Experimental and Computational Study of New Spiro-barbituric Acid Pyrazoline Scaffolds: Restricted Rotation vs Annular Tautomerism

Abdolali Alizadeh,<sup>a,\*</sup> Akram Bagherinejad,<sup>a</sup> Jasmine Kayanian,<sup>a</sup> Robert Vianello<sup>b</sup>

<sup>a</sup>Department of Chemistry, Tarbiat Modares University, P.O. Box 14115-175, Tehran, Iran

<sup>b</sup>Laboratory for the Computational Design and Synthesis of Functional Materials, Department of Organic Chemistry and Biochemistry, Ruđer Bošković Institute, Bijenička 54, 10000 Zagreb  
Croatia

aalizadeh@modares.ac.ir

#### The Table of Contents

|                                                                                                                                                                                                         |     |
|---------------------------------------------------------------------------------------------------------------------------------------------------------------------------------------------------------|-----|
| Title, author's name, address, and Table of contents                                                                                                                                                    | S1  |
| <b>Figure 1.</b> HOMO-LUMO Energy Value Analysis                                                                                                                                                        | S2  |
| <b>Table 1.</b> The electronic chemical potential $\mu$ , the chemical hardness $\eta$ , the global electrophilicity ( $\omega$ ) and nucleophilicity (N) of reactants. All data were reported in (eV). | S2  |
| <b>Table 2.</b> Thermodynamic parameters of path A                                                                                                                                                      | S3  |
| <b>Table 3.</b> Computational chemical shift ( <sup>1</sup> H NMR) of <b>4a</b>                                                                                                                         | S4  |
| <b>Table 4.</b> Computational chemical shift ( <sup>1</sup> H NMR) of <b>4A</b>                                                                                                                         | S5  |
| <b>Table 5.</b> Computational chemical shift ( <sup>1</sup> H NMR) of <b>4e</b>                                                                                                                         | S6  |
| <b>Table 6.</b> Computational chemical shift ( <sup>1</sup> H NMR) of <b>4E</b>                                                                                                                         | S7  |
| <b>Table 7.</b> Comparison of two computational methods for calculating the <sup>1</sup> H NMR chemical shift of <b>4a</b> and <b>4A</b>                                                                | S8  |
| <b>Table 8.</b> Comparison of two computational methods for calculating the <sup>1</sup> H NMR chemical shift of <b>4e</b> and <b>4E</b>                                                                | S9  |
| <b>Figure 2.</b> Dihedral Scan around the C <sub>3</sub> -C <sub>21</sub> bond in <b>4a</b> (top) and <b>4e</b> (bottom)                                                                                | S10 |
| <b>Figure 3.</b> Dihedral Scan around the C <sub>45</sub> -C <sub>5</sub> bond in <b>4a</b> (top) and <b>4e</b> (bottom)                                                                                | S11 |
| <b>Figure 4.</b> Comparison of two computational methods for dihedral scan <b>4a</b> and <b>4e</b>                                                                                                      | S12 |
| <b>Figure 5.</b> Two-plot Scan Energy for <b>4E</b>                                                                                                                                                     | S13 |

|                                                                                                                                 |         |
|---------------------------------------------------------------------------------------------------------------------------------|---------|
| <b>Figure 6.</b> Total Energy along IRC for both reactions, propargylic path (top) and carbenoid path (bottom)                  | S14     |
| <b>Figure 7.</b> Experimental XRD patterns for <b>4d</b>                                                                        | S15     |
| <sup>1</sup> H, <sup>13</sup> C NMR, IR, and Mass spectra of compounds <b>3a-3h</b> , and <b>4a-4h</b>                          | S16-S81 |
| Crystallographic Data of <b>3d</b> and ortep diagram of compound <b>3d</b> . The ellipsoid contour of probability level is 50%. | S82     |

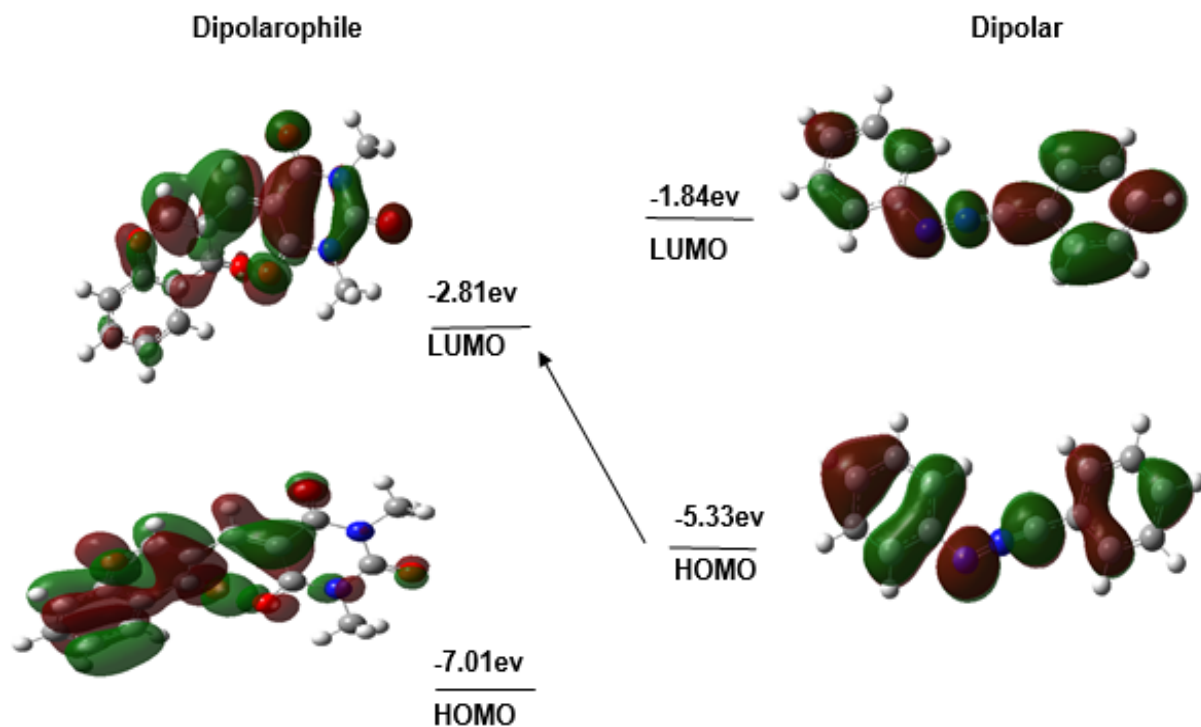

**Figure 1.** HOMO-LUMO Energy Value Analysis

**Table 1.** The electronic chemical potential  $\mu$ , the chemical hardness  $\eta$ , the global electrophilicity ( $\omega$ ) and nucleophilicity (N) of reactants. All data were reported in (eV).

| compound      | $\mu$ | $\eta$ | $\omega$ | N    |
|---------------|-------|--------|----------|------|
| dipolar       | -3.19 | 3.56   | 1.43     | 4.1  |
| dipolarophile | -4.55 | 4.18   | 2.09     | 2.48 |

**Table 2.** Thermodynamic parameters of path A

| Entry       | Electronic Energy (EE) | Zero-point Energy Correction | Thermal Correction to Energy | Thermal Correction to Enthalpy | Thermal Correction to Free Energy | EE + Zero-point Energy | EE + Thermal Energy Correction | EE + Thermal Enthalpy Correction | EE + Thermal Free Energy Correction | Entropy (S) kcal/mol | Dipole Moment debye |
|-------------|------------------------|------------------------------|------------------------------|--------------------------------|-----------------------------------|------------------------|--------------------------------|----------------------------------|-------------------------------------|----------------------|---------------------|
| <b>4a</b>   | -1749.433463           | 0.493027                     | 0.524986                     | 0.525931                       | 0.427284                          | -1748.940436           | -1748.908477                   | -1748.907532                     | -1749.006179                        | 207.619              | 8.87329             |
| <b>4'a</b>  | -1749.419782           | 0.492579                     | 0.524959                     | 0.525903                       | 0.426177                          | -1748.927203           | -1748.894823                   | -1748.893879                     | -1748.993605                        | 209.891              | 4.6839              |
| <b>TS4a</b> | -1749.332209           | 0.486124                     | 0.518202                     | 0.519146                       | 0.419542                          | -1748.846085           | -1748.814007                   | -1748.813063                     | -1748.912667                        | 209.634              | 4.82231             |
| <b>4e</b>   | -2209.044845           | 0.482914                     | 0.516273                     | 0.517217                       | 0.415216                          | -2208.561931           | -2208.528572                   | -2208.527628                     | -2208.629629                        | 214.68               | 11.45393            |
| <b>4'e</b>  | -2209.040014           | 0.482319                     | 0.516158                     | 0.517103                       | 0.413889                          | -2208.557695           | -2208.523856                   | -2208.522911                     | -2208.626125                        | 217.232              | 6.73833             |
| <b>TS4e</b> | -2208.952174           | 0.475903                     | 0.509406                     | 0.510351                       | 0.407317                          | -2208.476271           | -2208.442768                   | -2208.441823                     | -2208.544857                        | 216.853              | 6.6887              |
| <b>4A</b>   | -1749.422745           | 0.49393                      | 0.525749                     | 0.526693                       | 0.427967                          | -1748.928815           | -1748.896996                   | -1748.896052                     | -1748.994778                        | 207.785              | 4.42163             |
| <b>4'A</b>  | -1749.417125           | 0.493548                     | 0.525693                     | 0.526637                       | 0.427392                          | -1748.923577           | -1748.891432                   | -1748.890488                     | -1748.989733                        | 208.878              | 9.21658             |
| <b>TS4A</b> | -1749.334955           | 0.486733                     | 0.518326                     | 0.51927                        | 0.422706                          | -1748.848222           | -1748.816629                   | -1748.815685                     | -1748.912249                        | 203.236              | 5.61159             |
| <b>4E</b>   | -2209.043188           | 0.484133                     | 0.517192                     | 0.518136                       | 0.416971                          | -2208.559055           | -2208.525996                   | -2208.525052                     | -2208.626217                        | 212.919              | 6.67976             |
| <b>4'E</b>  | -2209.035999           | 0.483615                     | 0.517067                     | 0.518011                       | 0.415748                          | -2208.552384           | -2208.518932                   | -2208.517988                     | -2208.620251                        | 215.23               | 9.61913             |
| <b>TS4E</b> | -2208.953495           | 0.476632                     | 0.509698                     | 0.510643                       | 0.409409                          | -2208.476863           | -2208.443797                   | -2208.442852                     | -2208.544086                        | 213.065              | 3.95179             |

**Table 3.** Computational chemical shift ( $^1\text{H}$  NMR) of **4a**

|                                                                                                    |        |         |         |
|----------------------------------------------------------------------------------------------------|--------|---------|---------|
| 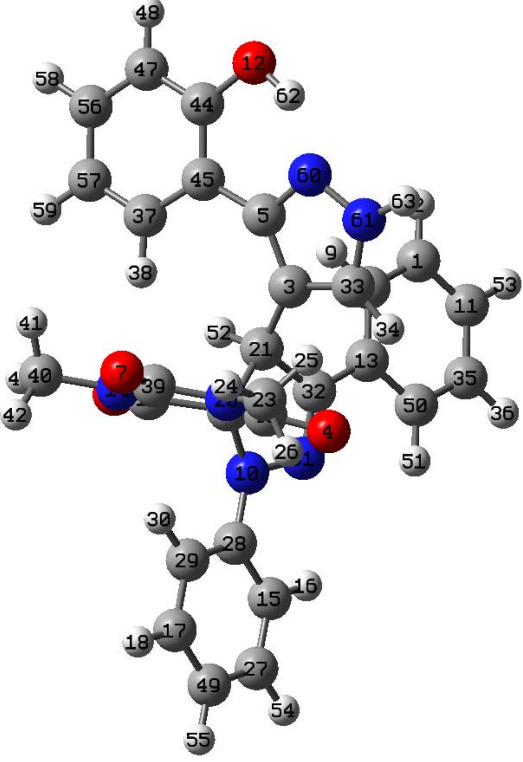<br><b>4a</b>    | 62-H   | 14.8050 | 6.2775  |
|                                                                                                    | 63-H   | 9.8859  | 13.1343 |
|                                                                                                    | 51-H   | 8.7347  | 8.7992  |
|                                                                                                    | 16-H   | 8.0944  | 8.1108  |
|                                                                                                    | 38-H   | 8.0059  | 7.9566  |
|                                                                                                    | 34-H   | 7.7802  | 7.6759  |
|                                                                                                    | 54-H   | 7.7011  | 7.7040  |
|                                                                                                    | 36-H   | 7.6962  | 7.7259  |
|                                                                                                    | 58-H   | 7.5947  | 7.5920  |
|                                                                                                    | 53-H   | 7.5484  | 7.5399  |
|                                                                                                    | 18-H   | 7.4068  | 7.3924  |
|                                                                                                    | 48-H   | 7.3401  | 7.1887  |
|                                                                                                    | 2-H    | 7.1576  | 7.1738  |
|                                                                                                    | 59-H   | 7.1313  | 7.3774  |
|                                                                                                    | 55-H   | 7.1261  | 7.1161  |
|                                                                                                    | 9-H    | 6.8491  | 7.0180  |
|                                                                                                    | 52-H   | 6.7202  | 6.5101  |
|                                                                                                    | 30-H   | 6.3319  | 6.2122  |
|                                                                                                    | 43-H   | 4.7508  | 4.6555  |
|                                                                                                    | 24-H   | 4.1707  | 4.0821  |
| 42-H                                                                                               | 3.1371 | 3.1129  |         |
| 26-H                                                                                               | 3.0032 | 3.0378  |         |
| 41-H                                                                                               | 2.9756 | 2.8484  |         |
| 25-H                                                                                               | 2.7179 | 2.5907  |         |
| <br><b>4'a</b> |        |         |         |
|                                                                                                    |        |         |         |
|                                                                                                    |        |         |         |
|                                                                                                    |        |         |         |
|                                                                                                    |        |         |         |
|                                                                                                    |        |         |         |
|                                                                                                    |        |         |         |
|                                                                                                    |        |         |         |
|                                                                                                    |        |         |         |
|                                                                                                    |        |         |         |
|                                                                                                    |        |         |         |
|                                                                                                    |        |         |         |
|                                                                                                    |        |         |         |
|                                                                                                    |        |         |         |
|                                                                                                    |        |         |         |
|                                                                                                    |        |         |         |
|                                                                                                    |        |         |         |
|                                                                                                    |        |         |         |
|                                                                                                    |        |         |         |
|                                                                                                    |        |         |         |

**Table 4.** Computational chemical shift ( $^1\text{H}$  NMR) of **4A**

|                                                                                                                                 |        |         |         |                                                                                                                                    |
|---------------------------------------------------------------------------------------------------------------------------------|--------|---------|---------|------------------------------------------------------------------------------------------------------------------------------------|
| 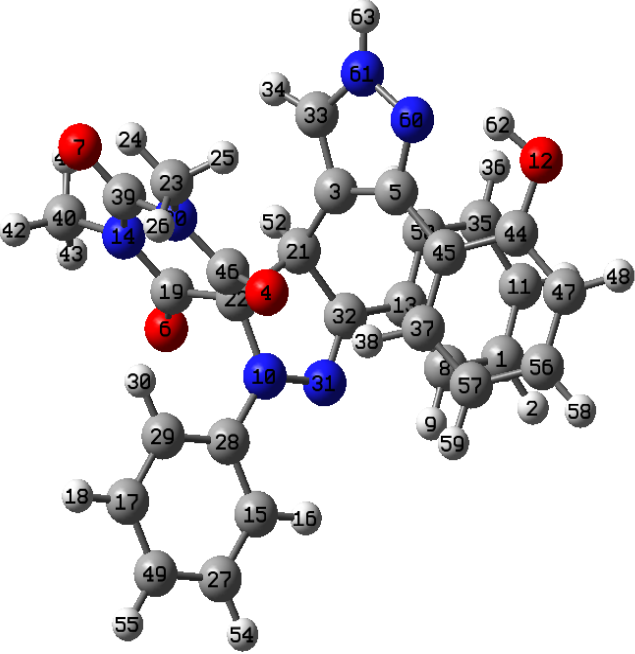 <p style="text-align: center;"><b>4A</b></p> | 62-H   | 13.3083 | 5.5512  |  <p style="text-align: center;"><b>4'A</b></p> |
|                                                                                                                                 | 63-H   | 10.1274 | 11.6125 |                                                                                                                                    |
|                                                                                                                                 | 38-H   | 8.7834  | 8.8749  |                                                                                                                                    |
|                                                                                                                                 | 9-H    | 8.4304  | 8.3599  |                                                                                                                                    |
|                                                                                                                                 | 16-H   | 8.1407  | 8.1261  |                                                                                                                                    |
|                                                                                                                                 | 34-H   | 7.9800  | 7.9211  |                                                                                                                                    |
|                                                                                                                                 | 54-H   | 7.7453  | 7.7408  |                                                                                                                                    |
|                                                                                                                                 | 2-H    | 7.4598  | 7.4386  |                                                                                                                                    |
|                                                                                                                                 | 53-H   | 7.4032  | 7.4409  |                                                                                                                                    |
|                                                                                                                                 | 18-H   | 7.3932  | 7.3990  |                                                                                                                                    |
|                                                                                                                                 | 58-H   | 7.3621  | 7.3843  |                                                                                                                                    |
|                                                                                                                                 | 36-H   | 7.1965  | 7.2452  |                                                                                                                                    |
|                                                                                                                                 | 55-H   | 7.1413  | 7.1418  |                                                                                                                                    |
|                                                                                                                                 | 51-H   | 7.0545  | 7.0844  |                                                                                                                                    |
|                                                                                                                                 | 59-H   | 6.9927  | 7.1589  |                                                                                                                                    |
|                                                                                                                                 | 48-H   | 6.8578  | 6.7360  |                                                                                                                                    |
|                                                                                                                                 | 30-H   | 6.0272  | 6.0222  |                                                                                                                                    |
|                                                                                                                                 | 52-H   | 5.6520  | 5.6377  |                                                                                                                                    |
|                                                                                                                                 | 43-H   | 4.4572  | 4.4411  |                                                                                                                                    |
|                                                                                                                                 | 25-H   | 4.0818  | 4.0549  |                                                                                                                                    |
| 41-H                                                                                                                            | 3.2104 | 3.2372  |         |                                                                                                                                    |
| 42-H                                                                                                                            | 3.0725 | 3.0689  |         |                                                                                                                                    |
| 26-H                                                                                                                            | 2.9434 | 2.9992  |         |                                                                                                                                    |
| 24-H                                                                                                                            | 2.8442 | 2.7908  |         |                                                                                                                                    |

**Table 5.** Computational chemical shift ( $^1\text{H}$  NMR) of **4e**

|                                                                                                                                 |        |         |         |                                                                                                                                    |
|---------------------------------------------------------------------------------------------------------------------------------|--------|---------|---------|------------------------------------------------------------------------------------------------------------------------------------|
| 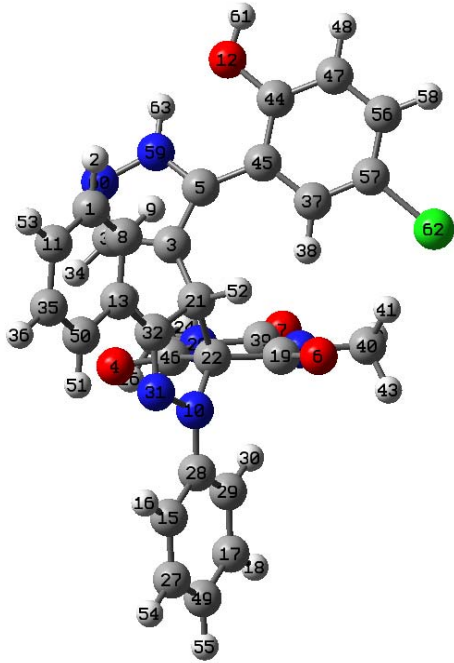 <p style="text-align: center;"><b>4e</b></p> | 61-H   | 15.1722 | 6.3939  |  <p style="text-align: center;"><b>4'e</b></p> |
|                                                                                                                                 | 63-H   | 9.8390  | 13.0372 |                                                                                                                                    |
|                                                                                                                                 | 38-H   | 7.8098  | 7.7785  |                                                                                                                                    |
|                                                                                                                                 | 9-H    | 7.0001  | 7.0250  |                                                                                                                                    |
|                                                                                                                                 | 16-H   | 8.0821  | 8.1015  |                                                                                                                                    |
|                                                                                                                                 | 34-H   | 7.6075  | 7.6335  |                                                                                                                                    |
|                                                                                                                                 | 54-H   | 7.7026  | 7.7126  |                                                                                                                                    |
|                                                                                                                                 | 2-H    | 7.2810  | 7.2565  |                                                                                                                                    |
|                                                                                                                                 | 53-H   | 7.5634  | 7.5632  |                                                                                                                                    |
|                                                                                                                                 | 18-H   | 7.4037  | 7.4083  |                                                                                                                                    |
|                                                                                                                                 | 36-H   | 7.7244  | 7.7126  |                                                                                                                                    |
|                                                                                                                                 | 58-H   | 7.4403  | 7.4410  |                                                                                                                                    |
|                                                                                                                                 | 55-H   | 7.1197  | 7.1121  |                                                                                                                                    |
|                                                                                                                                 | 51-H   | 8.7709  | 8.8158  |                                                                                                                                    |
|                                                                                                                                 | 48-H   | 7.2868  | 7.1410  |                                                                                                                                    |
|                                                                                                                                 | 30-H   | 6.2516  | 6.2223  |                                                                                                                                    |
|                                                                                                                                 | 52-H   | 6.5326  | 6.3875  |                                                                                                                                    |
| 43-H                                                                                                                            | 3.2480 | 3.2160  |         |                                                                                                                                    |
| 25-H                                                                                                                            | 2.5420 | 2.5040  |         |                                                                                                                                    |
| 41-H                                                                                                                            | 3.7384 | 3.7433  |         |                                                                                                                                    |
| 42-H                                                                                                                            | 4.4474 | 4.4272  |         |                                                                                                                                    |
| 26-H                                                                                                                            | 2.8970 | 2.9613  |         |                                                                                                                                    |
| 24-H                                                                                                                            | 4.0745 | 4.0368  |         |                                                                                                                                    |

**Table 6.** Computational chemical shift ( $^1\text{H}$  NMR) of **4E**

|                                                                                                                                 |        |         |         |                                                                                                                                    |
|---------------------------------------------------------------------------------------------------------------------------------|--------|---------|---------|------------------------------------------------------------------------------------------------------------------------------------|
| 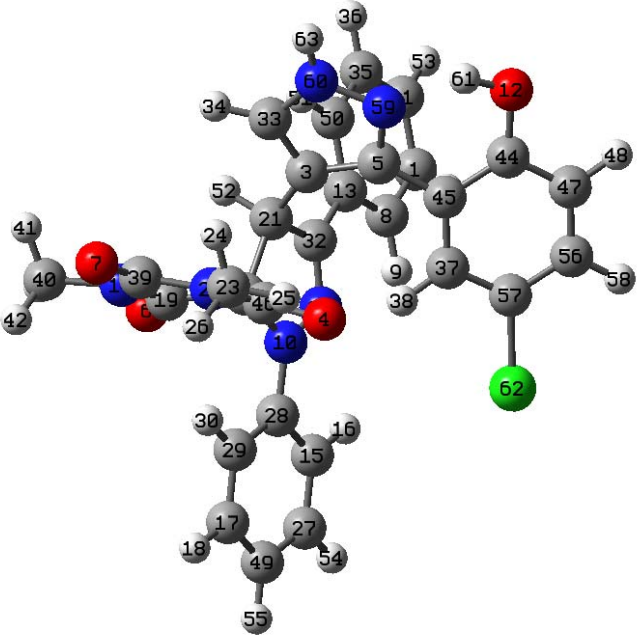 <p style="text-align: center;"><b>4E</b></p> | 61-H   | 13.5196 | 5.5628  |  <p style="text-align: center;"><b>4'E</b></p> |
|                                                                                                                                 | 63-H   | 10.2004 | 11.2481 |                                                                                                                                    |
|                                                                                                                                 | 38-H   | 8.8572  | 9.07460 |                                                                                                                                    |
|                                                                                                                                 | 9-H    | 8.4905  | 8.3799  |                                                                                                                                    |
|                                                                                                                                 | 16-H   | 8.2418  | 8.1841  |                                                                                                                                    |
|                                                                                                                                 | 34-H   | 7.9933  | 7.9279  |                                                                                                                                    |
|                                                                                                                                 | 54-H   | 7.7242  | 7.7189  |                                                                                                                                    |
|                                                                                                                                 | 2-H    | 7.5090  | 7.4910  |                                                                                                                                    |
|                                                                                                                                 | 53-H   | 7.4376  | 7.4642  |                                                                                                                                    |
|                                                                                                                                 | 18-H   | 7.3825  | 7.3735  |                                                                                                                                    |
|                                                                                                                                 | 36-H   | 7.2500  | 7.2573  |                                                                                                                                    |
|                                                                                                                                 | 58-H   | 7.1836  | 7.2647  |                                                                                                                                    |
|                                                                                                                                 | 55-H   | 7.1199  | 7.1005  |                                                                                                                                    |
|                                                                                                                                 | 51-H   | 6.9957  | 7.0638  |                                                                                                                                    |
|                                                                                                                                 | 48-H   | 6.8018  | 6.6572  |                                                                                                                                    |
|                                                                                                                                 | 30-H   | 6.0017  | 5.9907  |                                                                                                                                    |
|                                                                                                                                 | 52-H   | 5.7104  | 5.6929  |                                                                                                                                    |
|                                                                                                                                 | 43-H   | 4.4427  | 4.4348  |                                                                                                                                    |
|                                                                                                                                 | 25-H   | 4.0943  | 4.0614  |                                                                                                                                    |
|                                                                                                                                 | 41-H   | 3.2442  | 3.2810  |                                                                                                                                    |
| 42-H                                                                                                                            | 3.0587 | 3.0746  |         |                                                                                                                                    |
| 26-H                                                                                                                            | 2.9271 | 2.9720  |         |                                                                                                                                    |
| 24-H                                                                                                                            | 2.7941 | 2.7808  |         |                                                                                                                                    |

**Table 7.** Comparison of two computational methods for calculating the  $^1\text{H}$  NMR chemical shift of **4e** and **4E**

Red = B3LYP-D3/6-311++g(d,p)

Blue = B3LYP/6-311++g(d,p)

|                                                                                                                                   |        |        |        |        |        |
|-----------------------------------------------------------------------------------------------------------------------------------|--------|--------|--------|--------|--------|
| 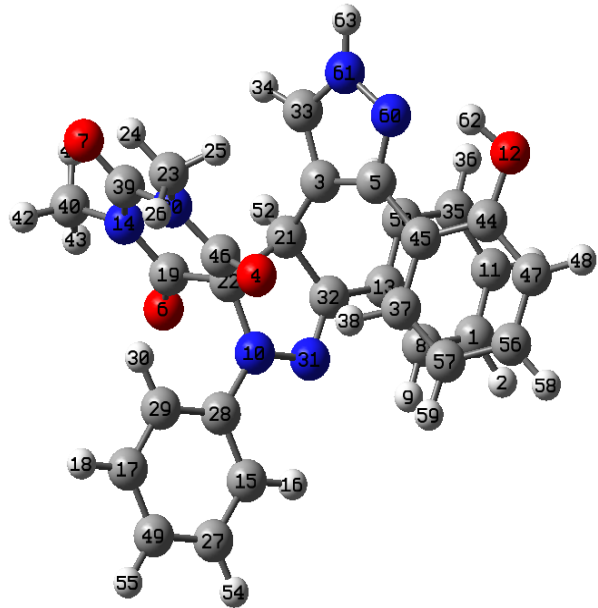 <p style="text-align: center;"><b>4A</b></p>   | 10.209 | 13.308 | 62-H   | 14.805 | 10.209 |
|                                                                                                                                   | 9.632  | 10.127 | 63-H   | 9.8859 | 9.636  |
|                                                                                                                                   | 8.404  | 8.783  | 38-H   | 8.7347 | 8.404  |
|                                                                                                                                   | 8.124  | 8.430  | 9-H    | 8.0944 | 8.124  |
|                                                                                                                                   | 7.686  | 8.140  | 16-H   | 8.0059 | 7.686  |
|                                                                                                                                   | 7.631  | 7.980  | 34-H   | 7.7802 | 7.631  |
|                                                                                                                                   | 7.620  | 7.745  | 54-H   | 7.7011 | 7.620  |
|                                                                                                                                   | 7.467  | 7.459  | 2-H    | 7.6962 | 7.467  |
|                                                                                                                                   | 7.437  | 7.403  | 53-H   | 7.5947 | 7.437  |
|                                                                                                                                   | 7.397  | 7.393  | 18-H   | 7.5484 | 7.397  |
|                                                                                                                                   | 7.371  | 7.362  | 58-H   | 7.4068 | 7.371  |
|                                                                                                                                   | 7.370  | 7.196  | 36-H   | 7.3401 | 7.370  |
|                                                                                                                                   | 7.219  | 7.141  | 55-H   | 7.1576 | 7.219  |
|                                                                                                                                   | 7.146  | 7.054  | 51-H   | 7.1313 | 7.146  |
|                                                                                                                                   | 7.085  | 6.992  | 59-H   | 7.1261 | 7.085  |
|                                                                                                                                   | 6.466  | 6.857  | 48-H   | 6.8491 | 6.466  |
|                                                                                                                                   | 6.017  | 6.027  | 30-H   | 6.7202 | 6.018  |
| 5.630                                                                                                                             | 5.652  | 52-H   | 6.3319 | 5.631  |        |
| 4.341                                                                                                                             | 4.457  | 43-H   | 4.7508 | 4.341  |        |
| 3.489                                                                                                                             | 4.081  | 25-H   | 4.1707 | 3.489  |        |
| 3.441                                                                                                                             | 3.210  | 41-H   | 3.1371 | 3.441  |        |
| 2.983                                                                                                                             | 3.072  | 42-H   | 3.0032 | 2.983  |        |
| 2.754                                                                                                                             | 2.943  | 26-H   | 2.9756 | 2.754  |        |
| 2.655                                                                                                                             | 2.844  | 24-H   | 2.7179 | 2.655  |        |
|  <p style="text-align: center;"><b>4a</b></p> |        |        |        |        |        |



**Table 8.** Comparison of two computational methods for calculating the  $^1\text{H}$  NMR chemical shift of **4e** and **4E**

Red = B3LYP-D3/6-311++g(d,p)

Blue = B3LYP/6-311++g(d,p)

|                                                                                                                                 |        |        |       |        |       |                                                                                                                                   |
|---------------------------------------------------------------------------------------------------------------------------------|--------|--------|-------|--------|-------|-----------------------------------------------------------------------------------------------------------------------------------|
| 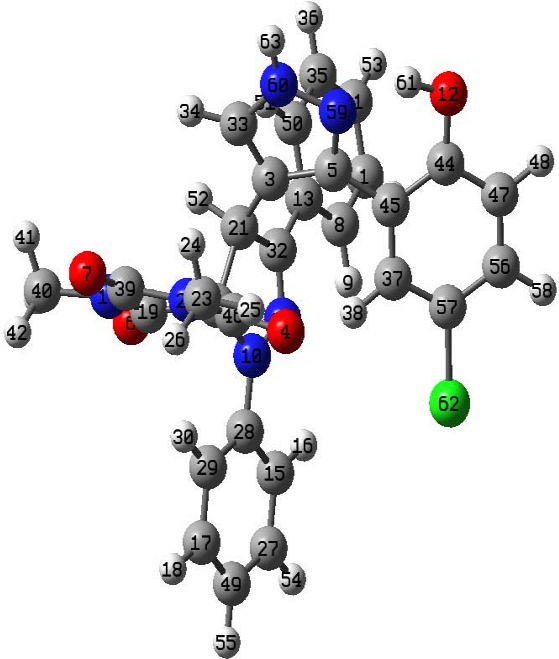 <p style="text-align: center;"><b>4E</b></p> | 10.25  | 15.172 | 61-H  | 13.519 | 9.856 |  <p style="text-align: center;"><b>4e</b></p> |
|                                                                                                                                 | 9.603  | 29.839 | 63-H  | 10.200 | 8.701 |                                                                                                                                   |
|                                                                                                                                 | 8.648  | 7.8098 | 38-H  | 8.857  | 8.214 |                                                                                                                                   |
|                                                                                                                                 | 8.065  | 7.0001 | 9-H   | 8.490  | 8.342 |                                                                                                                                   |
|                                                                                                                                 | 7.838  | 8.0821 | 16-H  | 8.241  | 8.214 |                                                                                                                                   |
|                                                                                                                                 | 7.797  | 7.6075 | 34-H  | 7.993  | 7.699 |                                                                                                                                   |
|                                                                                                                                 | 7.636  | 7.7026 | 54-H  | 7.724  | 7.389 |                                                                                                                                   |
|                                                                                                                                 | 7.598  | 7.2810 | 2-H   | 7.509  | 7.341 |                                                                                                                                   |
|                                                                                                                                 | 7.482  | 7.5634 | 53-H  | 7.437  | 7.306 |                                                                                                                                   |
|                                                                                                                                 | 7.479  | 7.4037 | 18-H  | 7.382  | 7.237 |                                                                                                                                   |
|                                                                                                                                 | 7.426  | 7.7244 | 36-H  | 7.250  | 7.209 |                                                                                                                                   |
|                                                                                                                                 | 7.259  | 7.4403 | 58-H  | 7.183  | 7.146 |                                                                                                                                   |
|                                                                                                                                 | 7.236  | 7.1197 | 55-H  | 7.119  | 6.921 |                                                                                                                                   |
|                                                                                                                                 | 7.235  | 8.7709 | 51-H  | 6.995  | 6.647 |                                                                                                                                   |
|                                                                                                                                 | 7.024  | 7.2868 | 48-H  | 6.801  | 6.049 |                                                                                                                                   |
|                                                                                                                                 | 6.150  | 6.2516 | 30-H  | 6.001  | 5.456 |                                                                                                                                   |
|                                                                                                                                 | 5.722  | 6.5326 | 52-H  | 5.710  | 4.101 |                                                                                                                                   |
|                                                                                                                                 | 3.645  | 3.2480 | 43-H  | 4.442  | 3.368 |                                                                                                                                   |
|                                                                                                                                 | 3.227  | 2.5420 | 25-H  | 4.094  | 3.331 |                                                                                                                                   |
| 3.001                                                                                                                           | 3.7384 | 41-H   | 3.244 | 3.017  |       |                                                                                                                                   |
| 2.818                                                                                                                           | 4.4474 | 42-H   | 3.058 | 2.923  |       |                                                                                                                                   |
| 2.501                                                                                                                           | 2.8970 | 26-H   | 2.927 | 2.723  |       |                                                                                                                                   |
|                                                                                                                                 | 4.0745 | 24-H   | 2.794 |        |       |                                                                                                                                   |

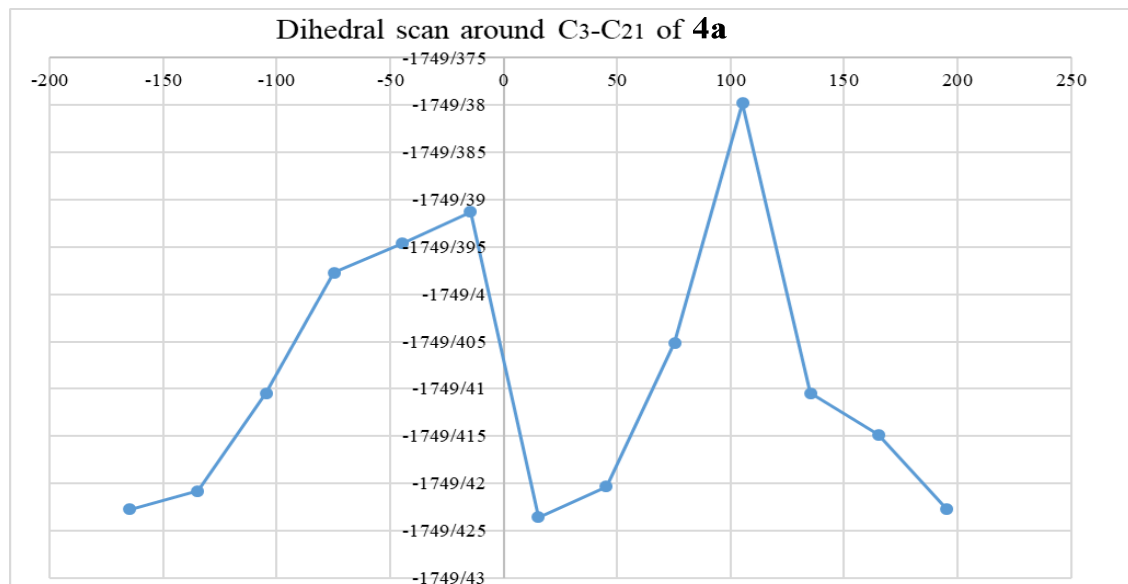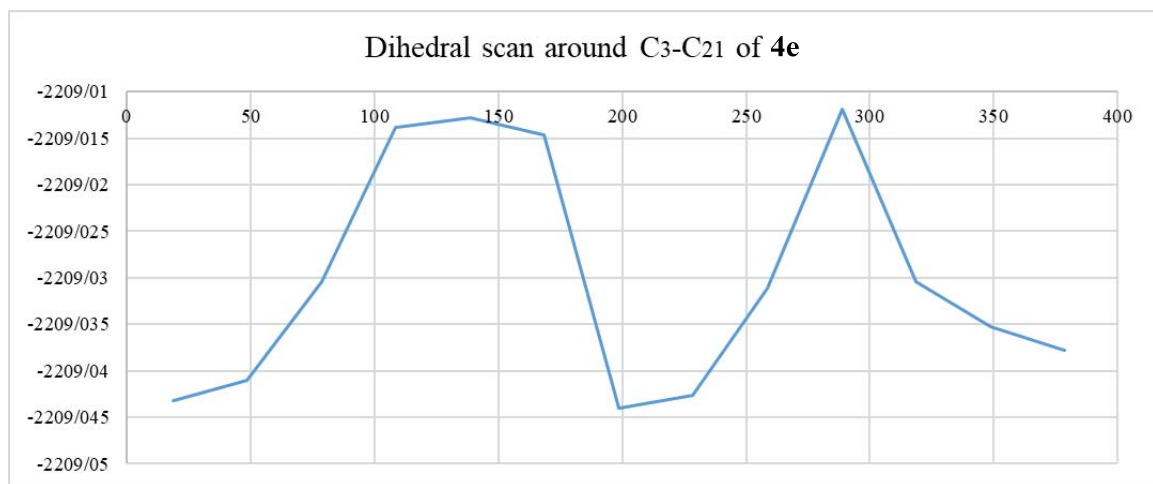

**Figure 2.** Dihedral Scan around the C<sub>3</sub>-C<sub>21</sub> bond in **4a** (top) and **4e** (bottom), B3LYP-D3/6-311++g(d,p)

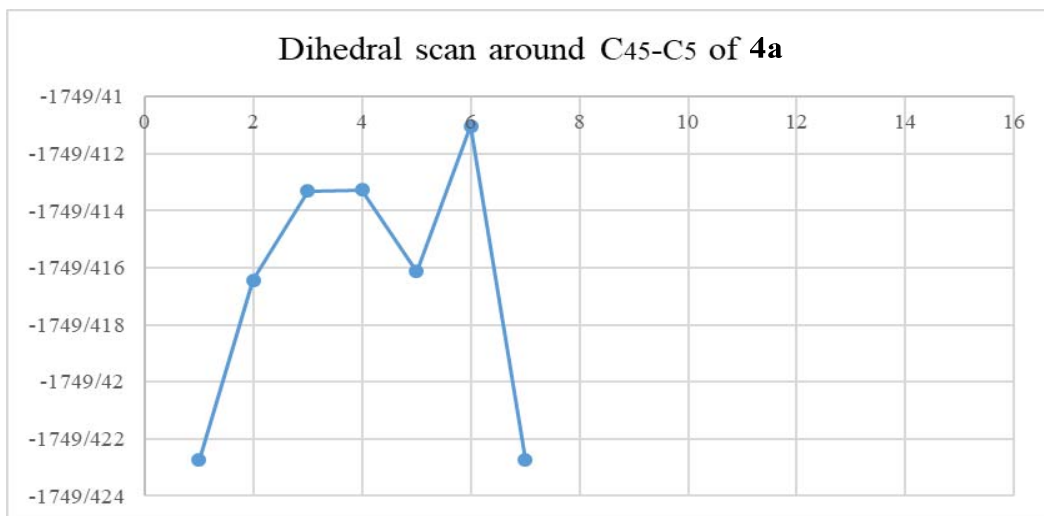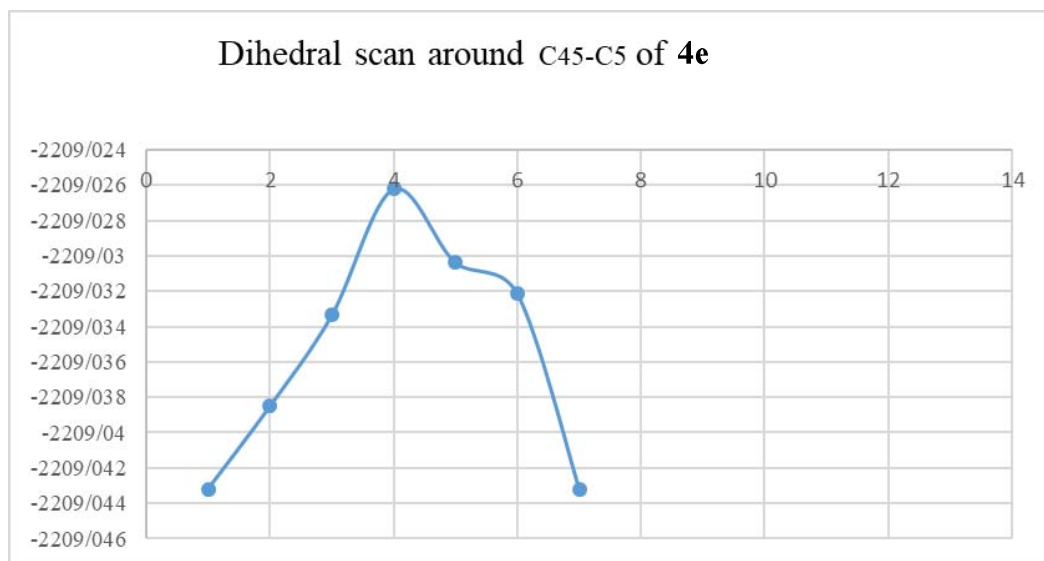

**Figure 3.** Dihedral Scan around the C45-C5 bond in **4a** (top) and **4e** (bottom), B3LYP-D3/6-311++g(d,p)

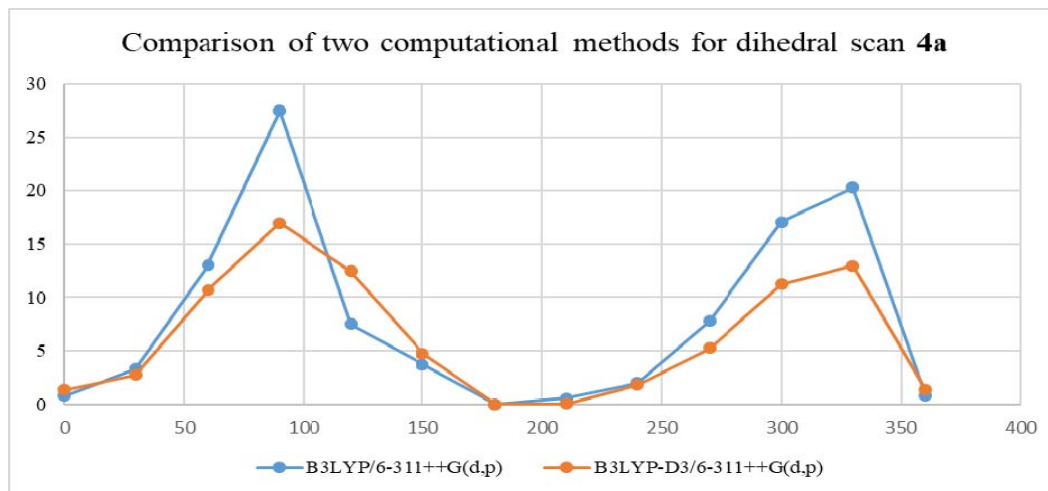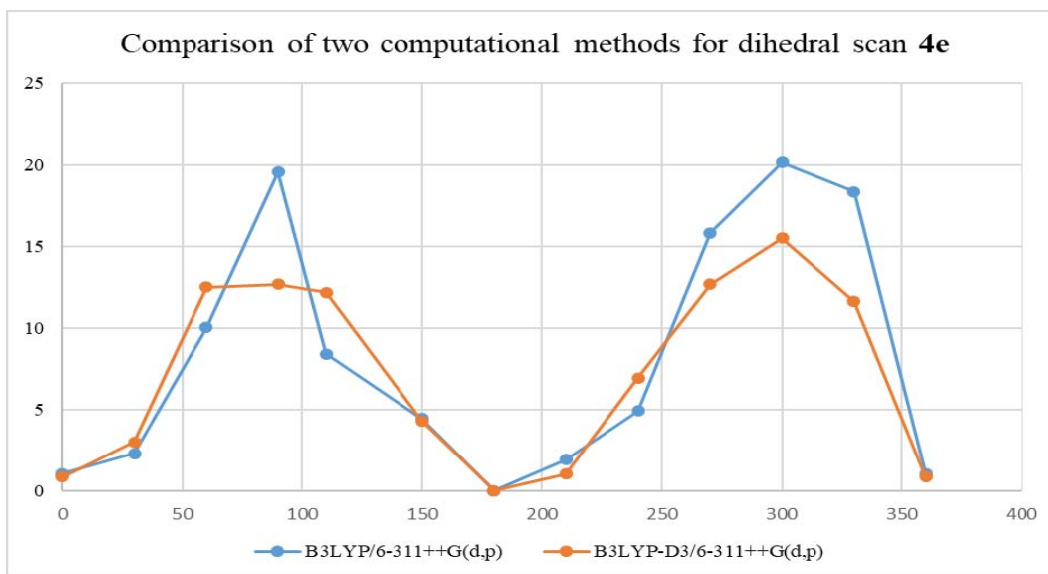

**Figure 4.** Comparison of two computational methods for dihedral scan **4a** and **4e**

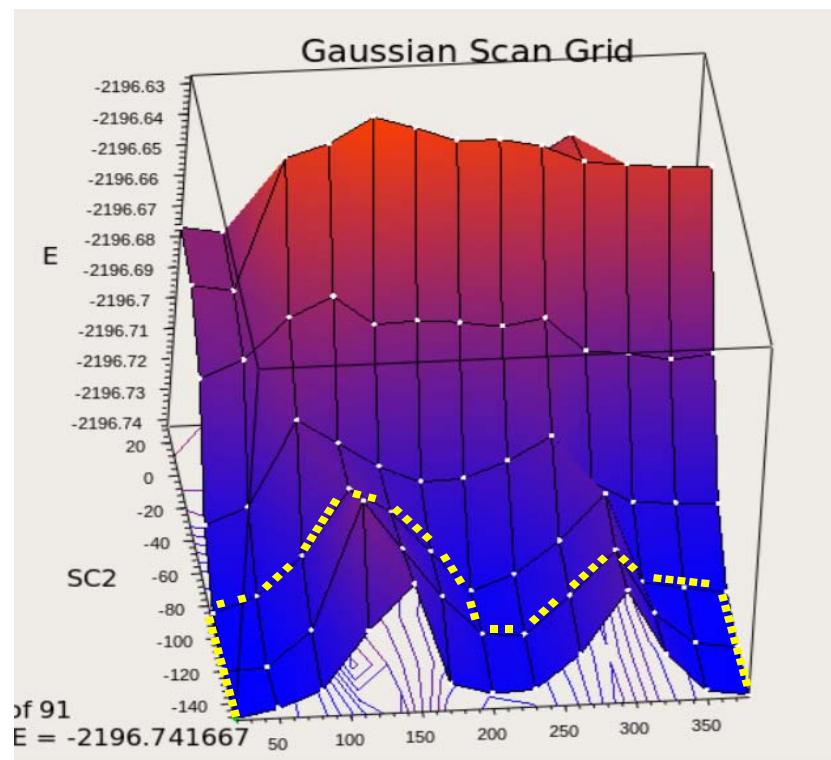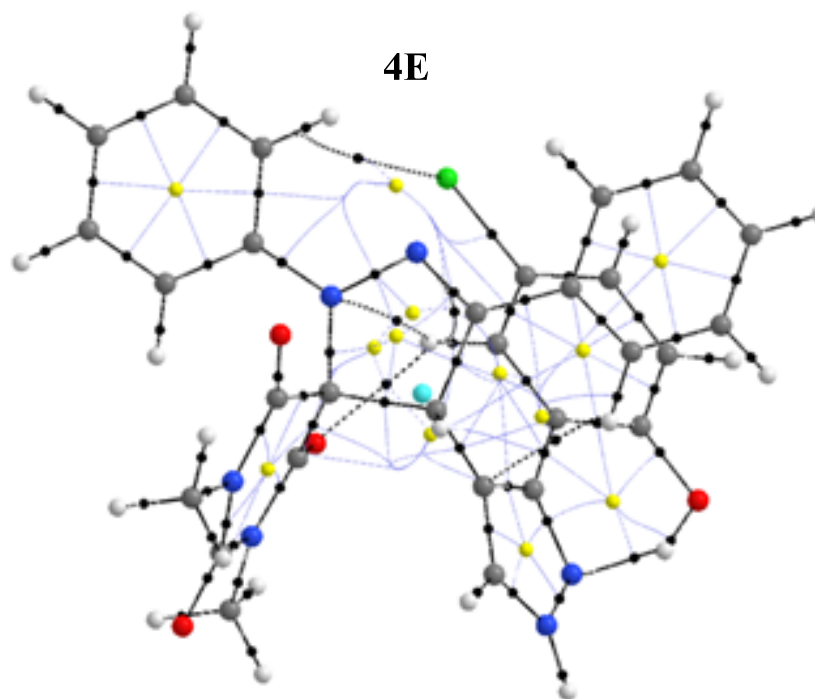

Figure 5. Two-plot Scan Energy for 4E

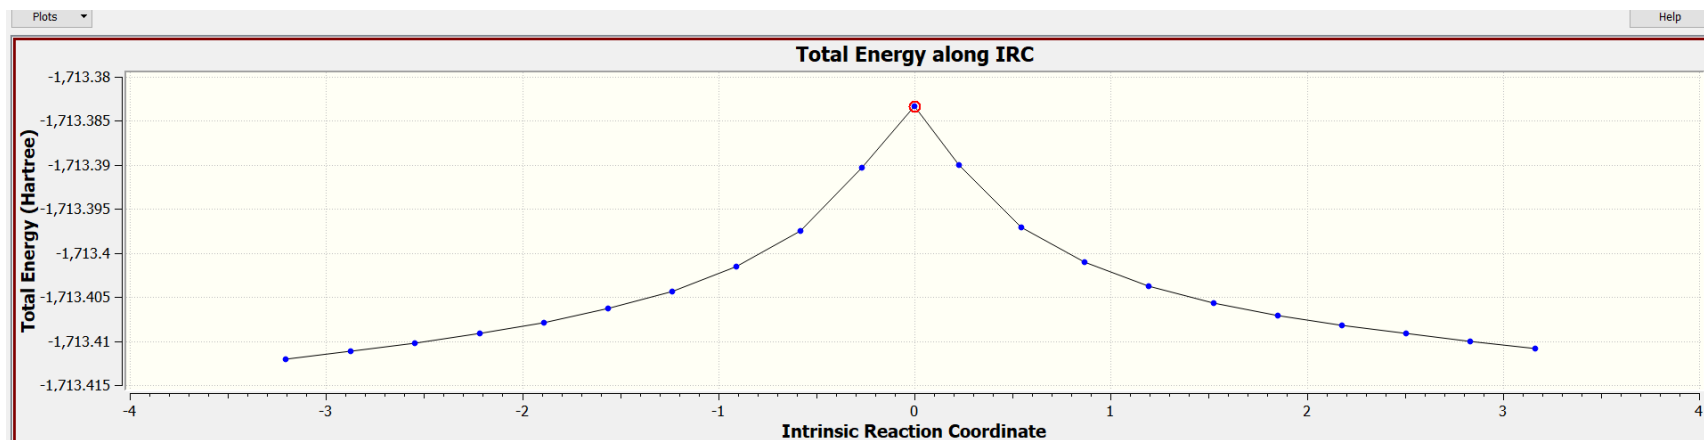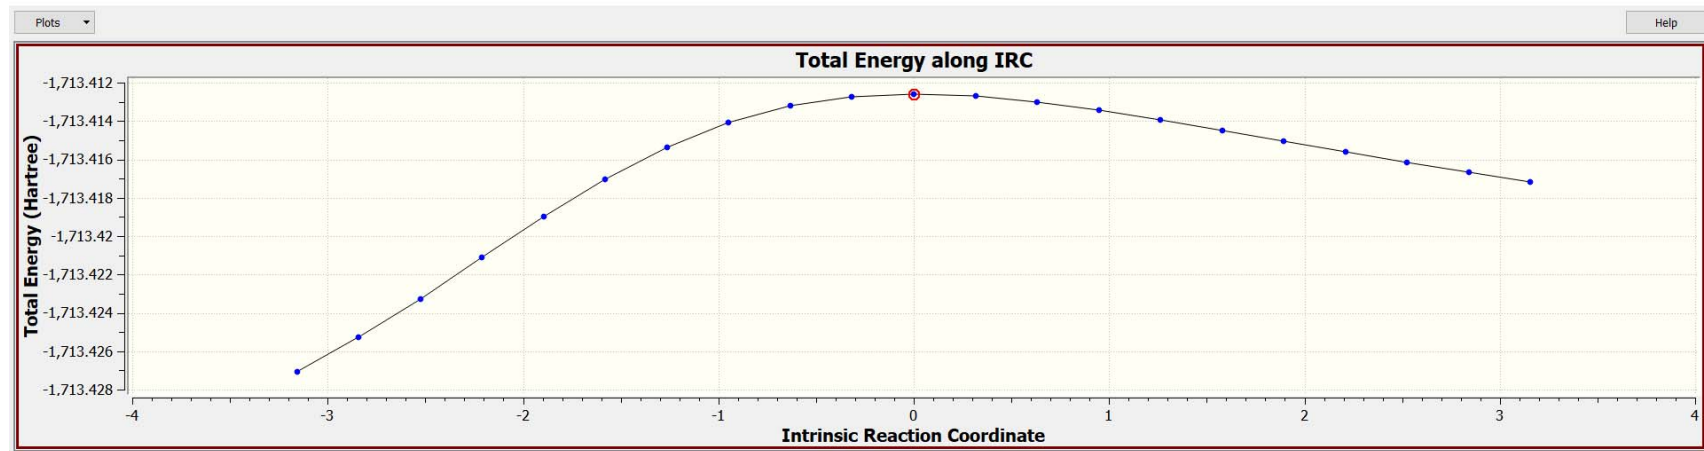

**Figure 6.** Total Energy along IRC for both reactions, propargylic path (top) and carbenoid path (bottom)

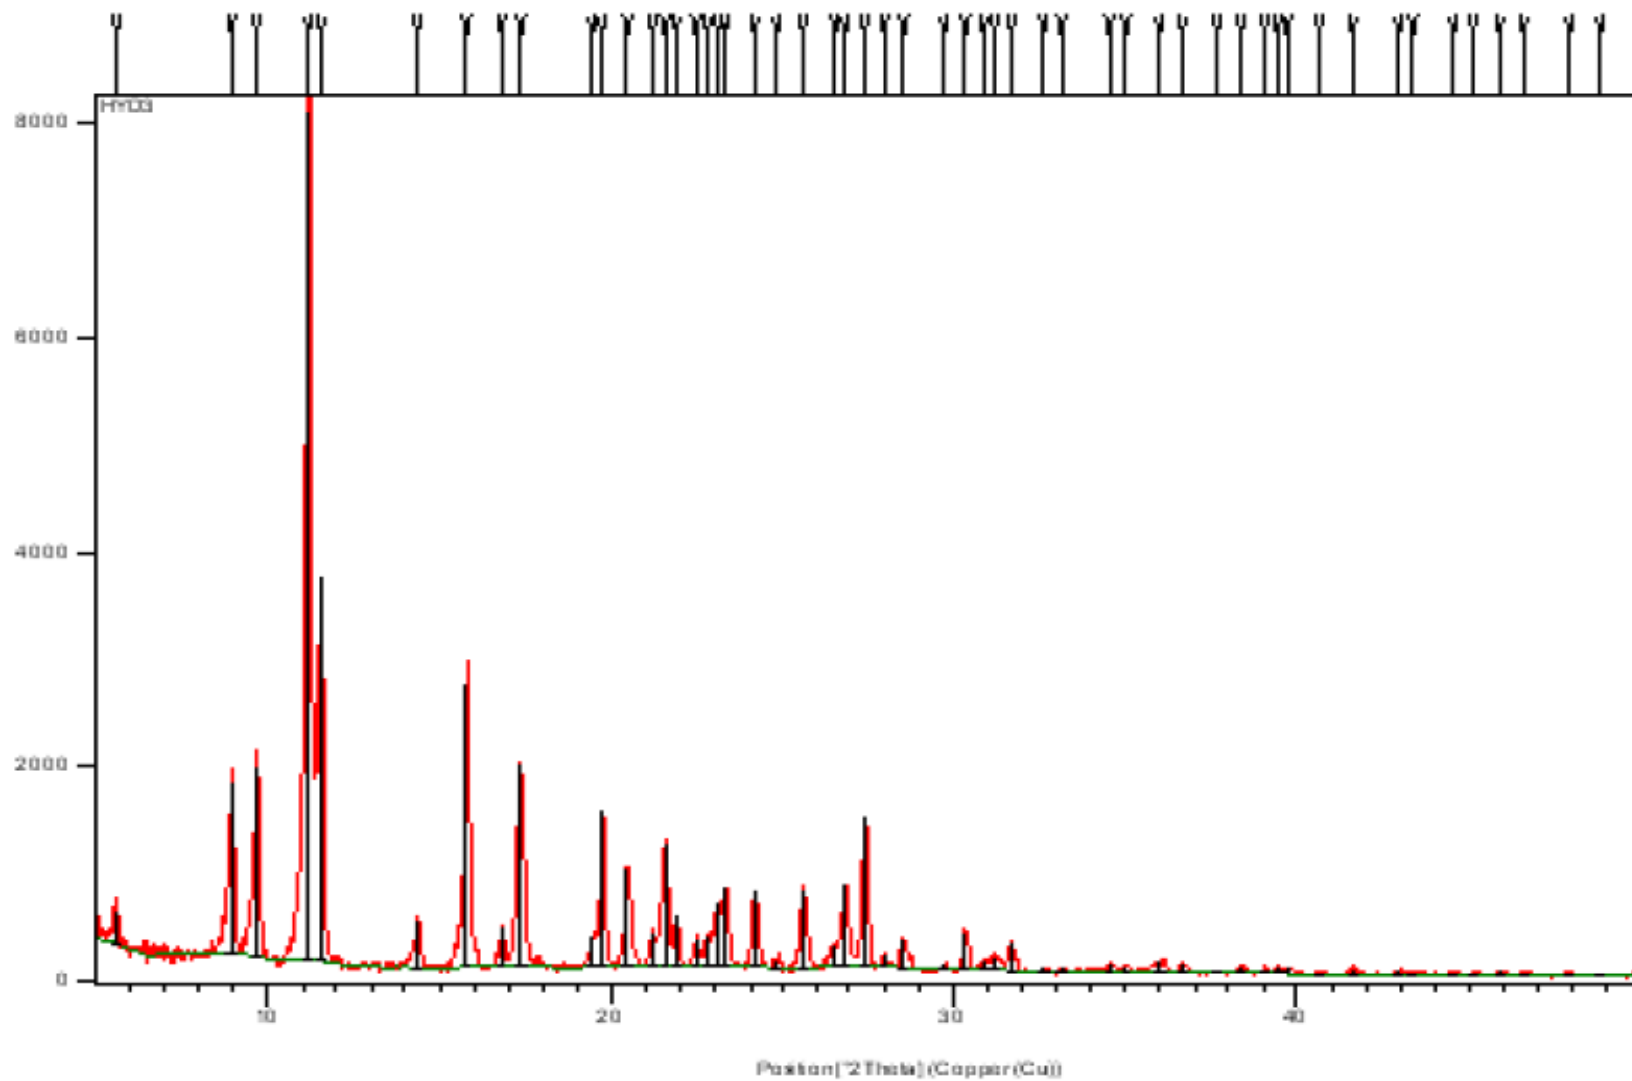

Figure 7. Experimental XRD patterns for 4d

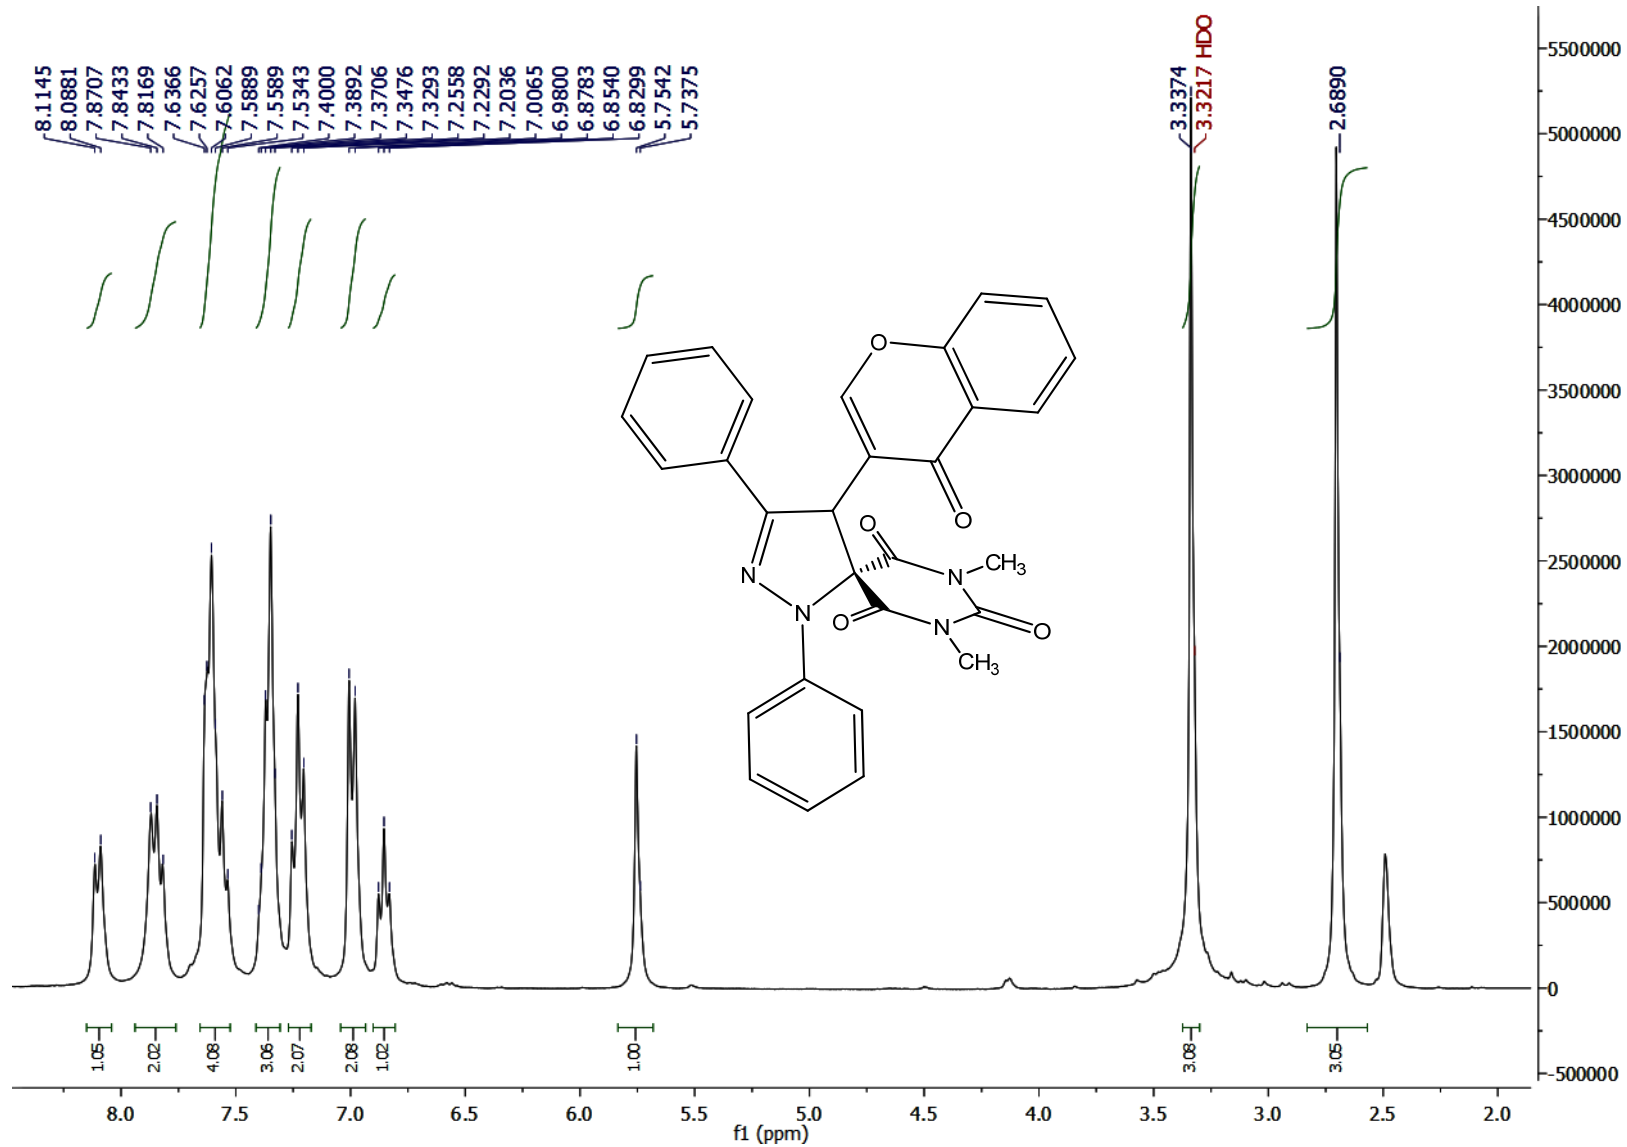

<sup>1</sup>H NMR (DMSO, 300 MHz) spectrum of **3a**



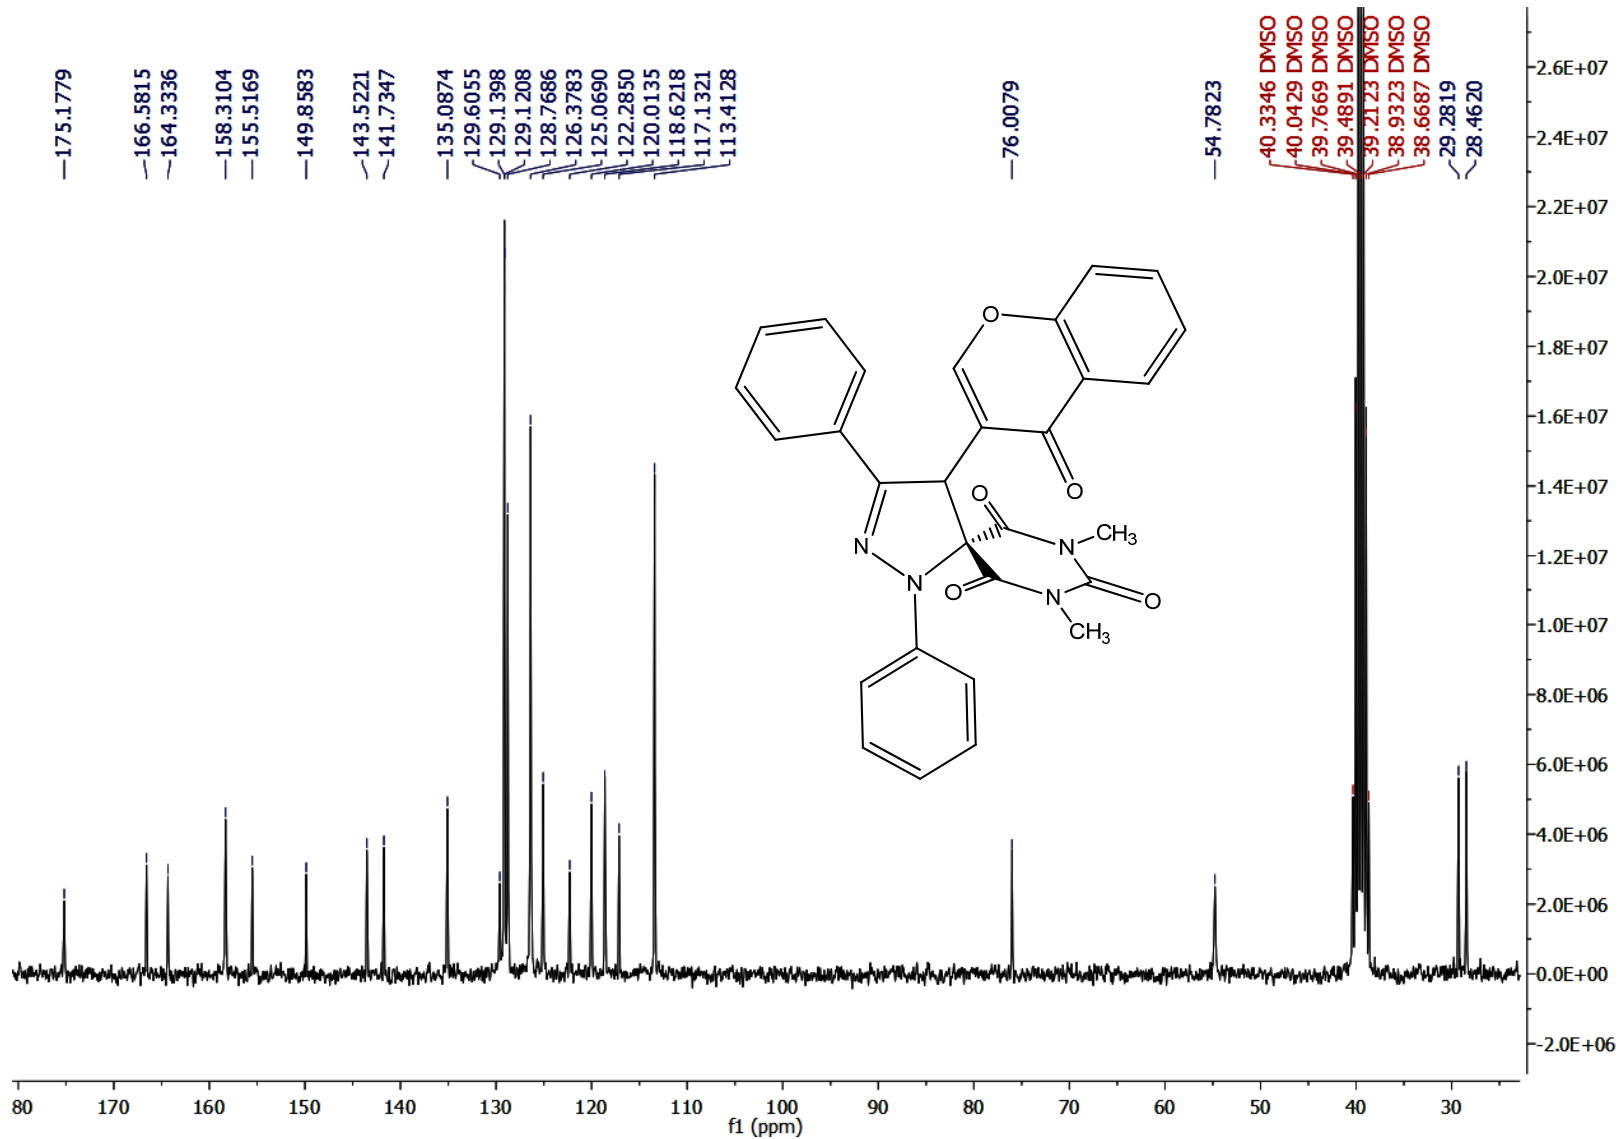

$^{13}\text{C}\{^1\text{H}\}$  NMR (DMSO, 75 MHz) spectrum of **3a**

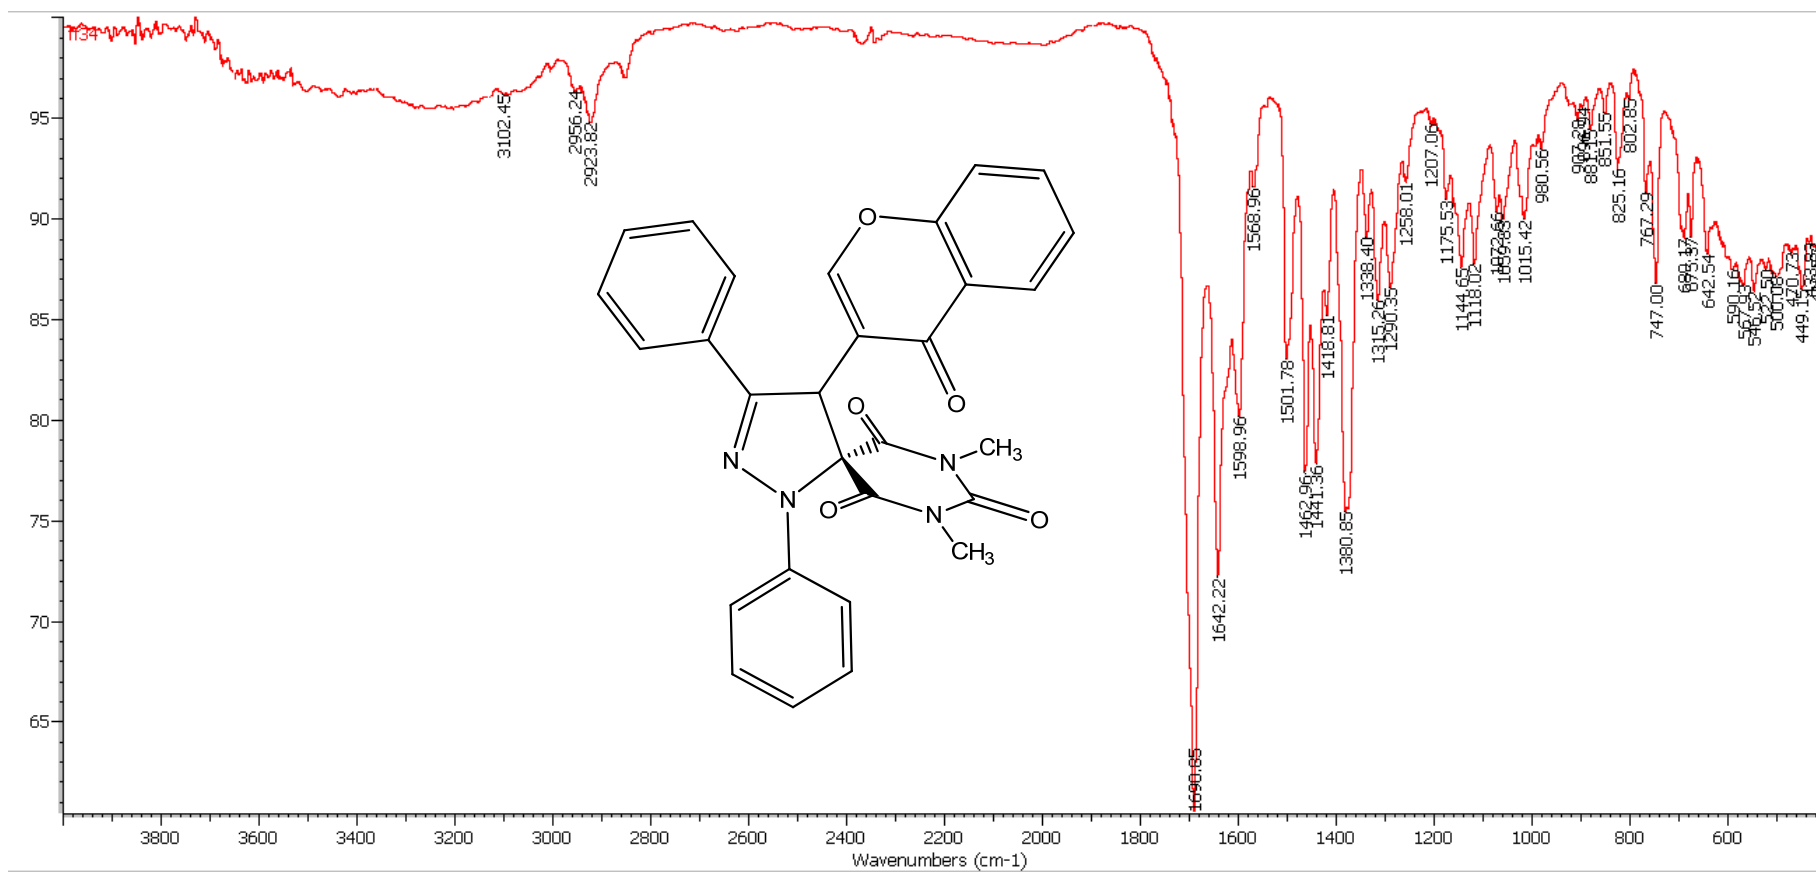

IR of 3a

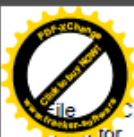

File : C:\MSDCHEM\3\DATA\Snapshot\FF34.d

Operator :

Acquired : 12 Feb 2020 10:20 using AcqMethod default.597x.m

Instrument : Direct Probe

Sample Name:

Misc Info :

Vial Number: 1

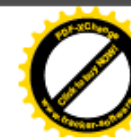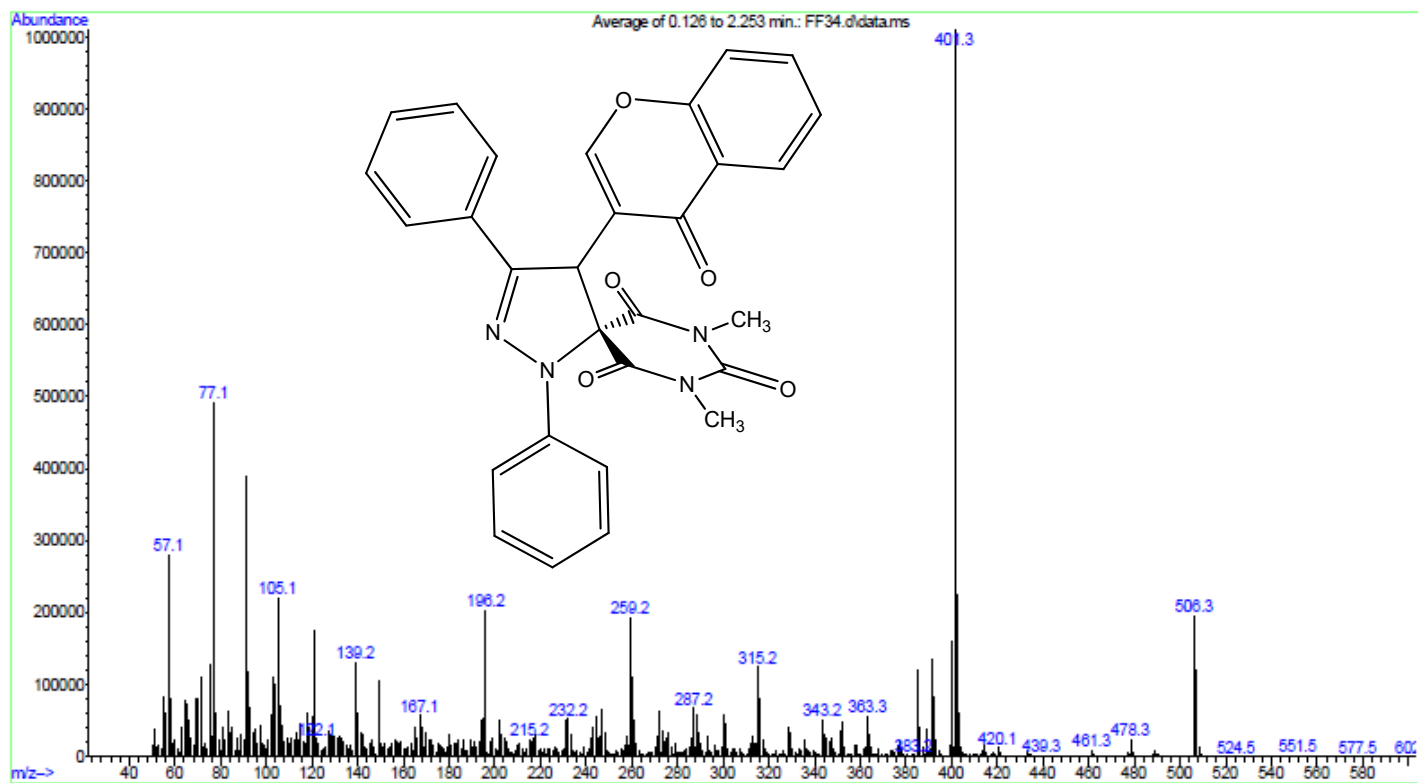

Mass of compound 3a

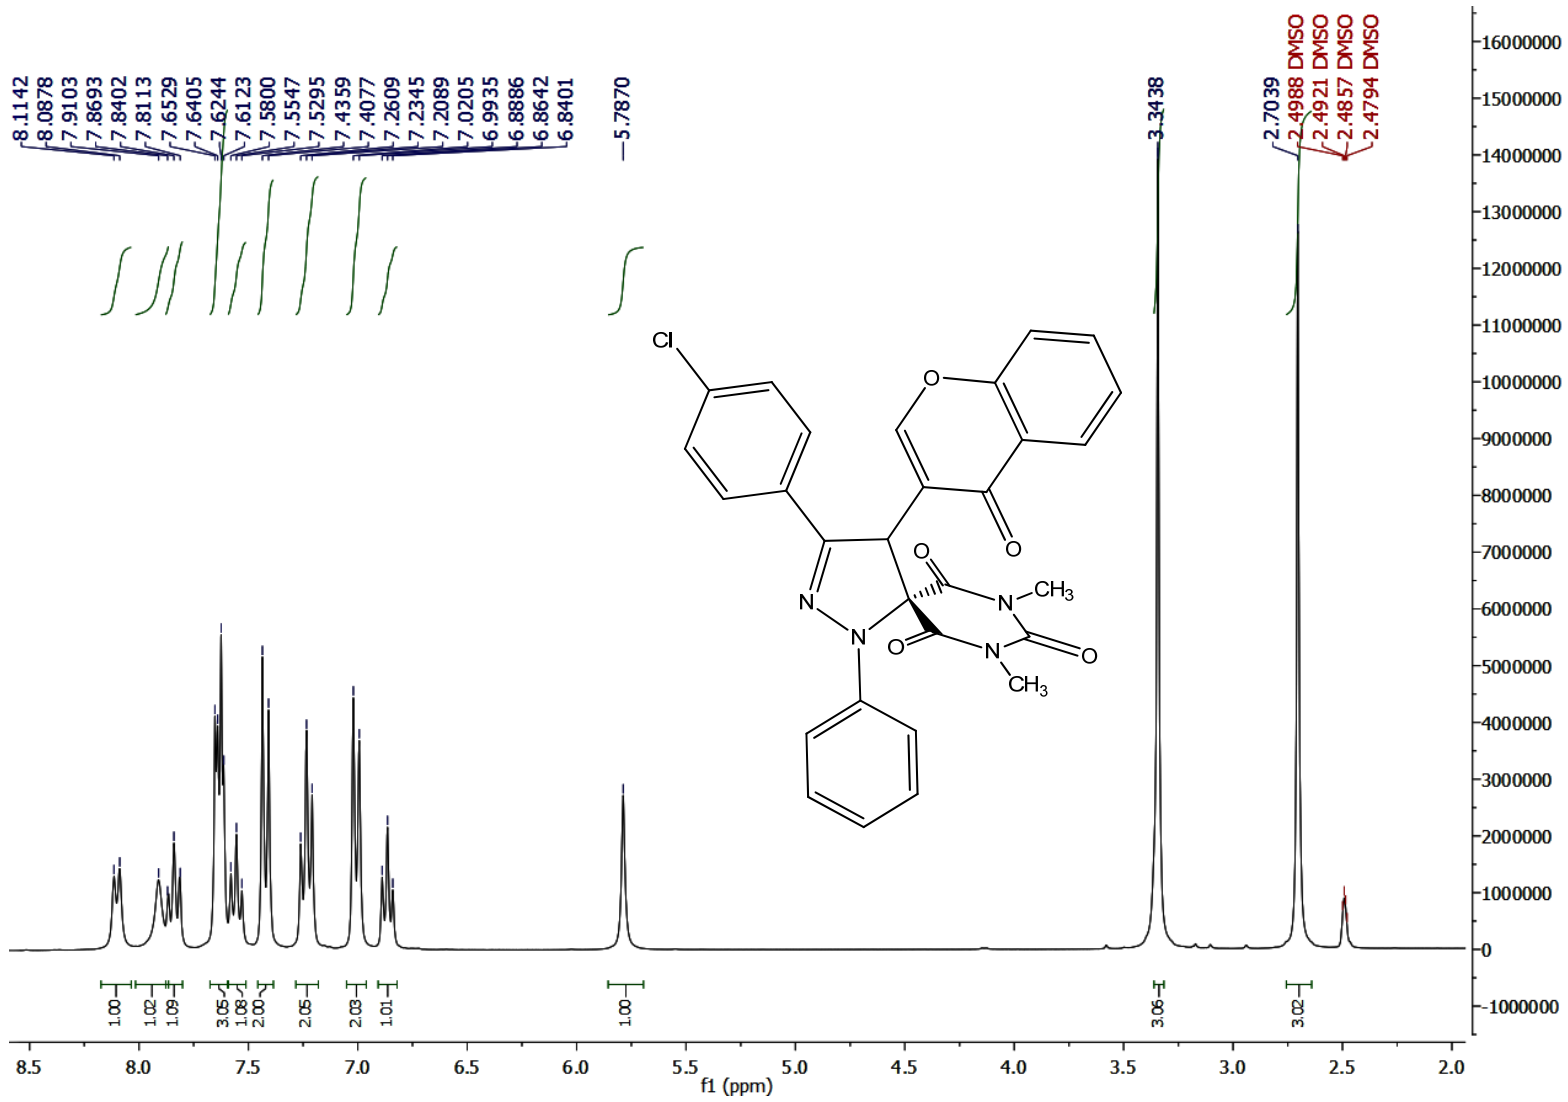

<sup>1</sup>H NMR (DMSO, 300 MHz) spectrum of **3b**

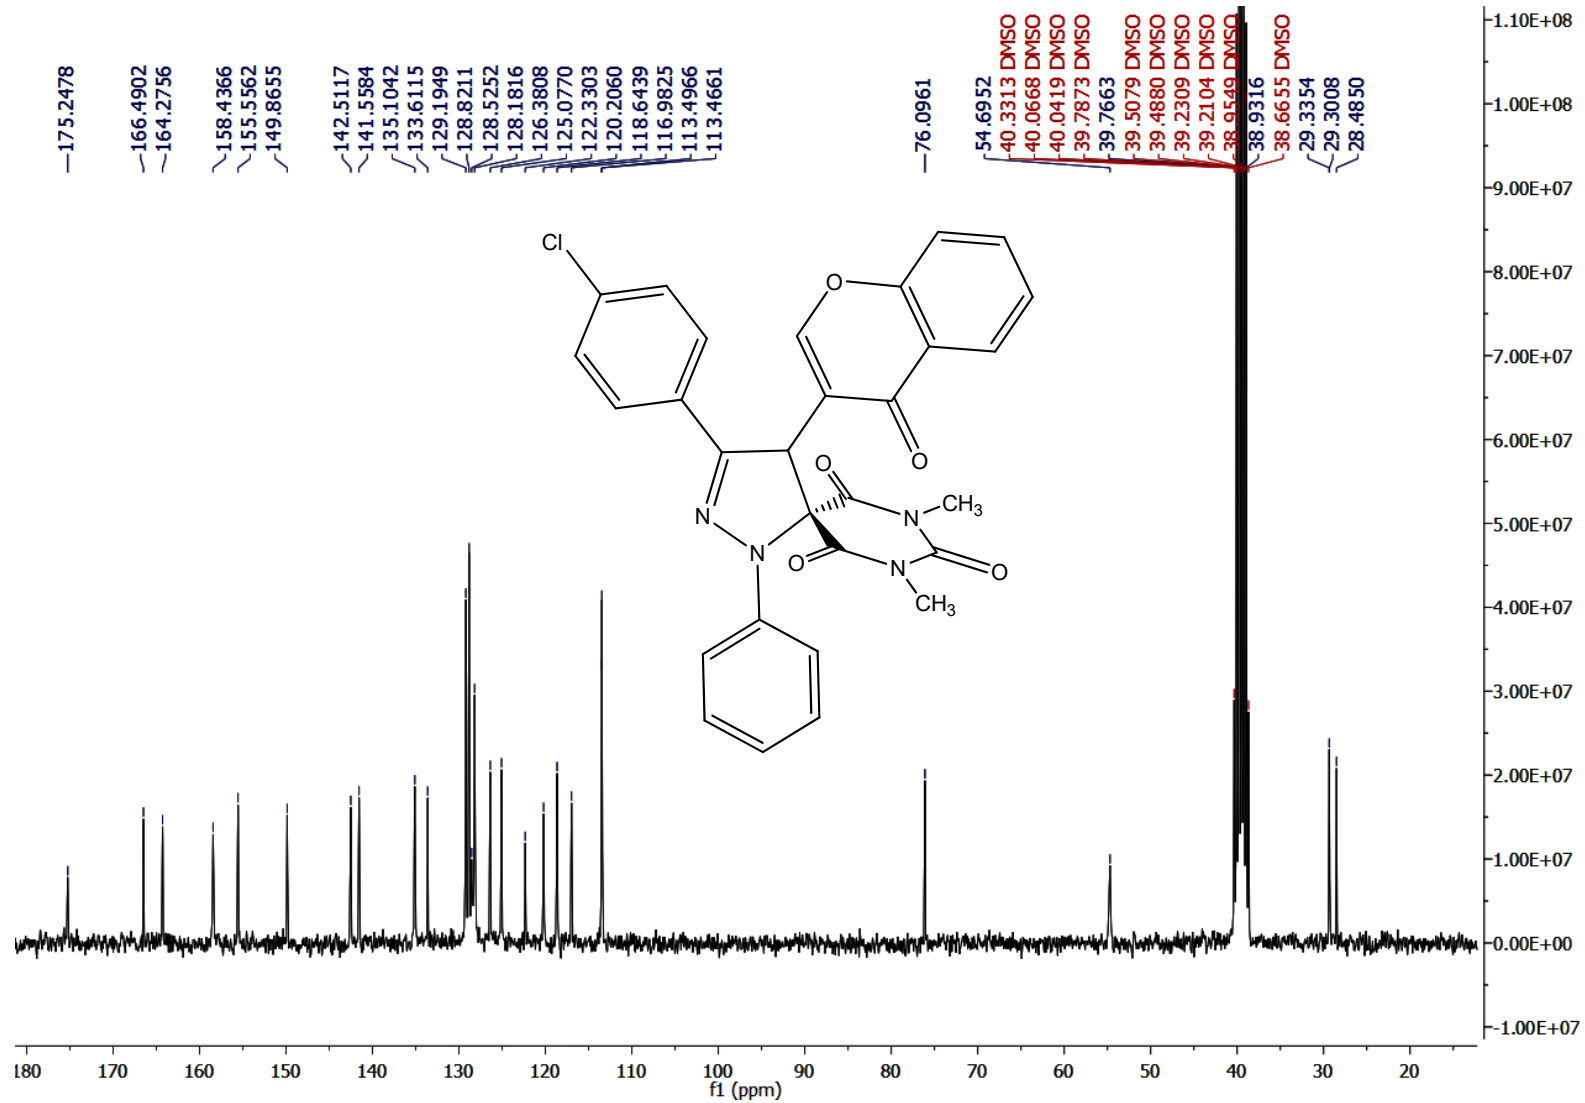

$^{13}\text{C}\{^1\text{H}\}$  NMR (DMSO, 75 MHz) spectrum of **3b**

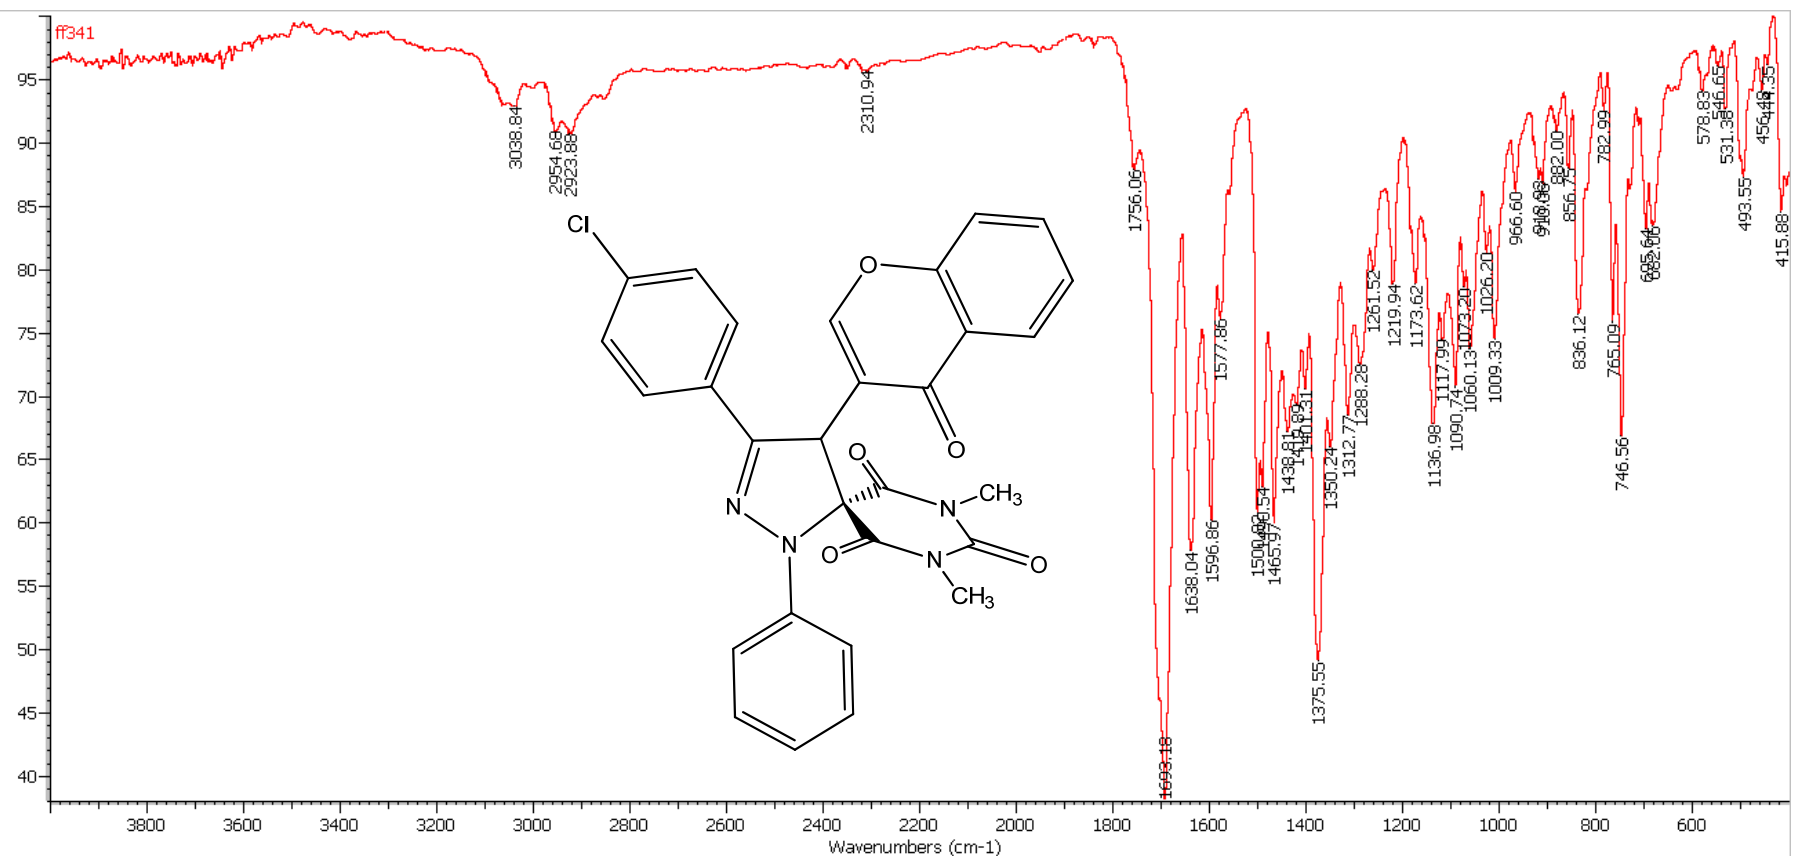

IR of 3b

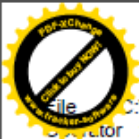

File : C:\MSDCHEM\3\DATA\Snapshot\FF341.d  
Operator :  
Acquired : 6 Oct 2020 16:47 using AcqMethod default.597x.m  
Instrument : Direct Probe  
Sample Name:  
Misc Info :  
Vial Number: 1

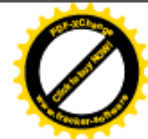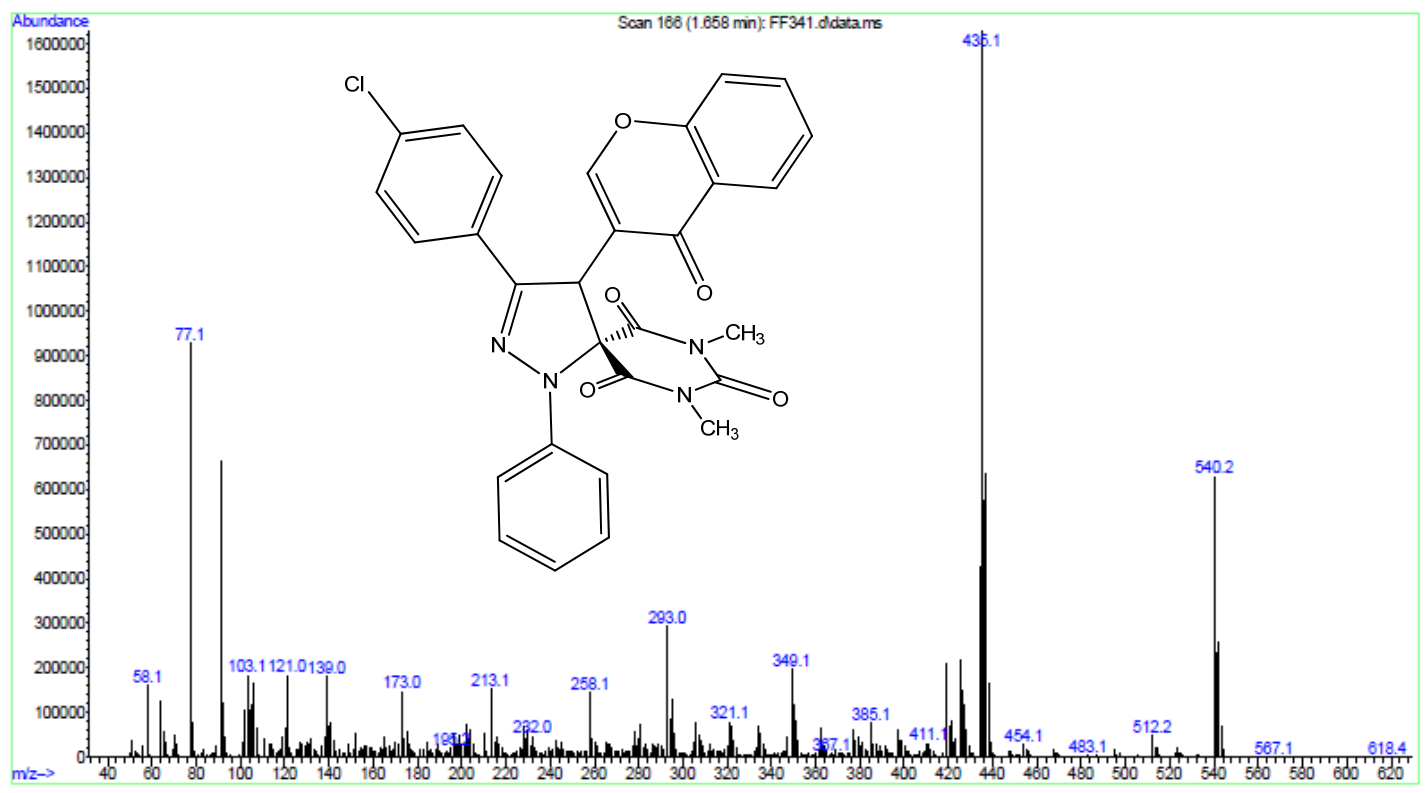

Mass of compound 3b

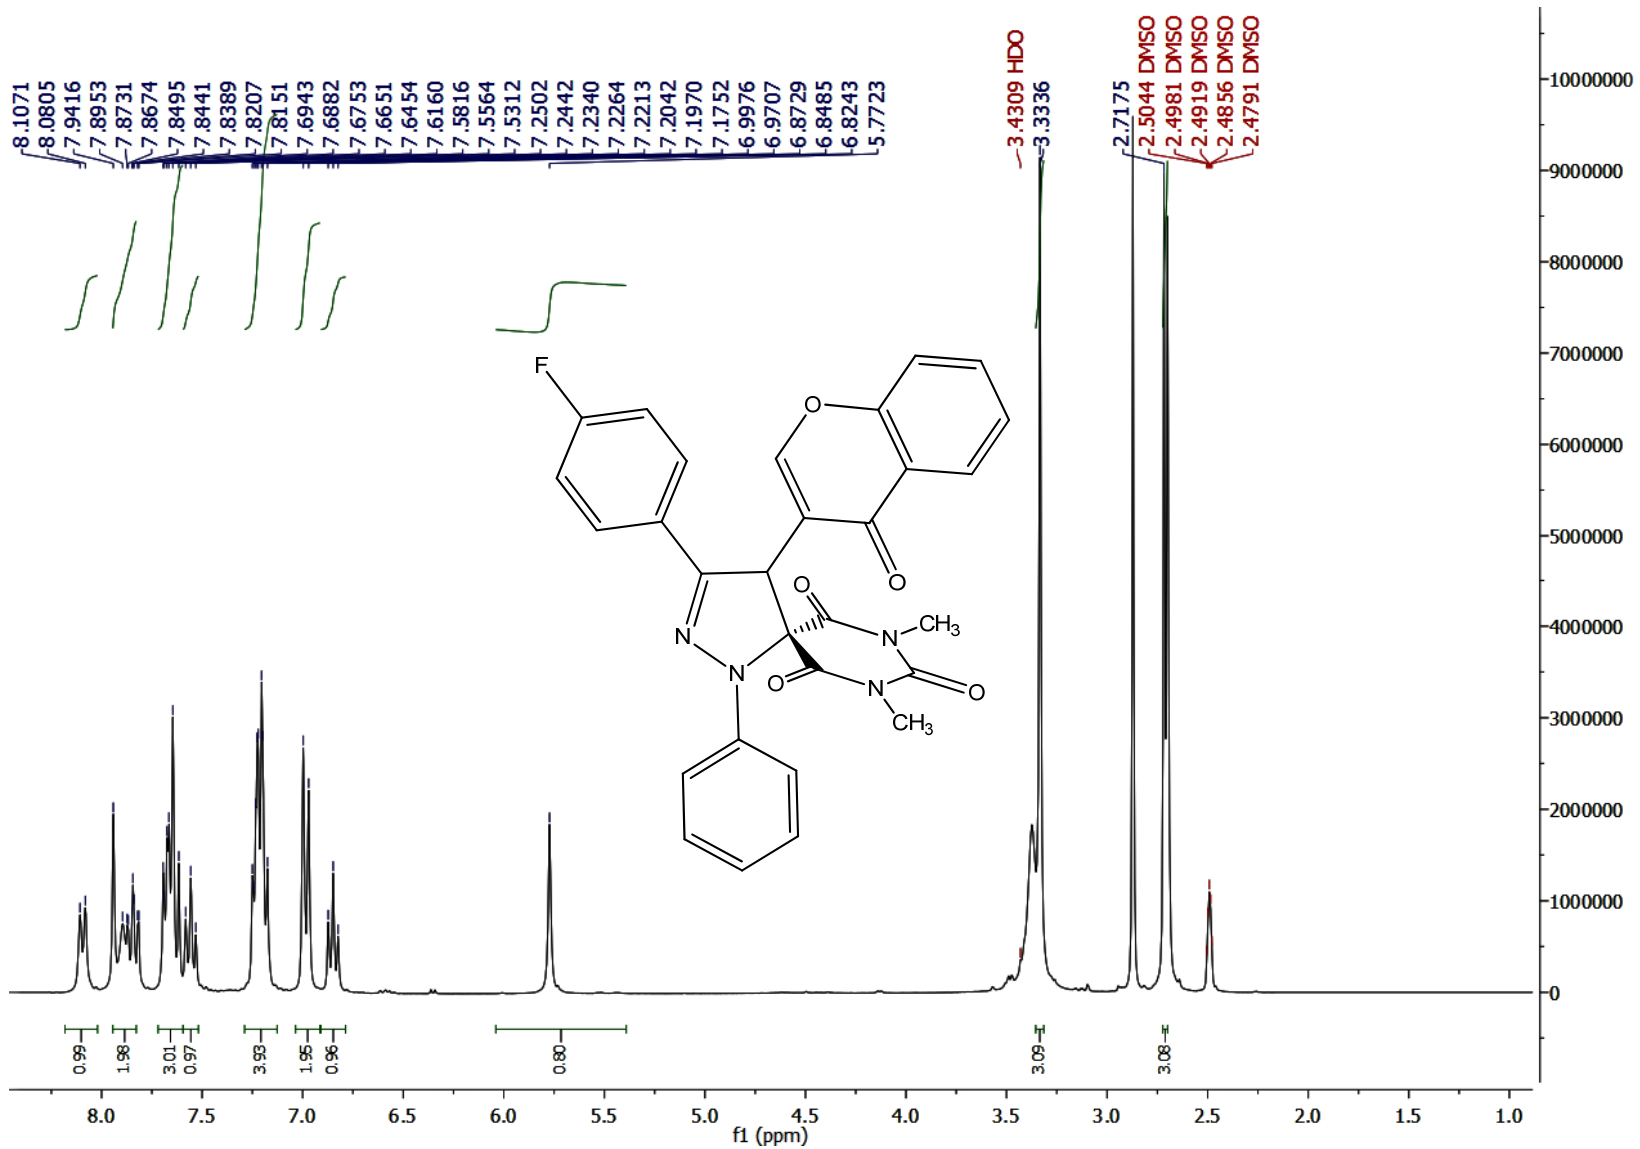

<sup>1</sup>H NMR (DMSO, 300 MHz) spectrum of **3c**



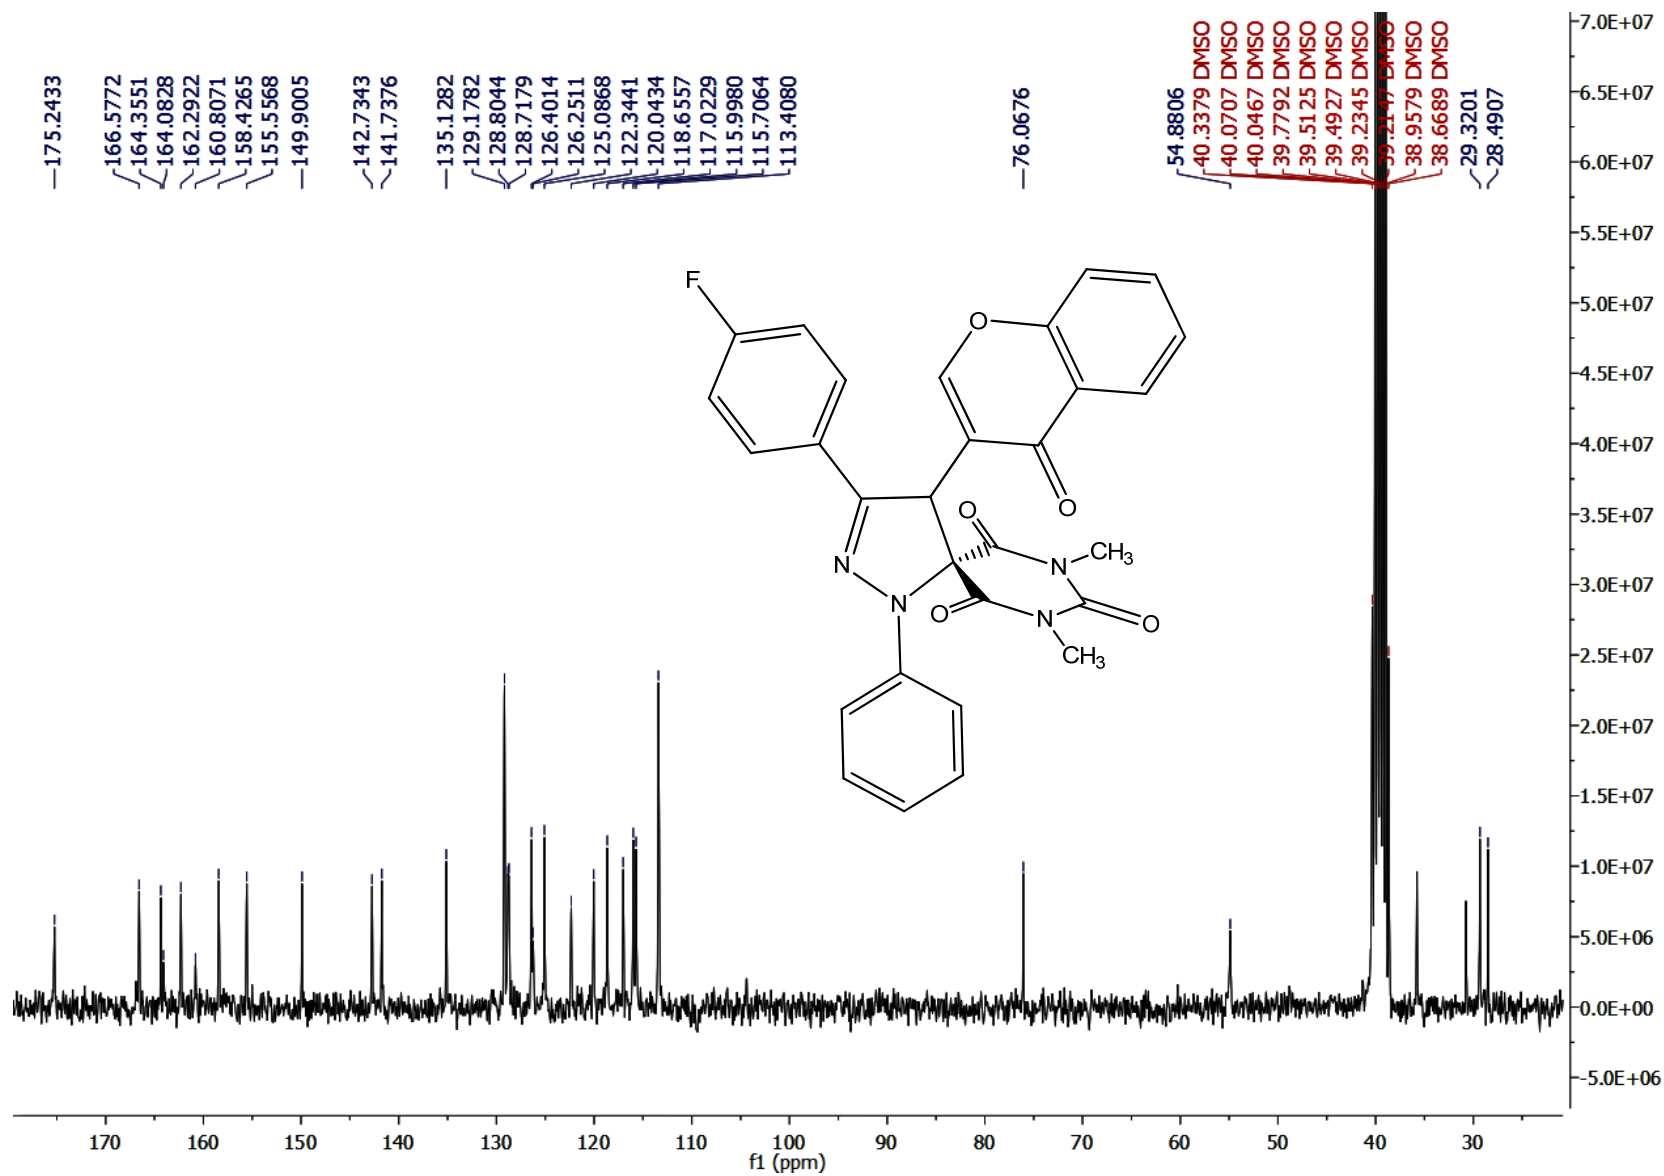

$^{13}\text{C}\{^1\text{H}\}$  NMR (DMSO, 75 MHz) spectrum of **3c**

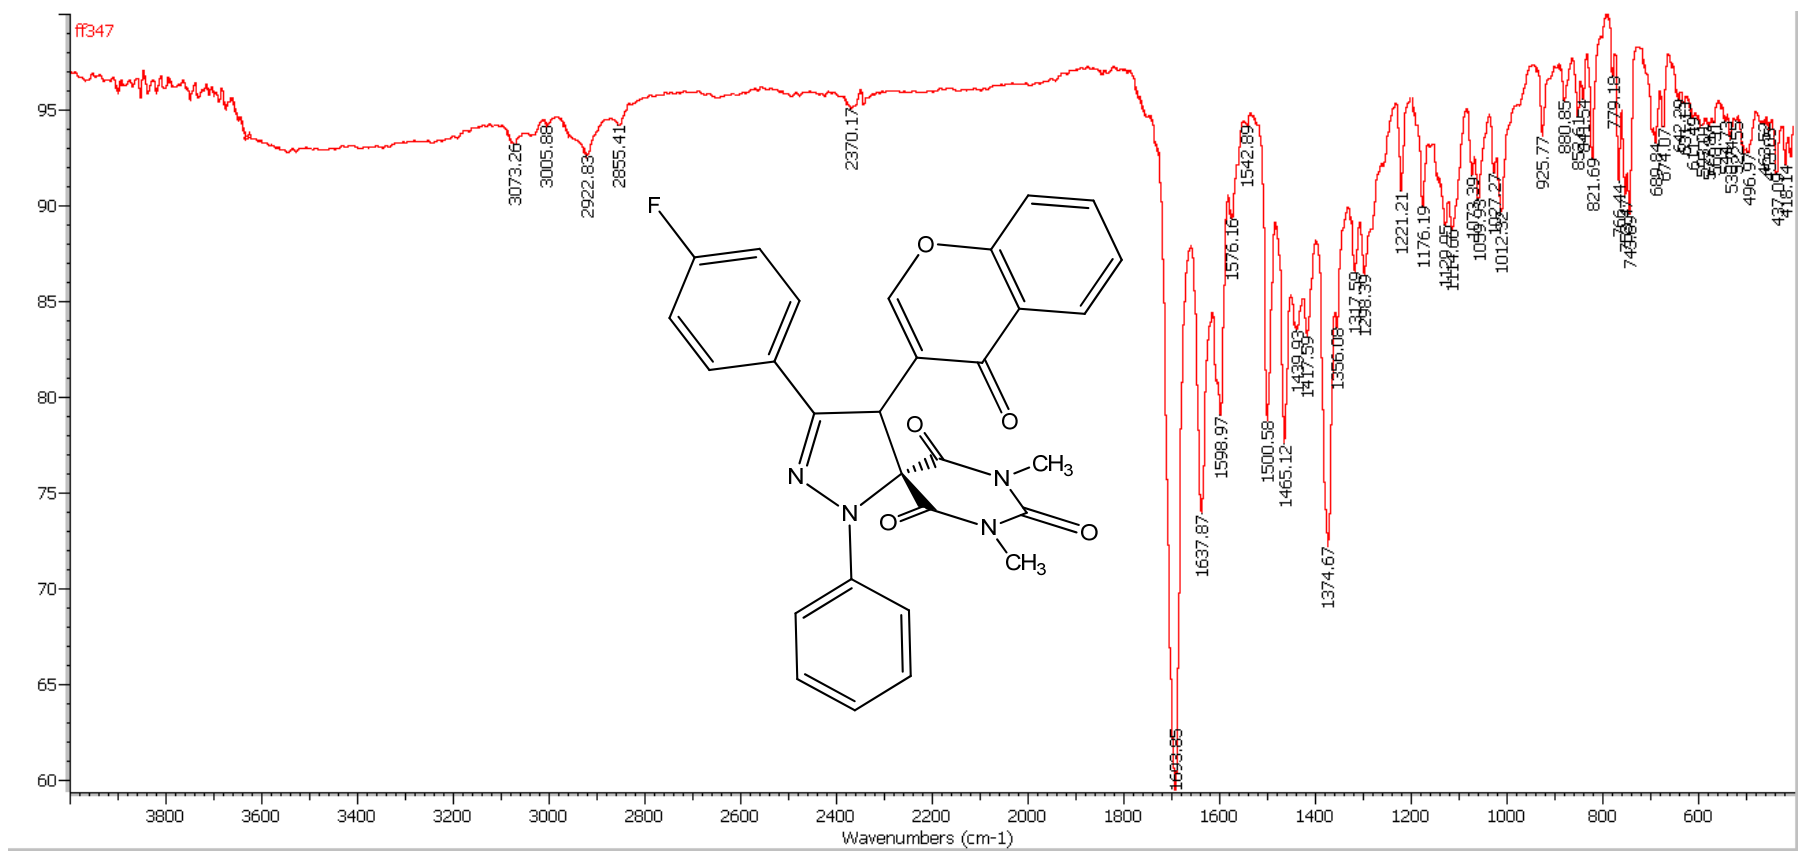

IR of 3c

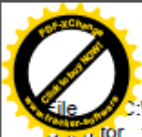

File : C:\MSDCHEM\3\DATA\Snapshot\FF347.d

Operator :

Acquired : 6 Oct 2020 16:55 using AcqMethod default.597x.m

Instrument : Direct Probe

Sample Name:

Misc Info :

Vial Number: 1

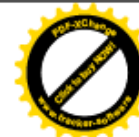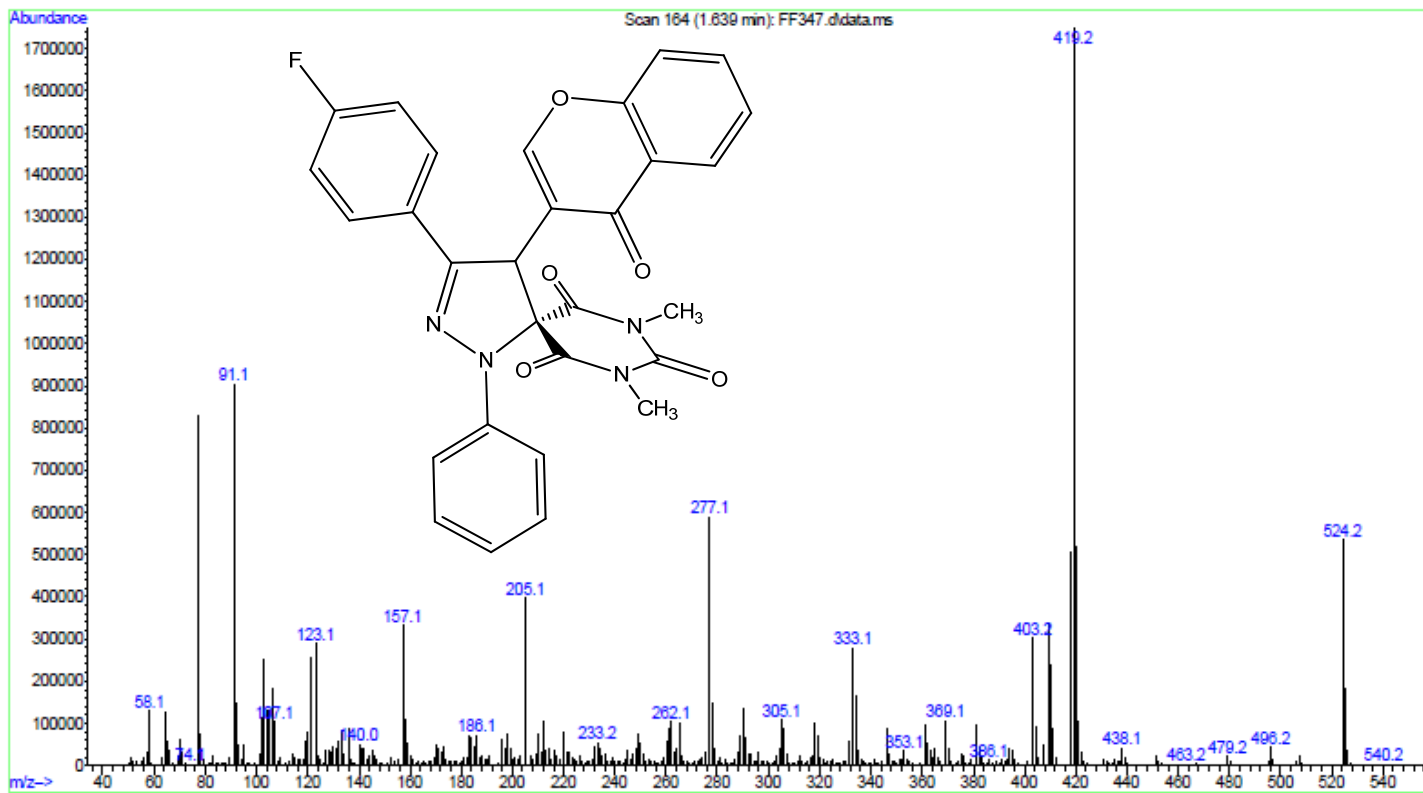

Mass of 3c

S27

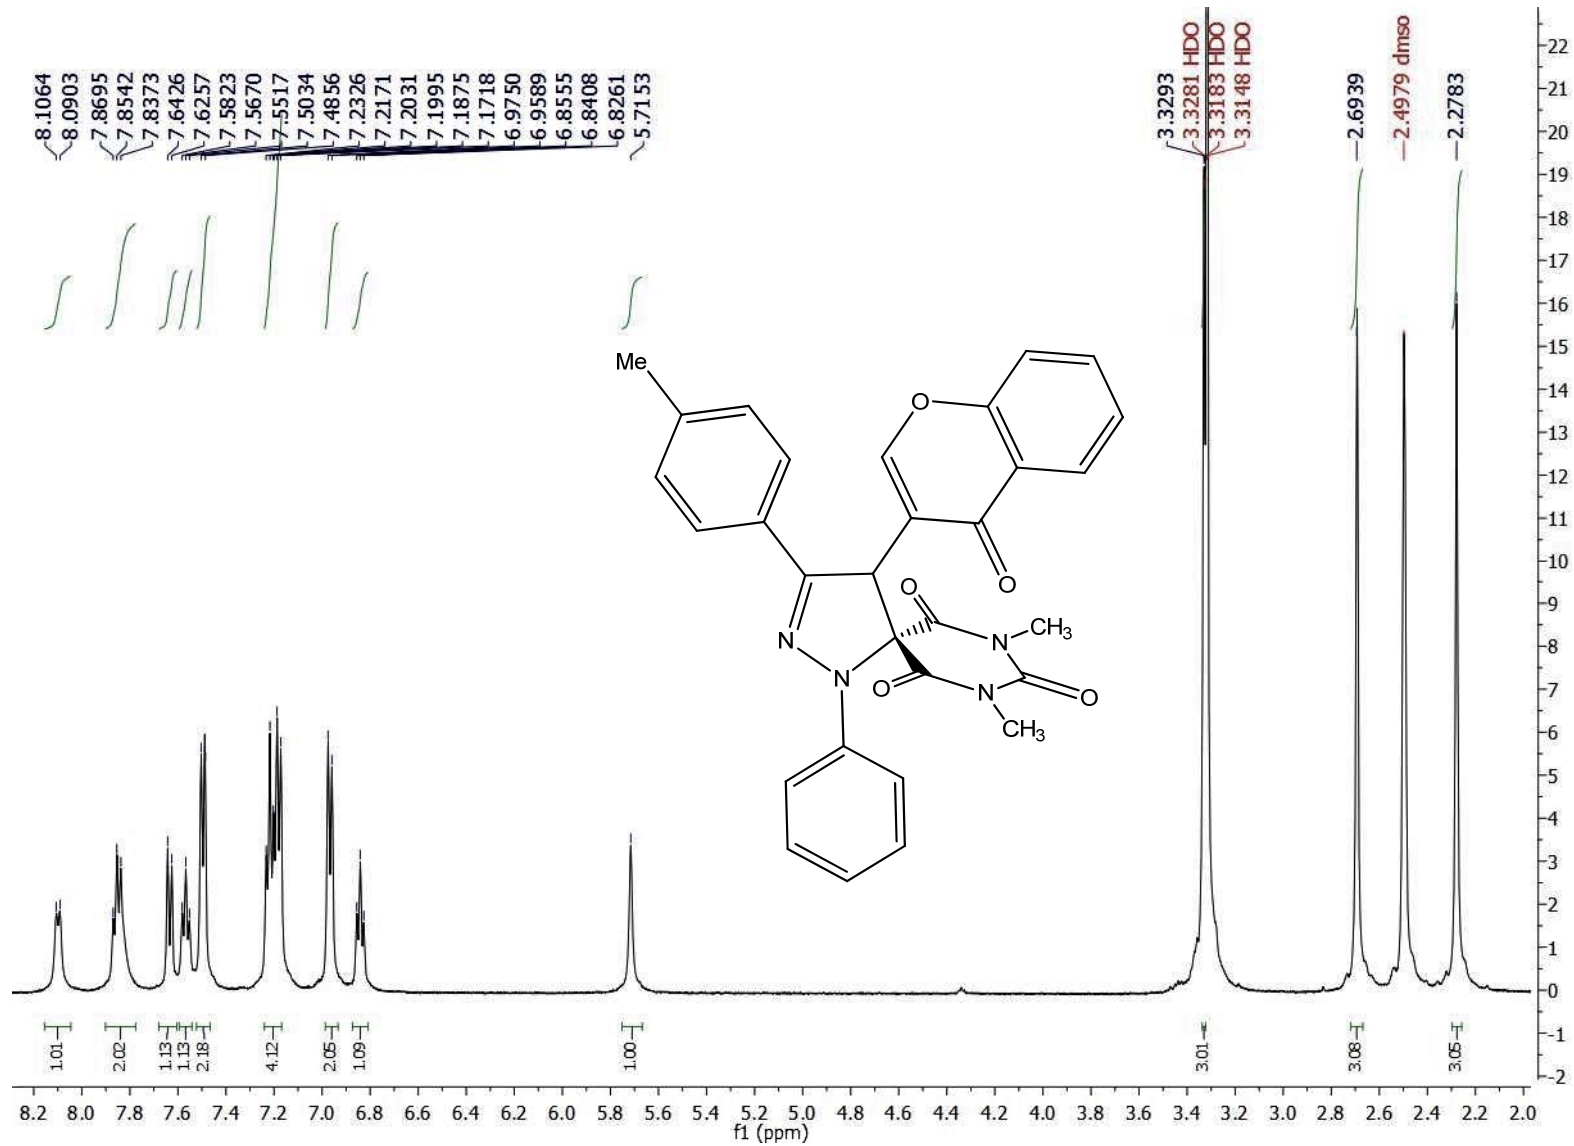

<sup>1</sup>H NMR (DMSO, 300 MHz) spectrum of **3d**

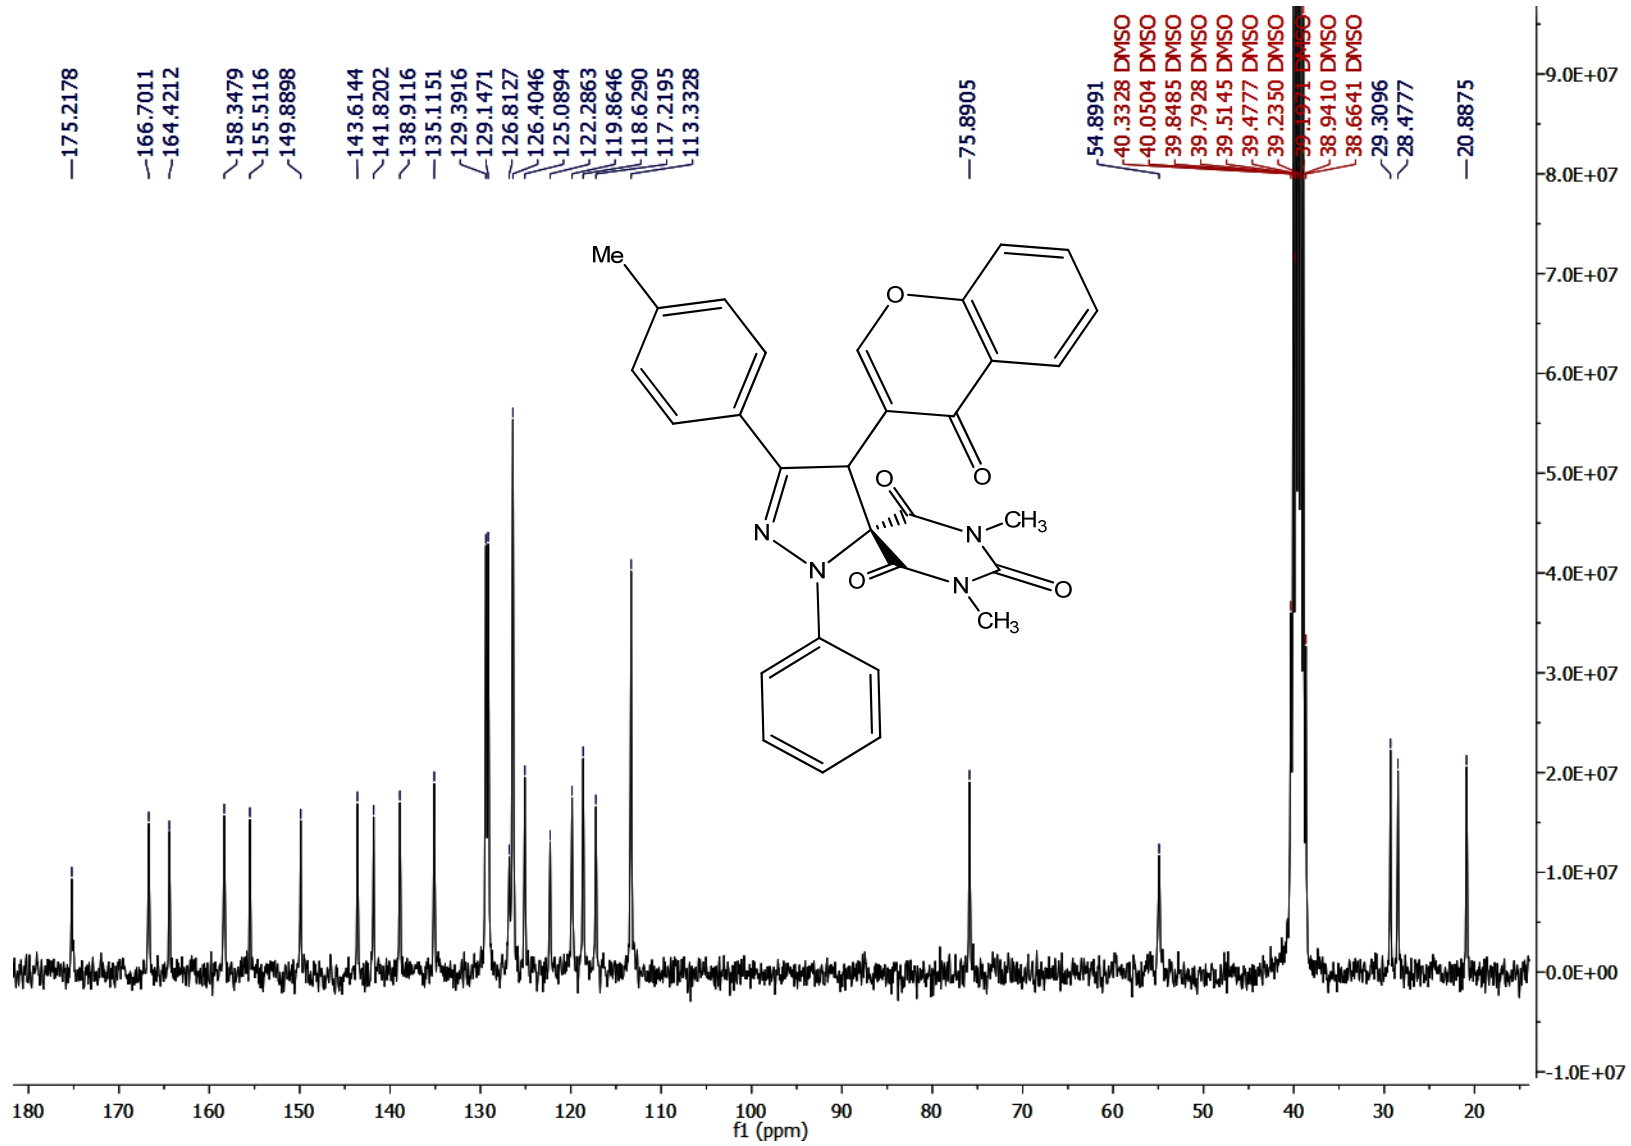

$^{13}\text{C}\{^1\text{H}\}$  NMR (DMSO, 75 MHz) spectrum of **3d**

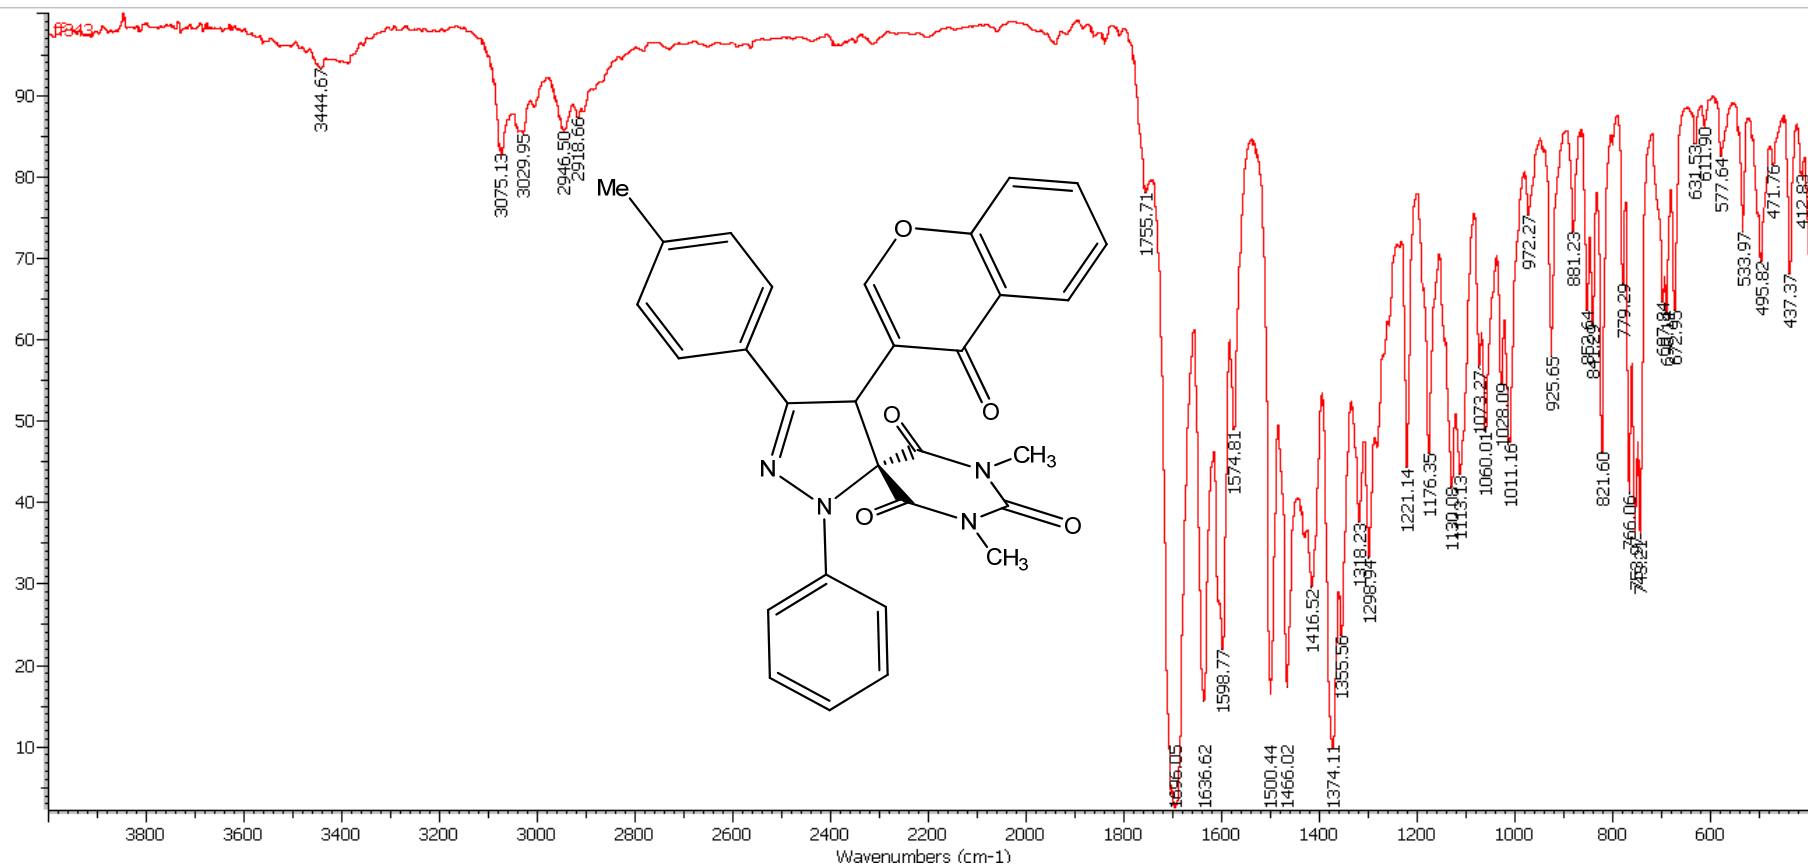

IR of 3d

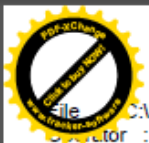

File : C:\MSDCHEM\3\DATA\Snapshot\FF343.d  
Acquired : 6 Oct 2020 16:51 using AcqMethod default.597x.m  
Instrument : Direct Probe  
Sample Name :  
Misc Info :  
Vial Number: 1

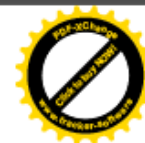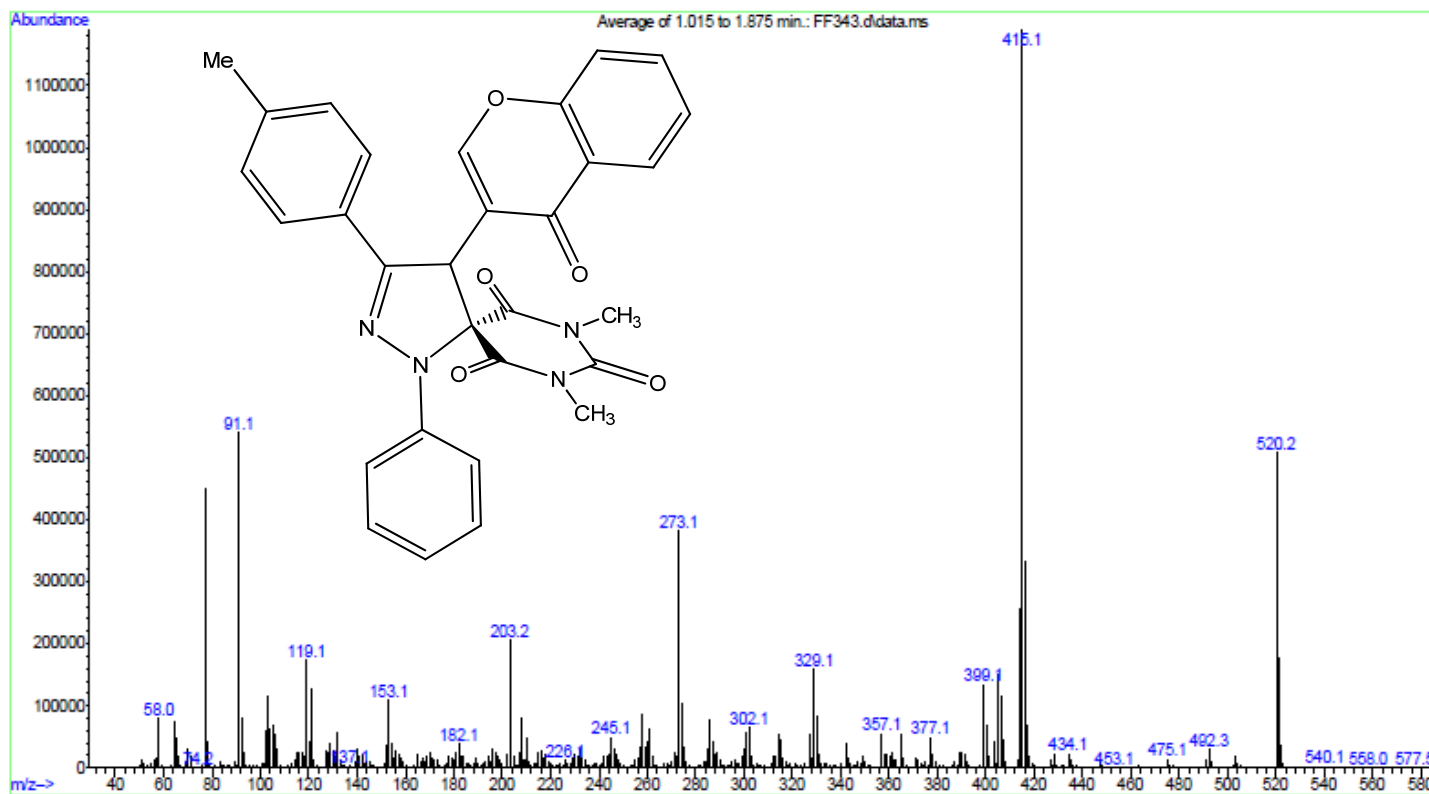

Mass of compound **3d**

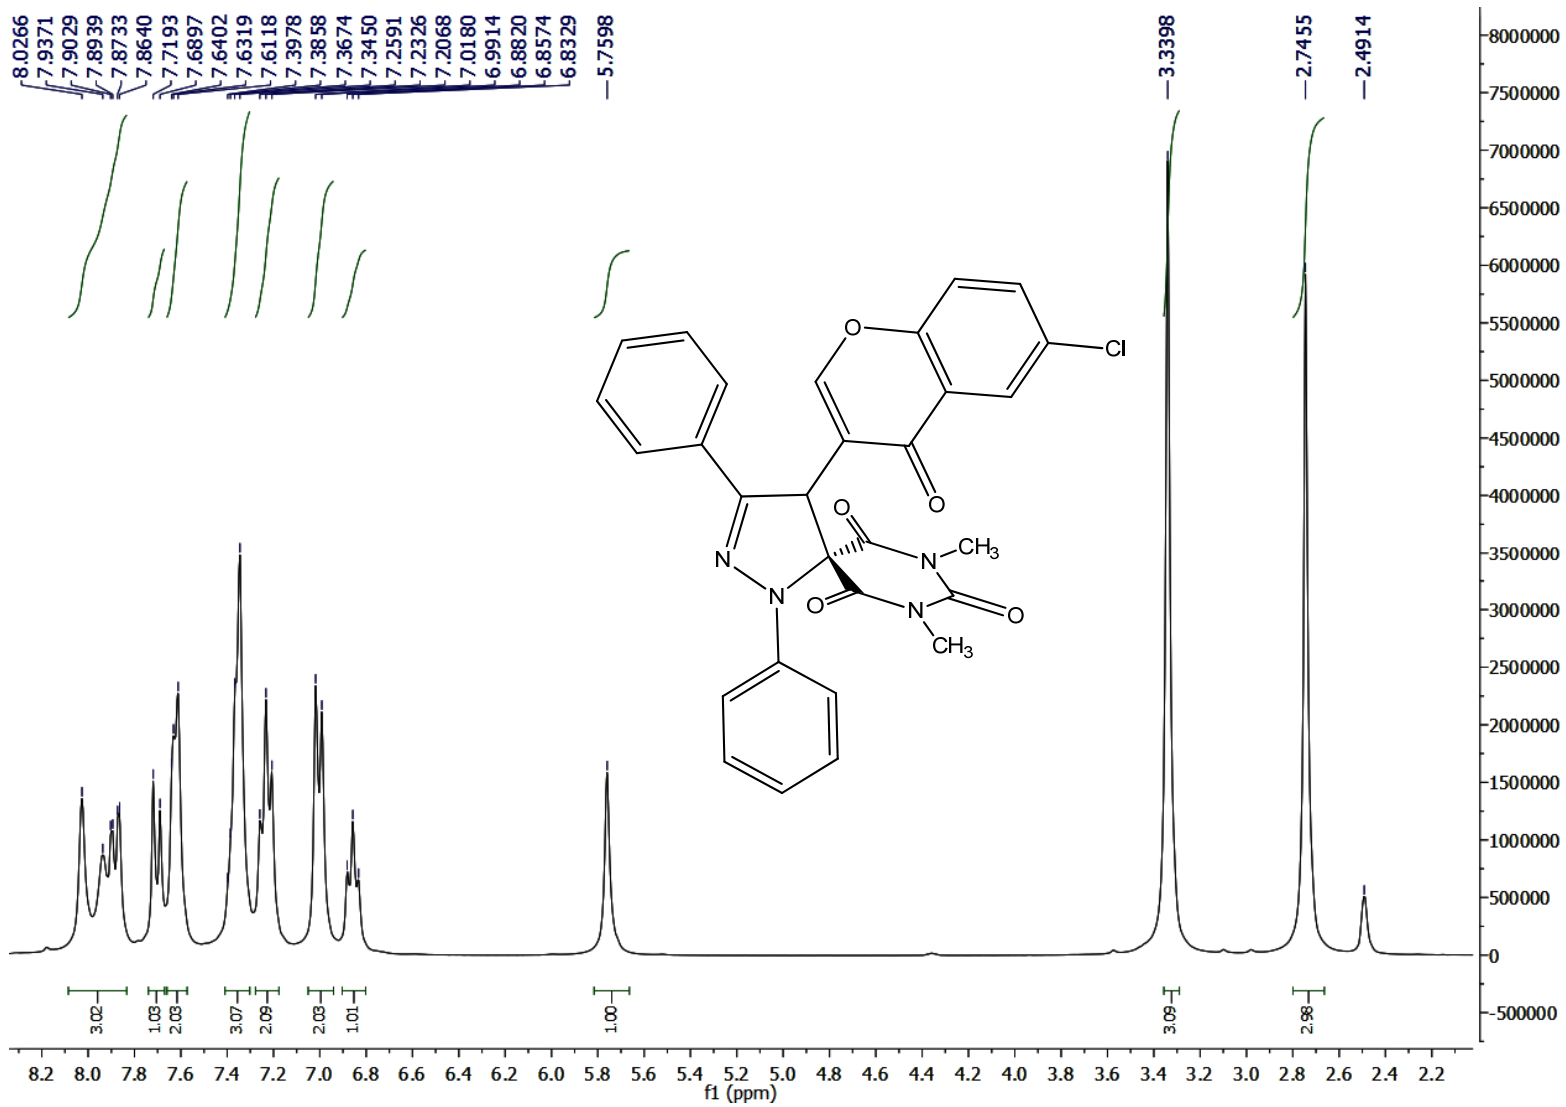

<sup>1</sup>H NMR (DMSO, 300 MHz) spectrum of **3e**



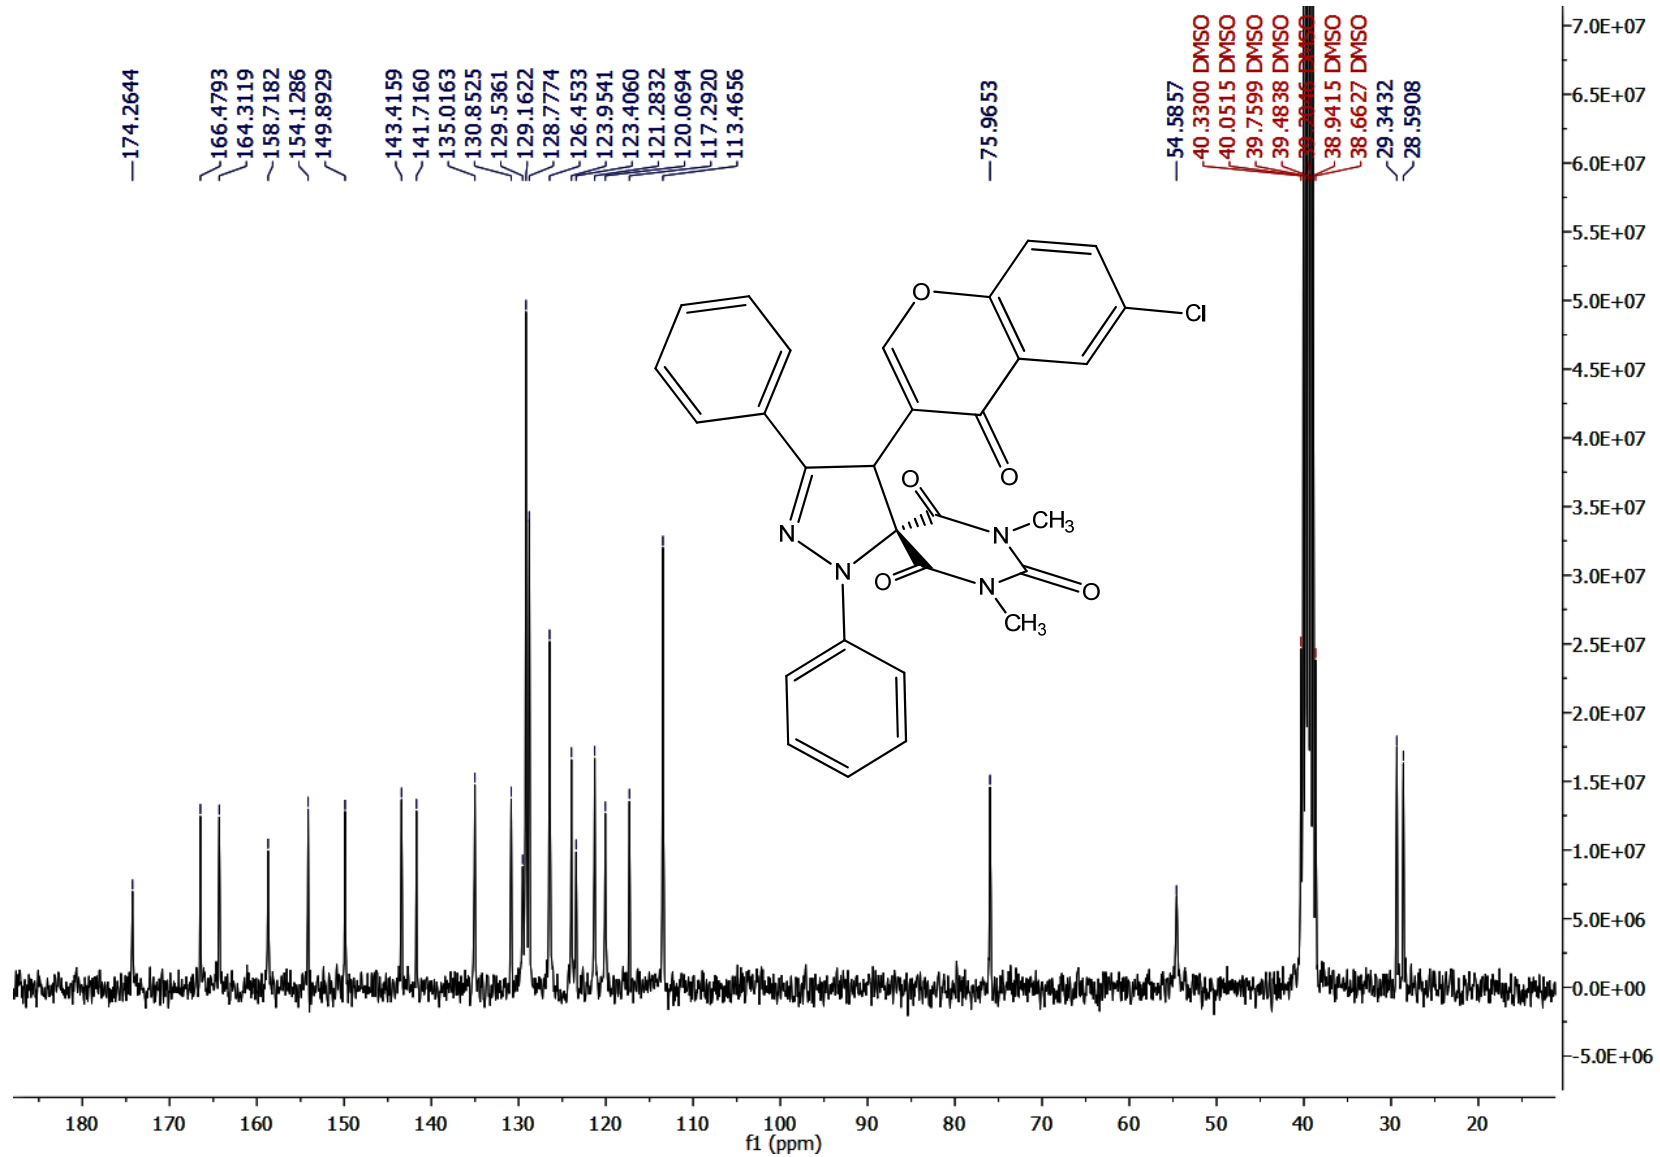

$^{13}\text{C}\{^1\text{H}\}$  NMR (DMSO, 75 MHz) spectrum of **3e**

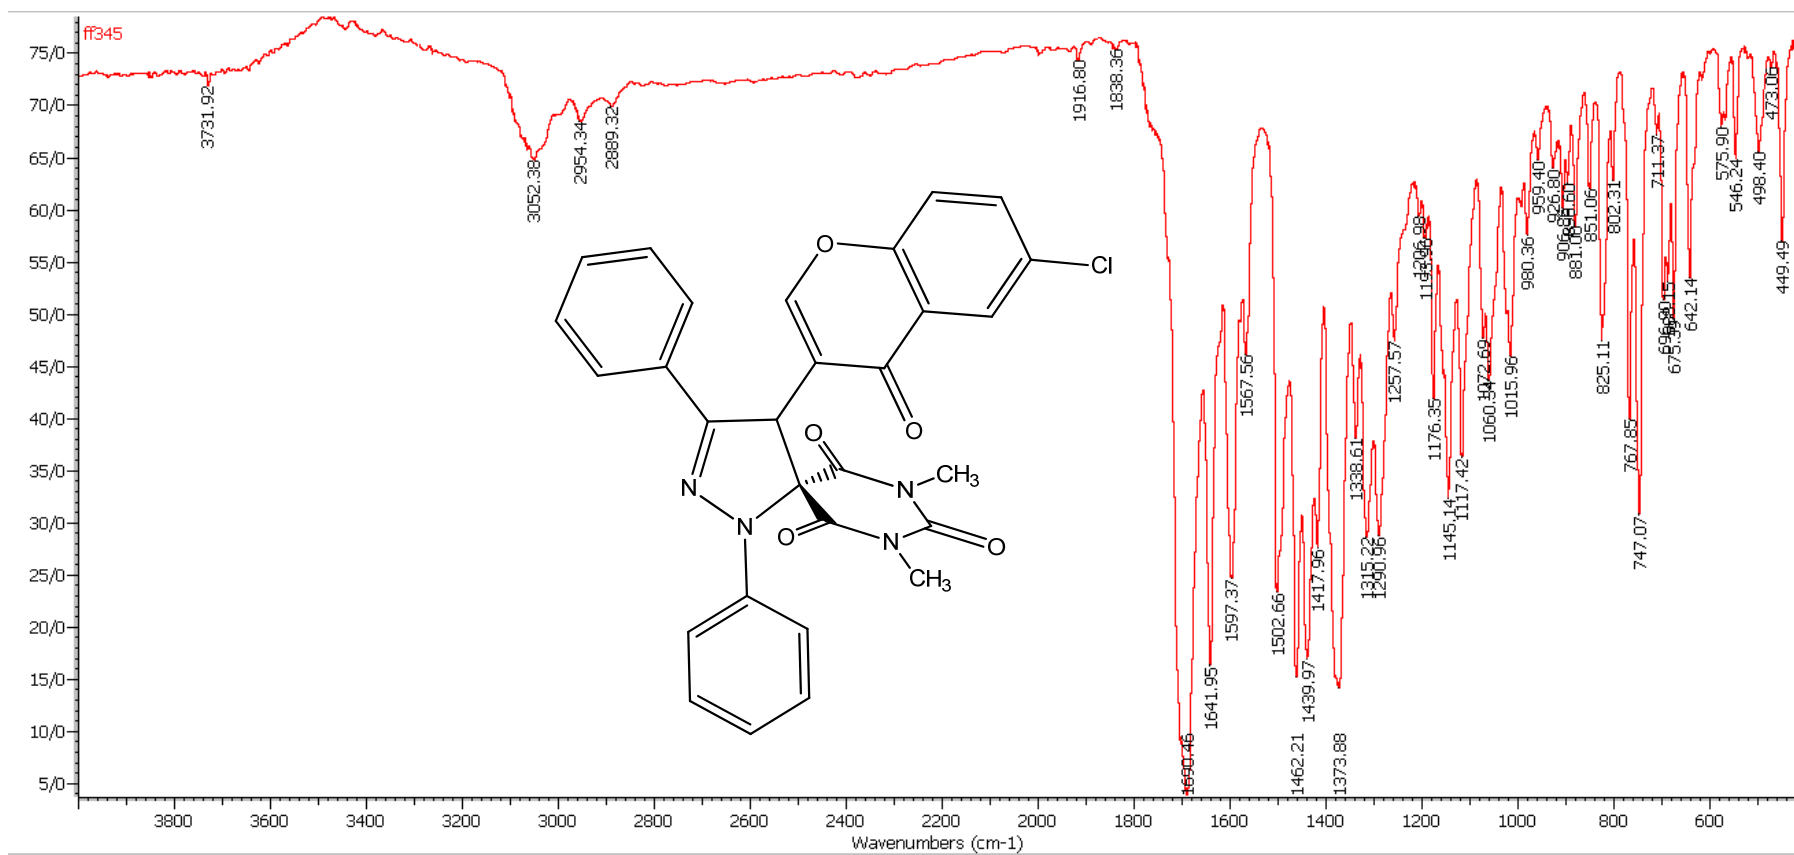

IR of 3e

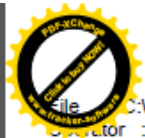

File : C:\MSDCHEM\3\DATA\Snapshot\FF345.d  
Operator :  
Acquired : 6 Oct 2020 16:39 using AcqMethod default.597x.m  
Instrument : Direct Probe  
Sample Name:  
Misc Info :  
Vial Number: 1

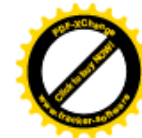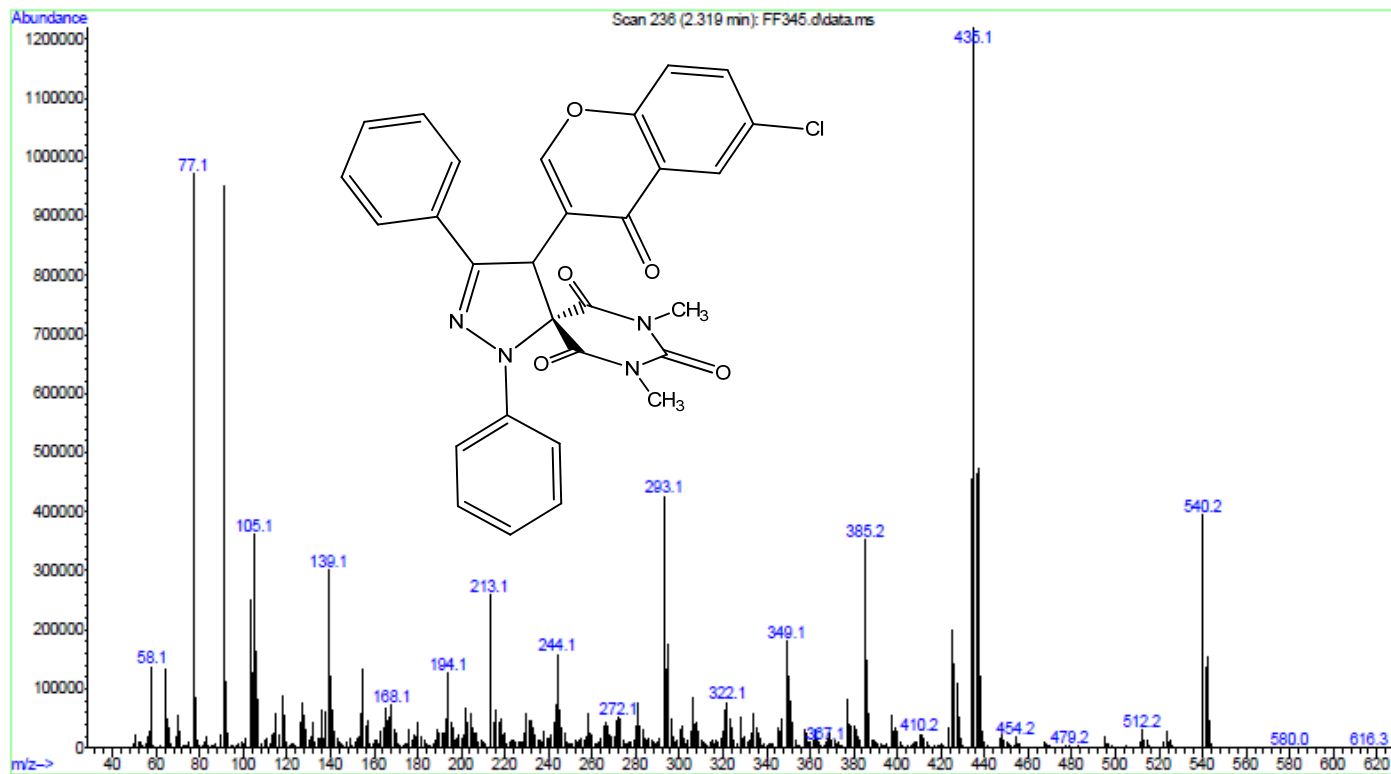

Mass of compound 3e

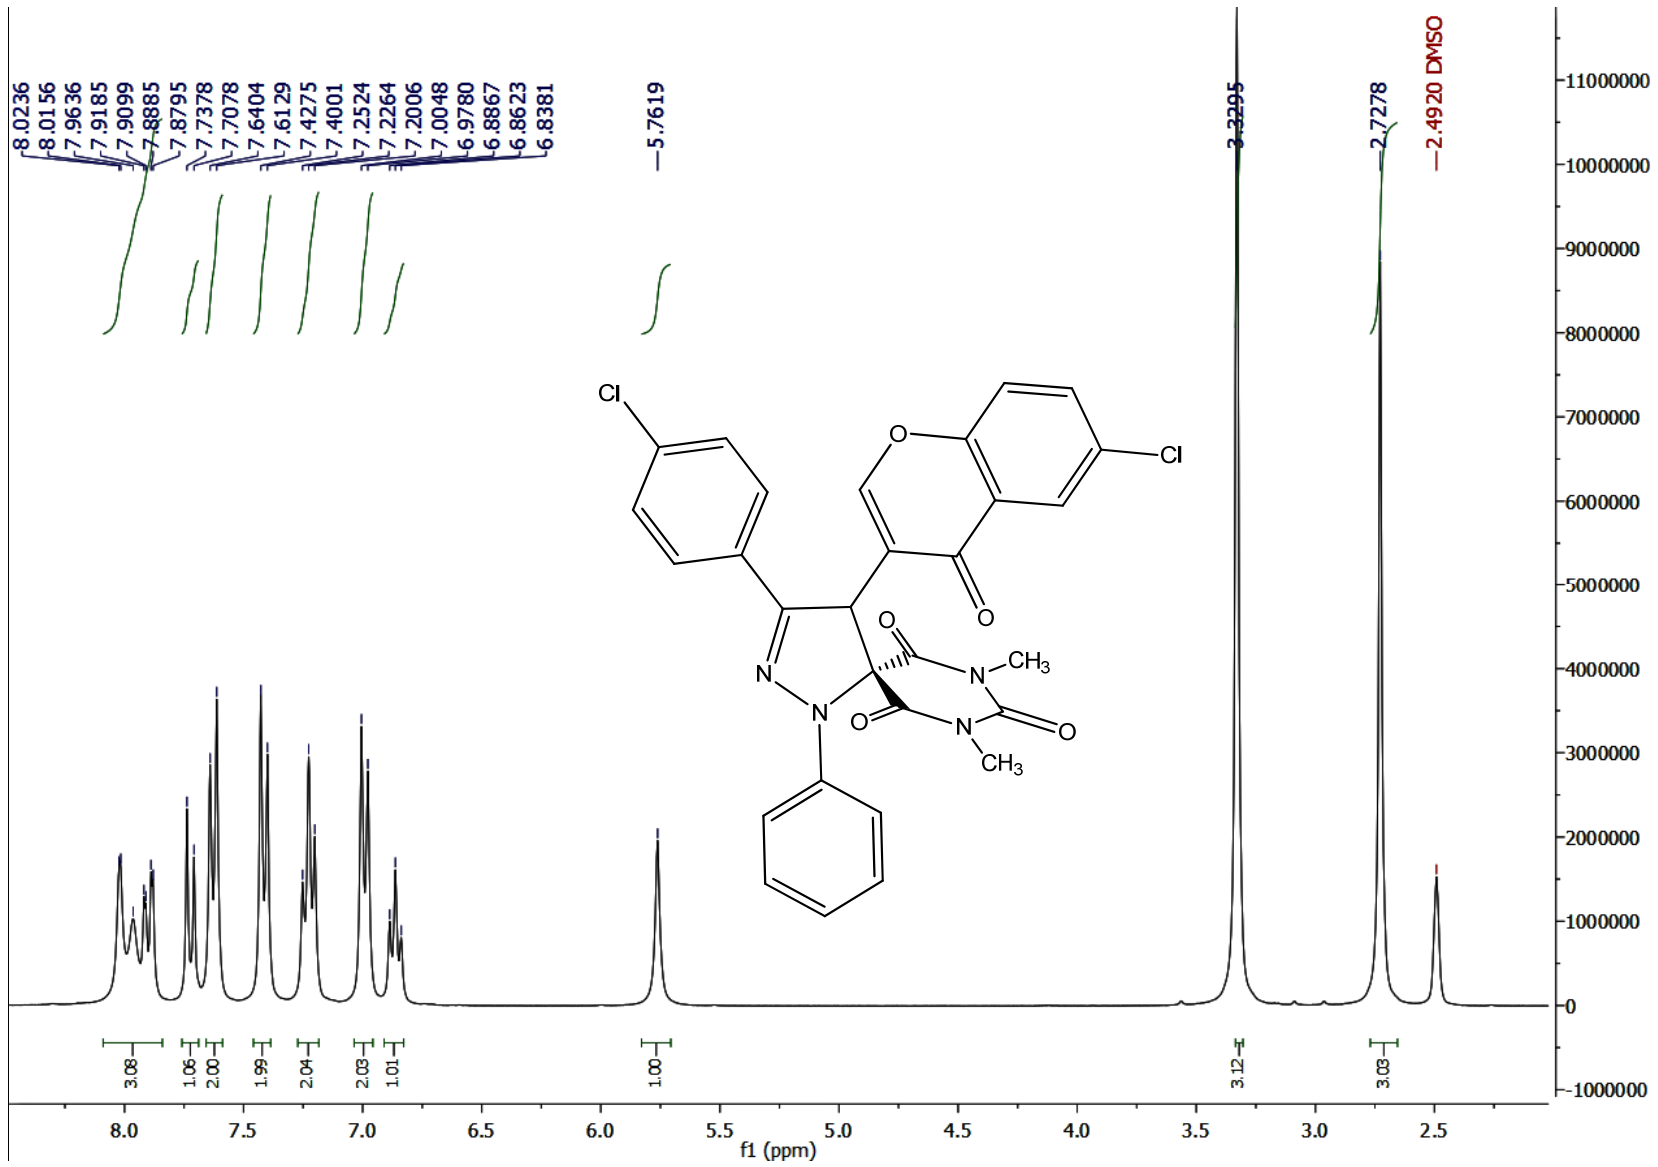

<sup>1</sup>H NMR (DMSO, 300 MHz) spectrum of **3f**

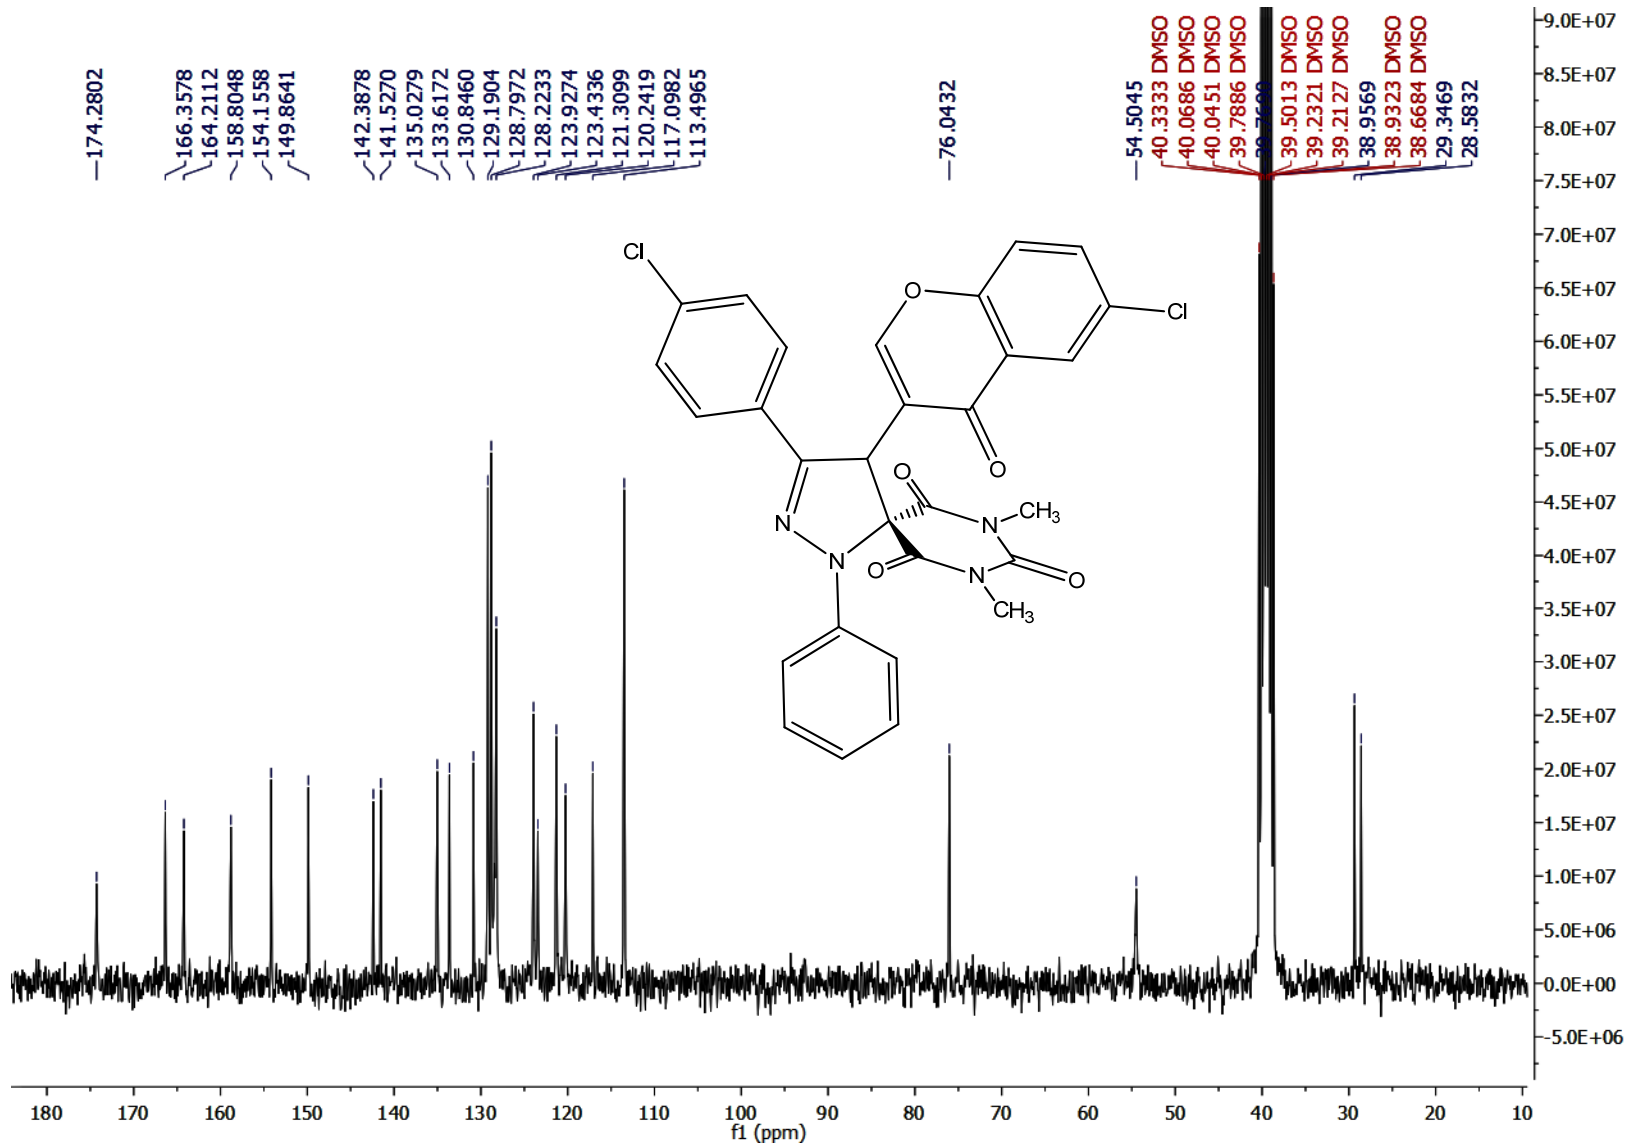

$^{13}\text{C}\{^1\text{H}\}$  NMR (DMSO, 75 MHz) spectrum of **3f**

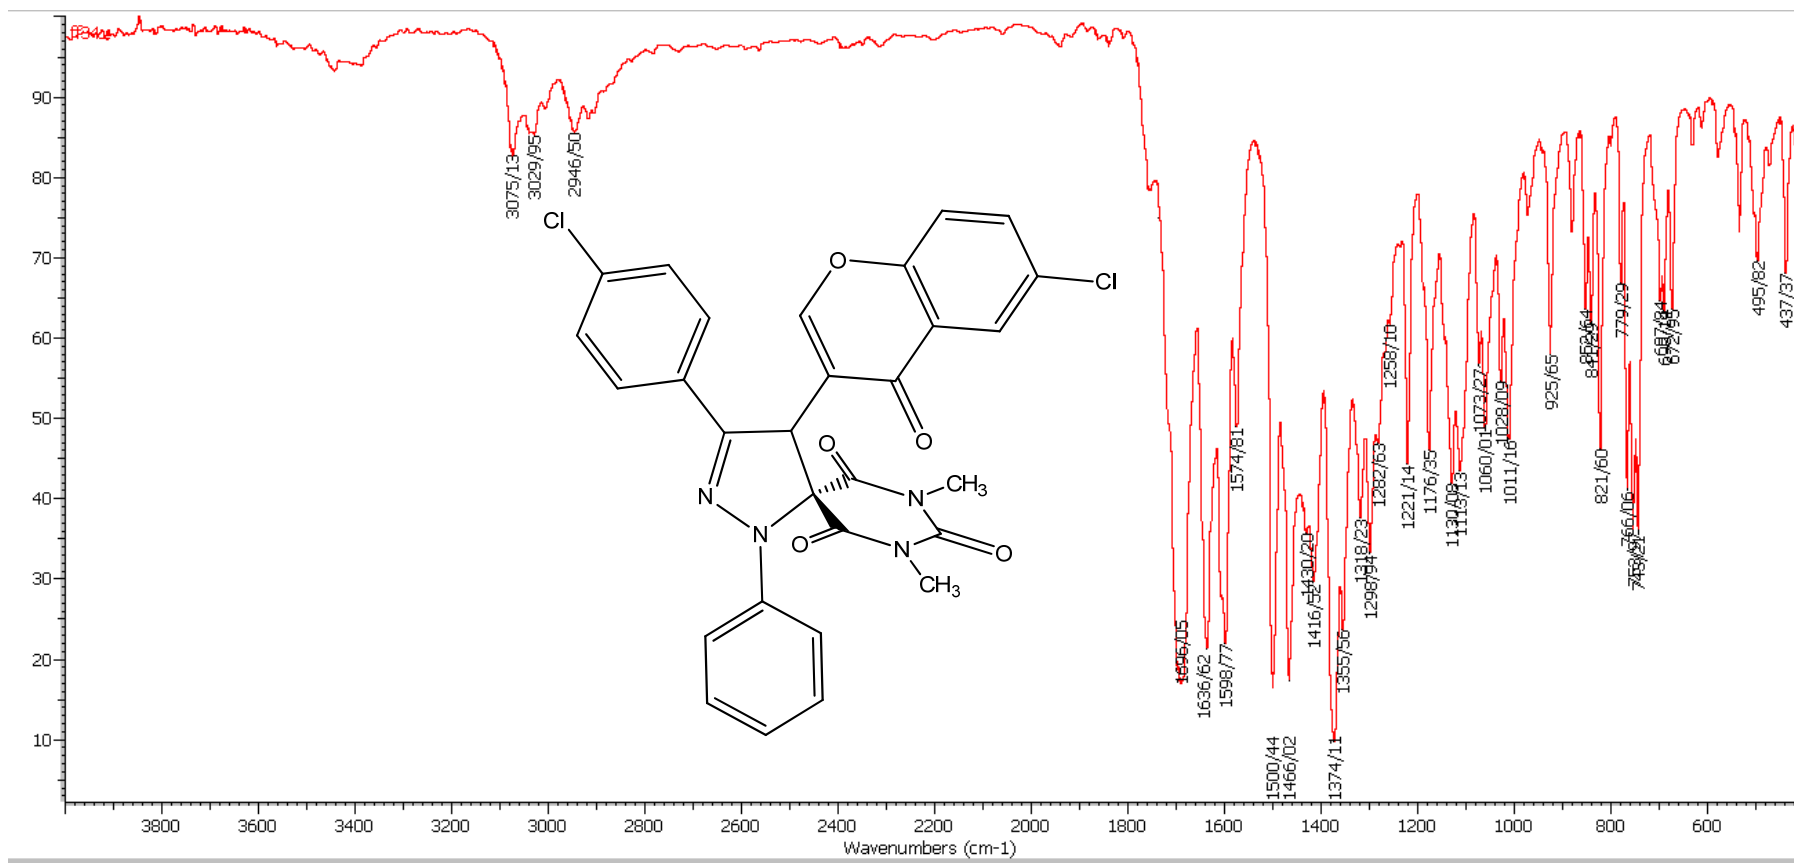

IR of 3f

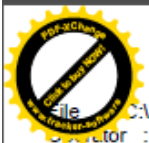

File : C:\MSDCHEM\3\DATA\Snapshot\FF346.d  
Operator :  
Acquired : 6 Oct 2020 16:58 using AcqMethod default.597x.m  
Instrument : Direct Probe  
Sample Name :  
Misc Info :  
Vial Number: 1

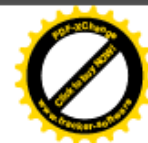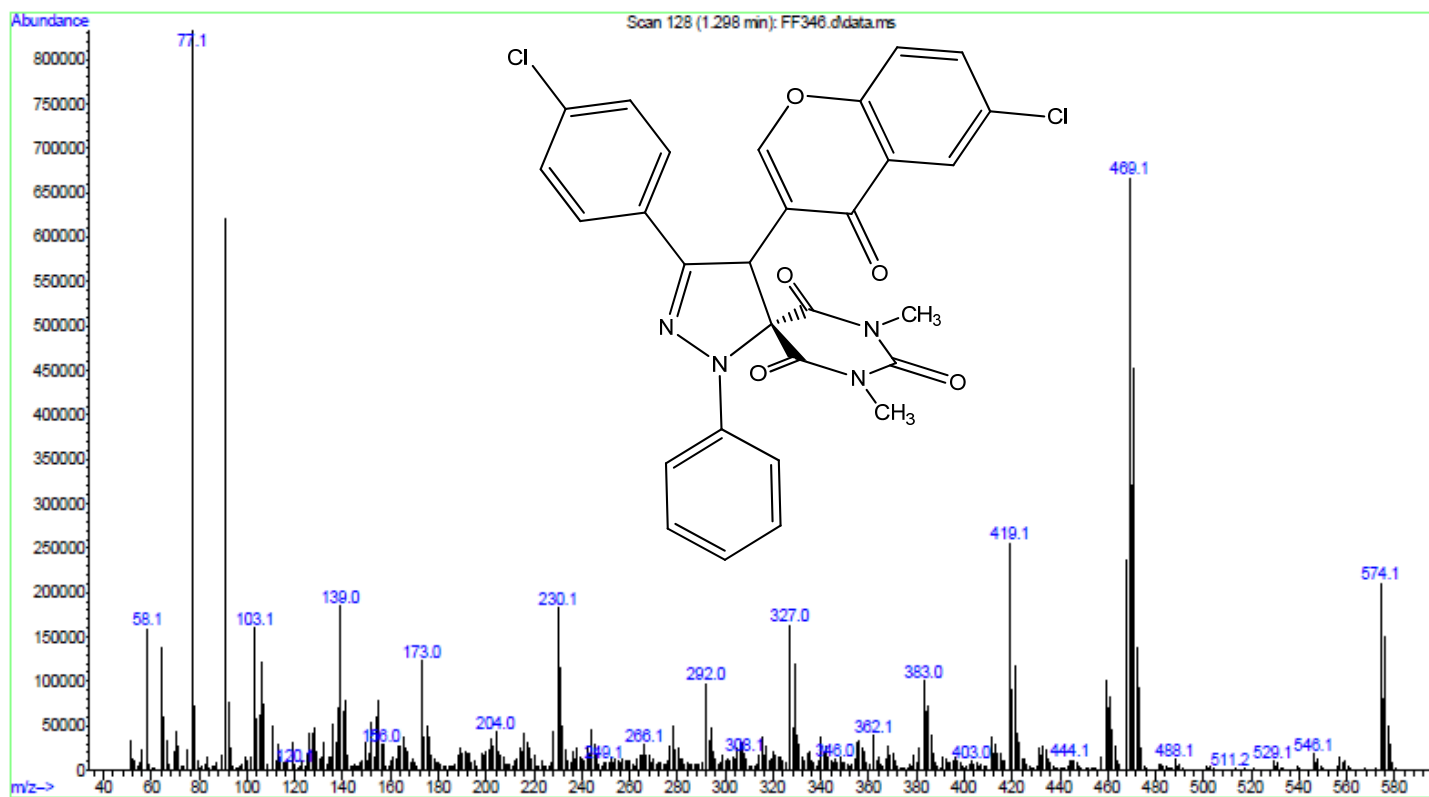

Mass of compound 3f

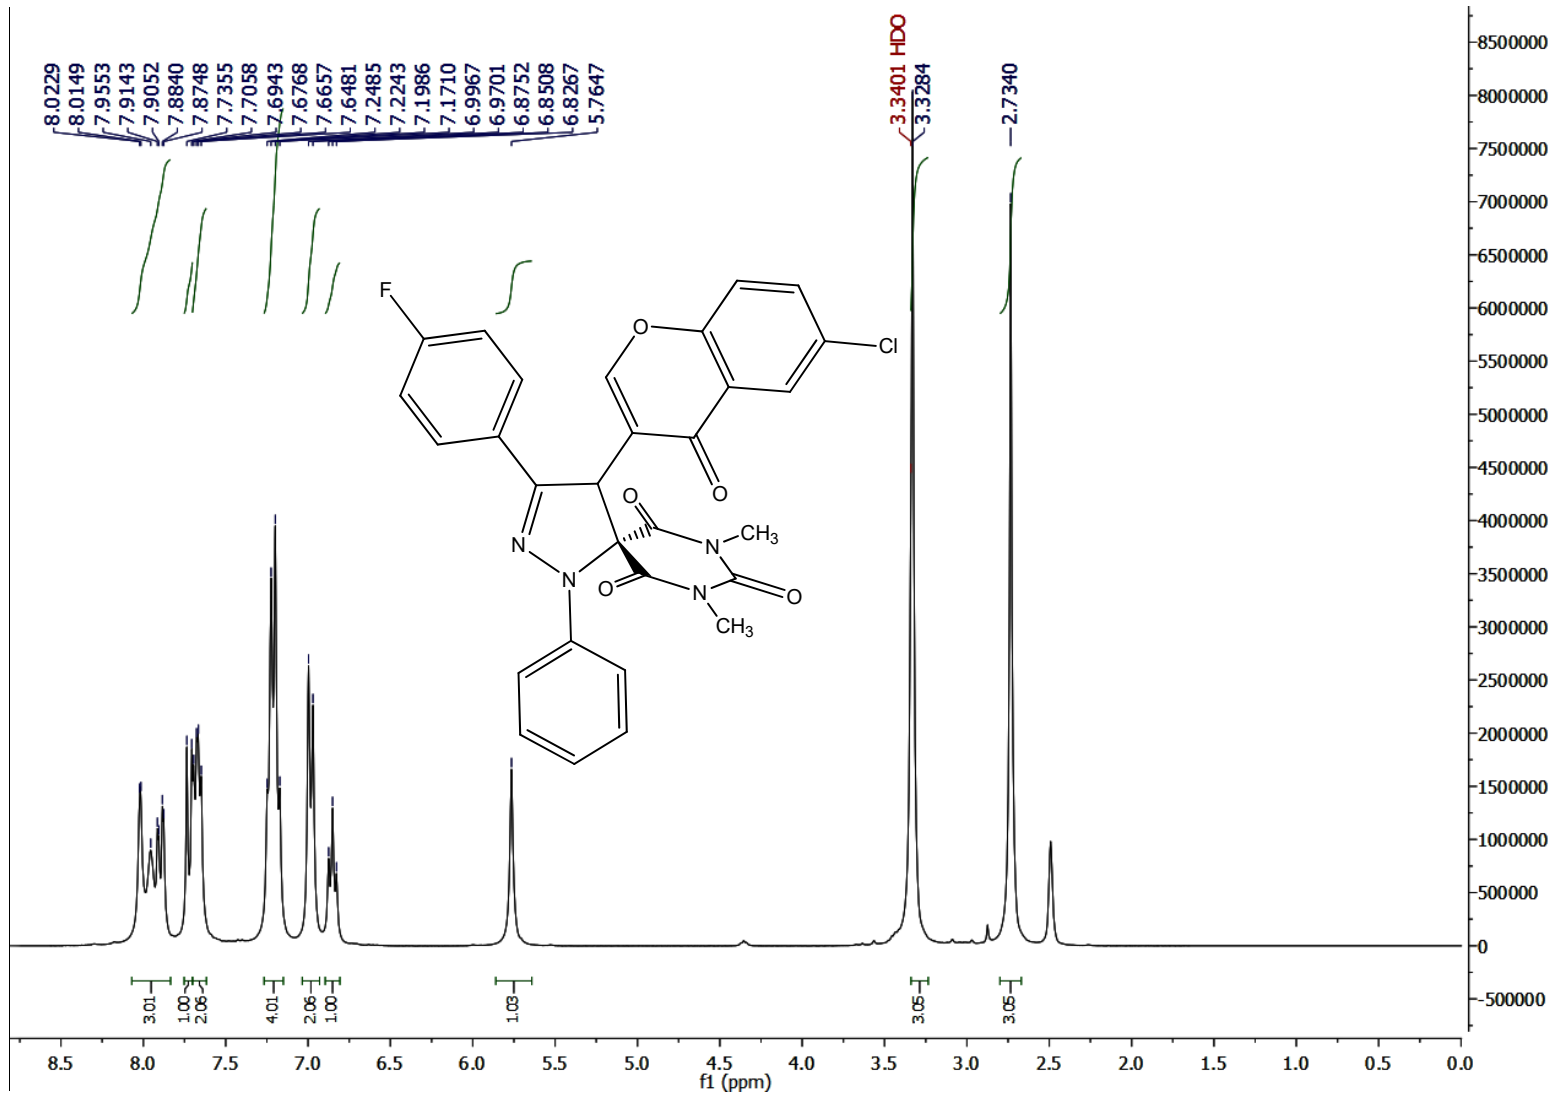

<sup>1</sup>H NMR (DMSO, 300 MHz) spectrum of **3g**



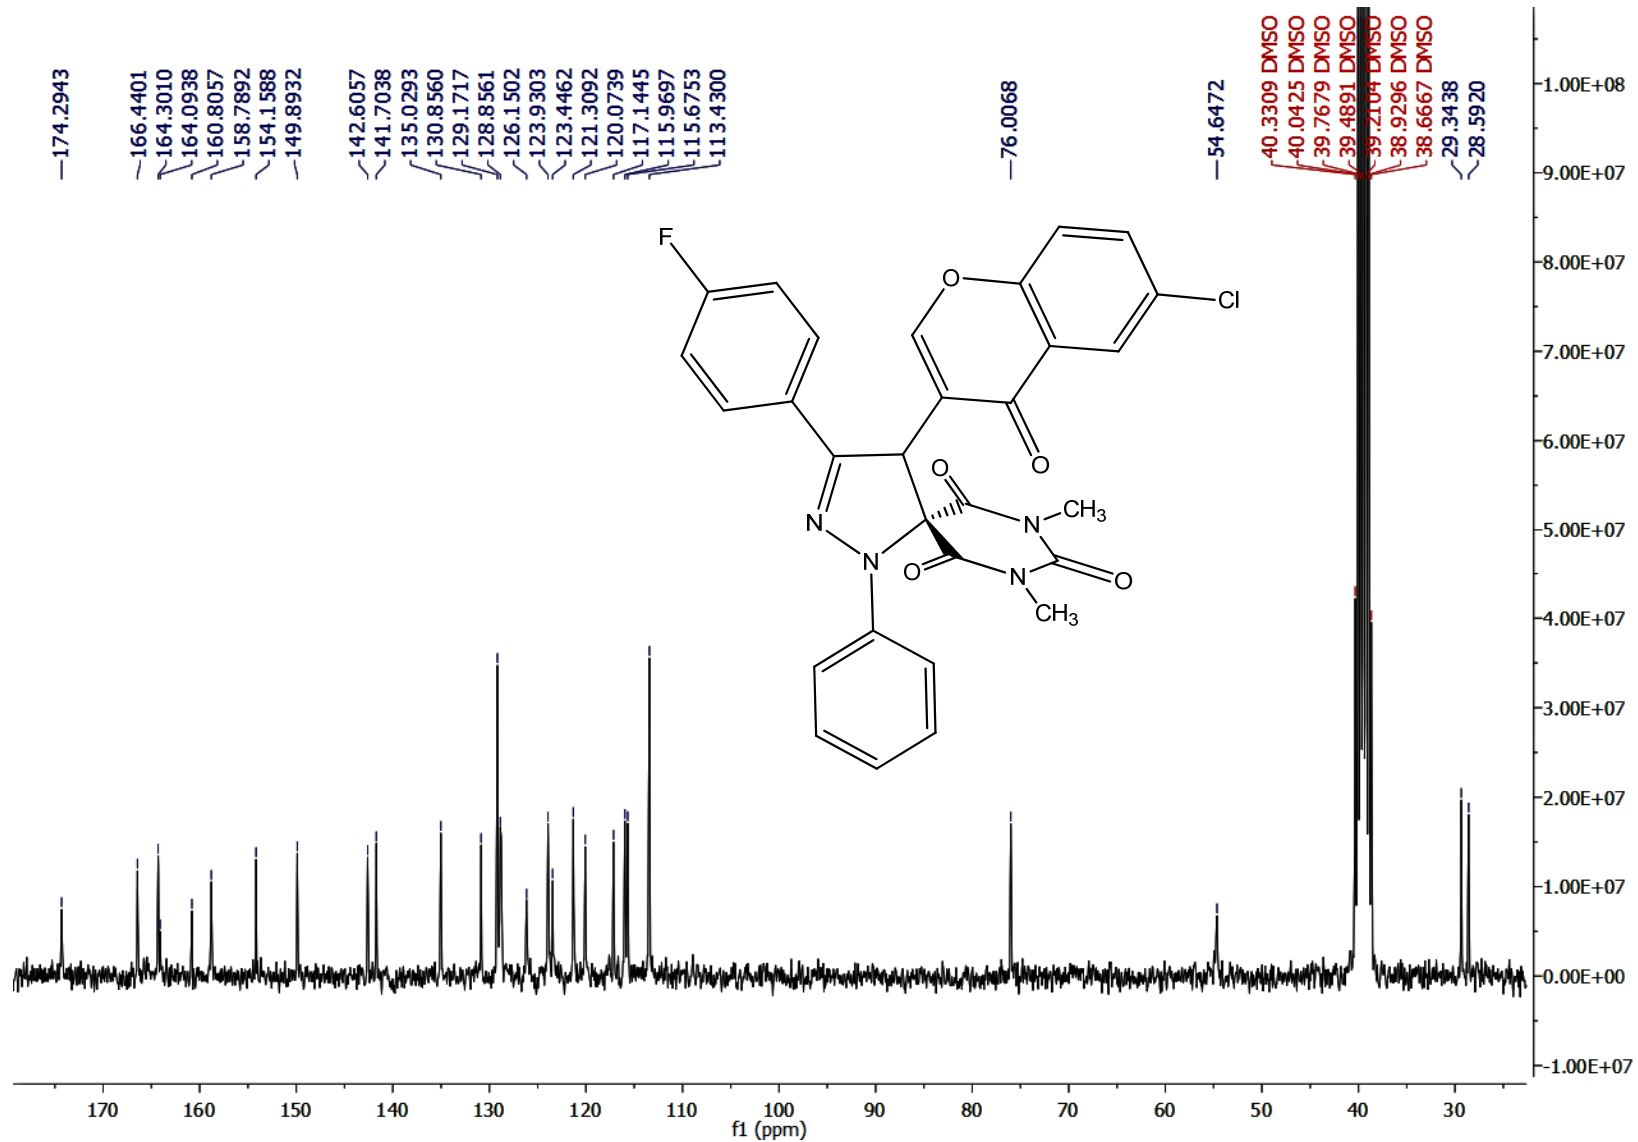

$^{13}\text{C}\{^1\text{H}\}$  NMR (DMSO, 75 MHz) spectrum of **3g**

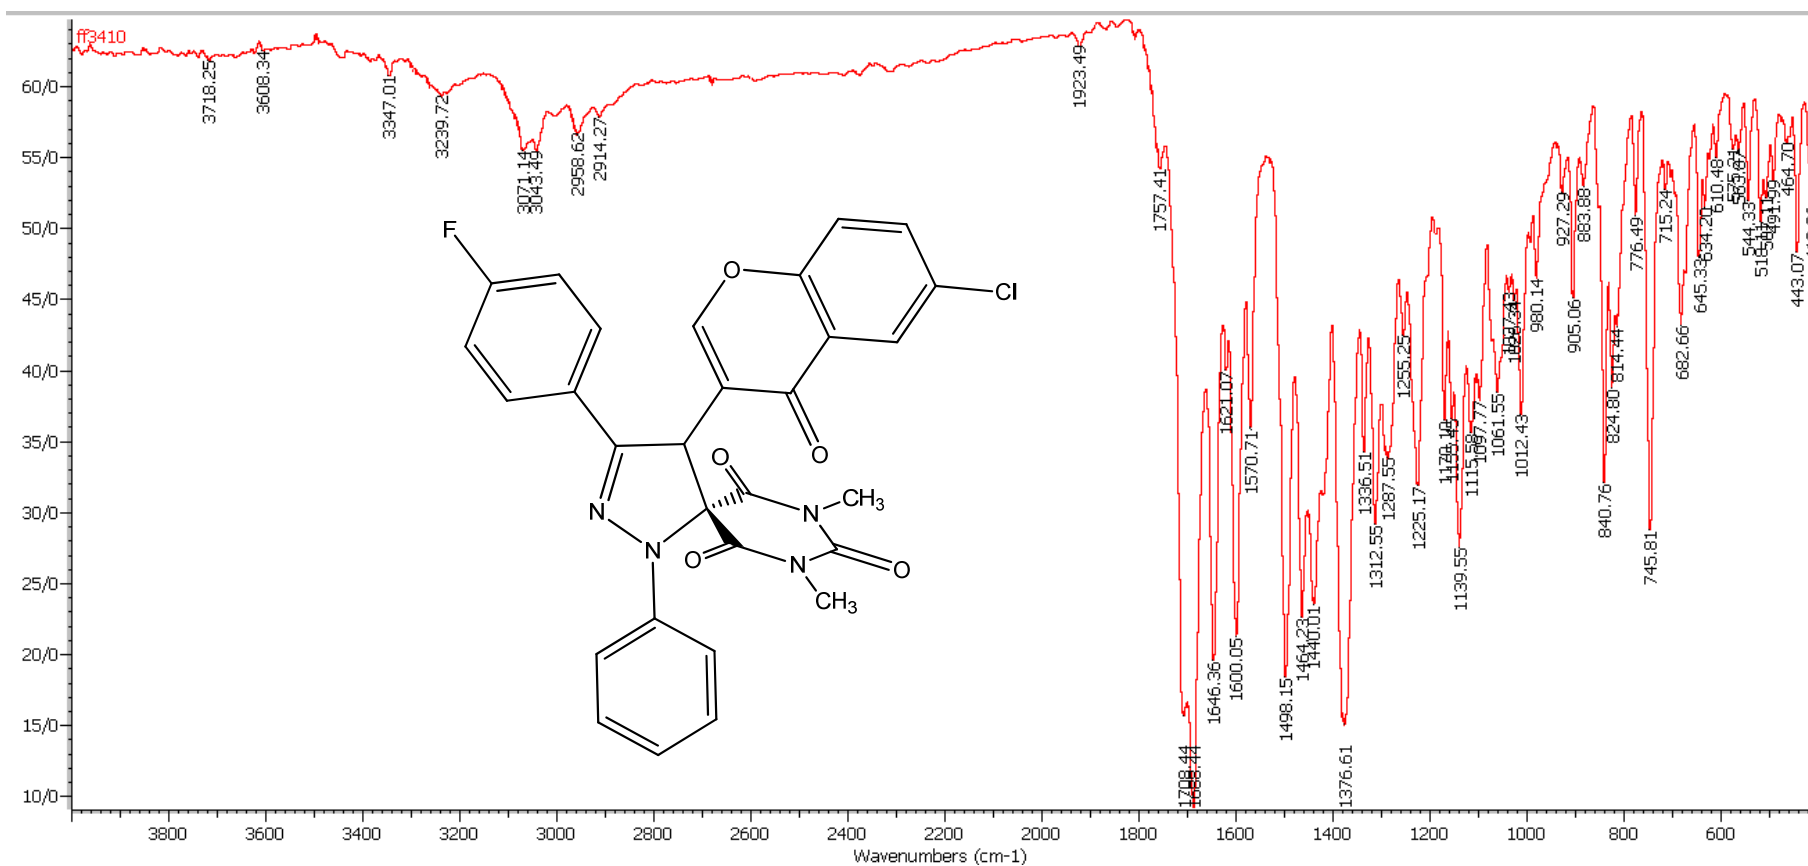

IR of 3g

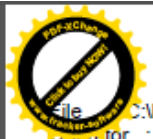

File : C:\MSDCHEM\3\DATA\Snapshot\FF3410.d  
Operator :  
Acquired : 6 Oct 2020 16:43 using AcqMethod default.597x.m  
Instrument : Direct Probe  
Sample Name:  
Misc Info :  
Vial Number: 1

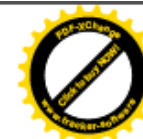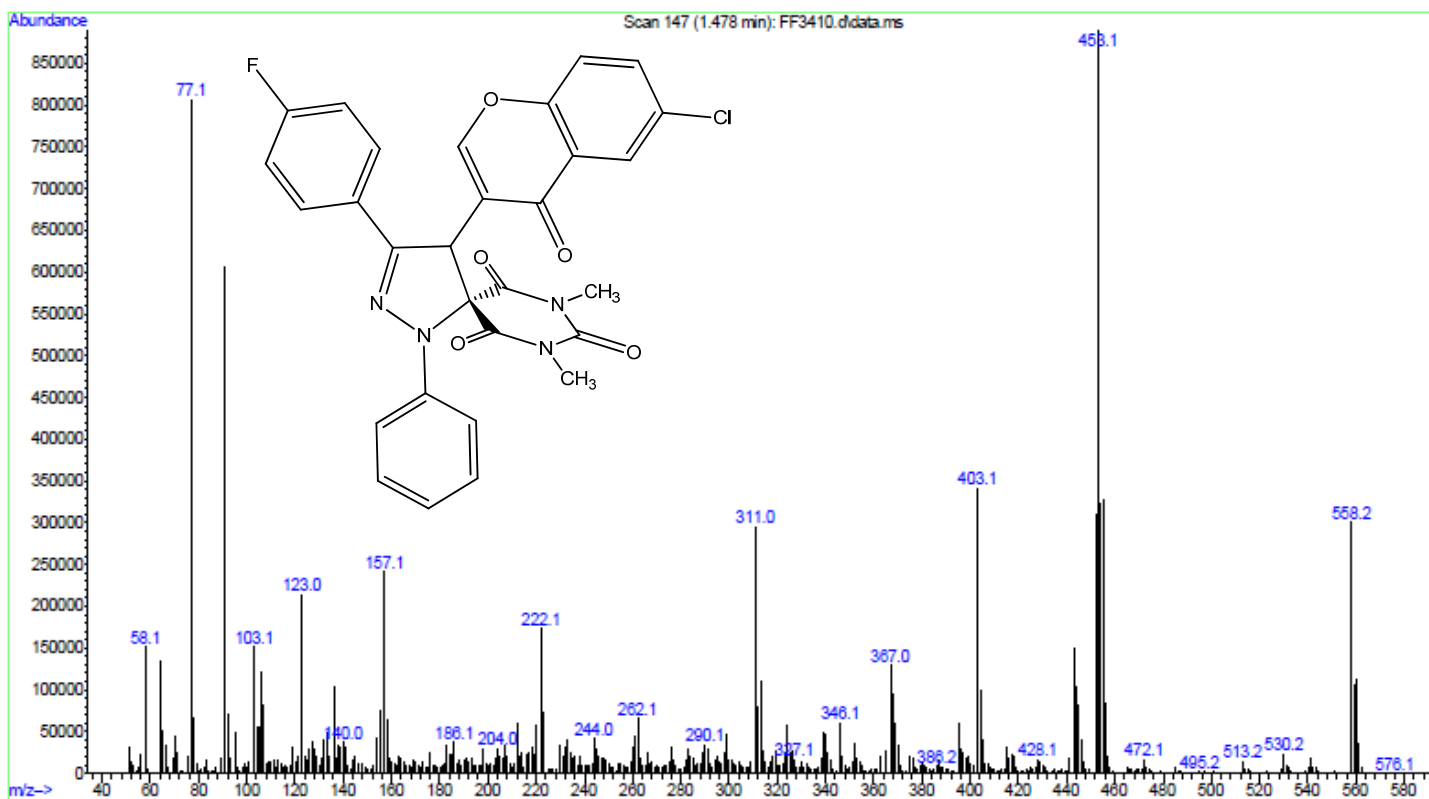

Mass of compound **3g**

S43

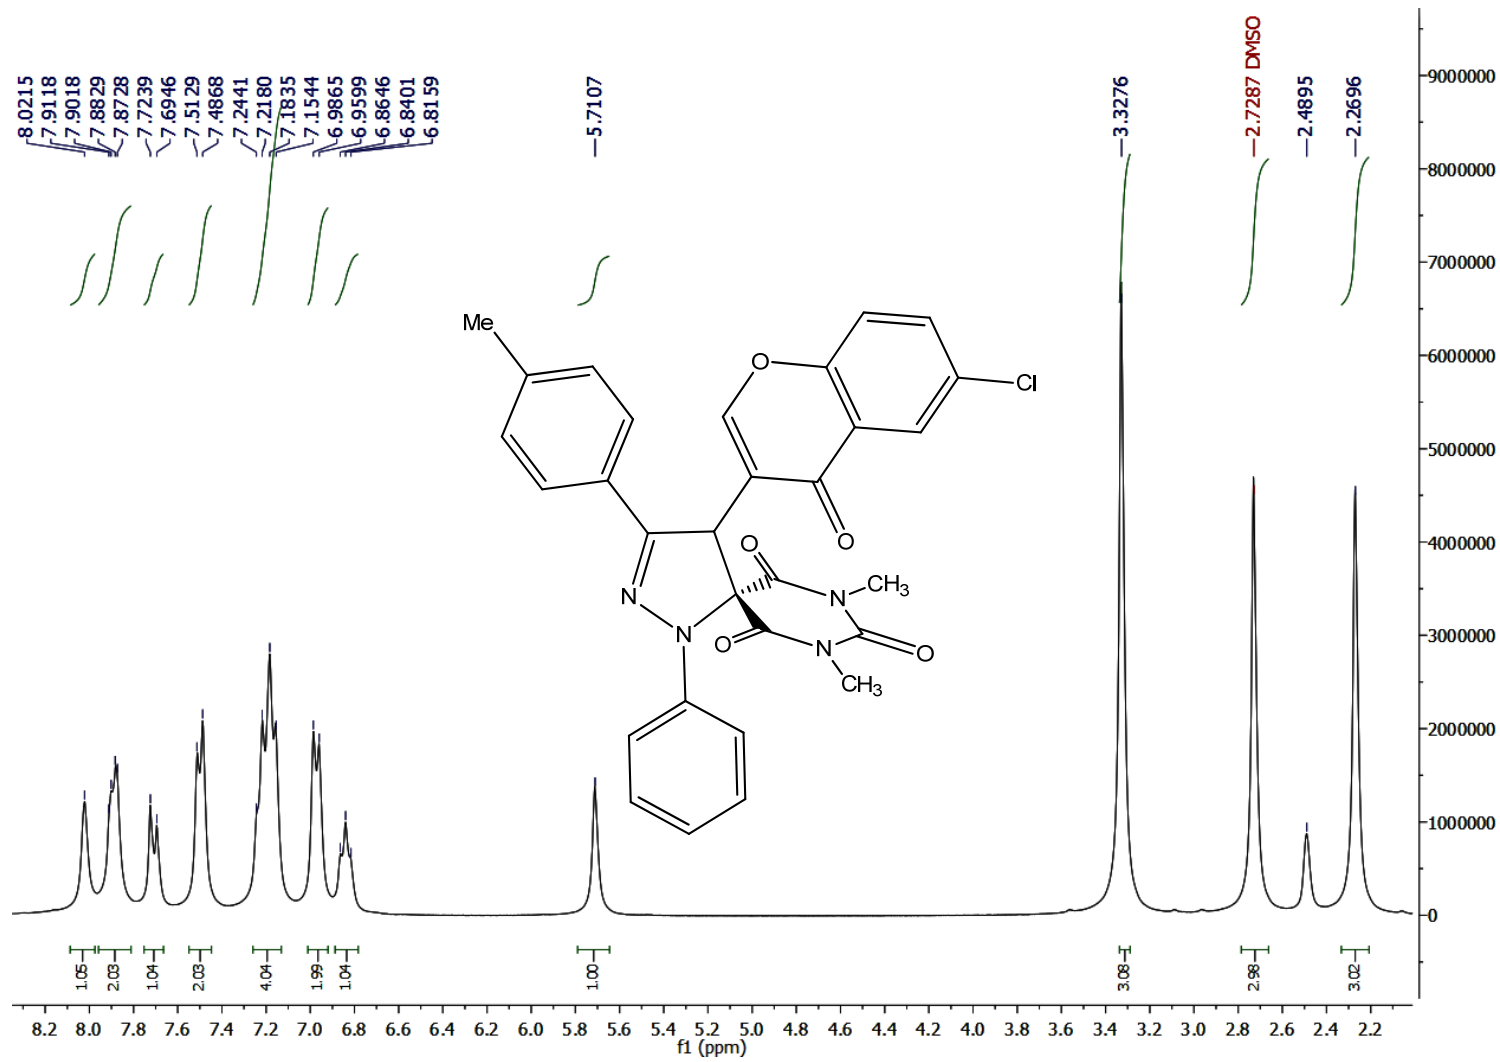

<sup>1</sup>H NMR (DMSO, 300 MHz) spectrum of **3h**

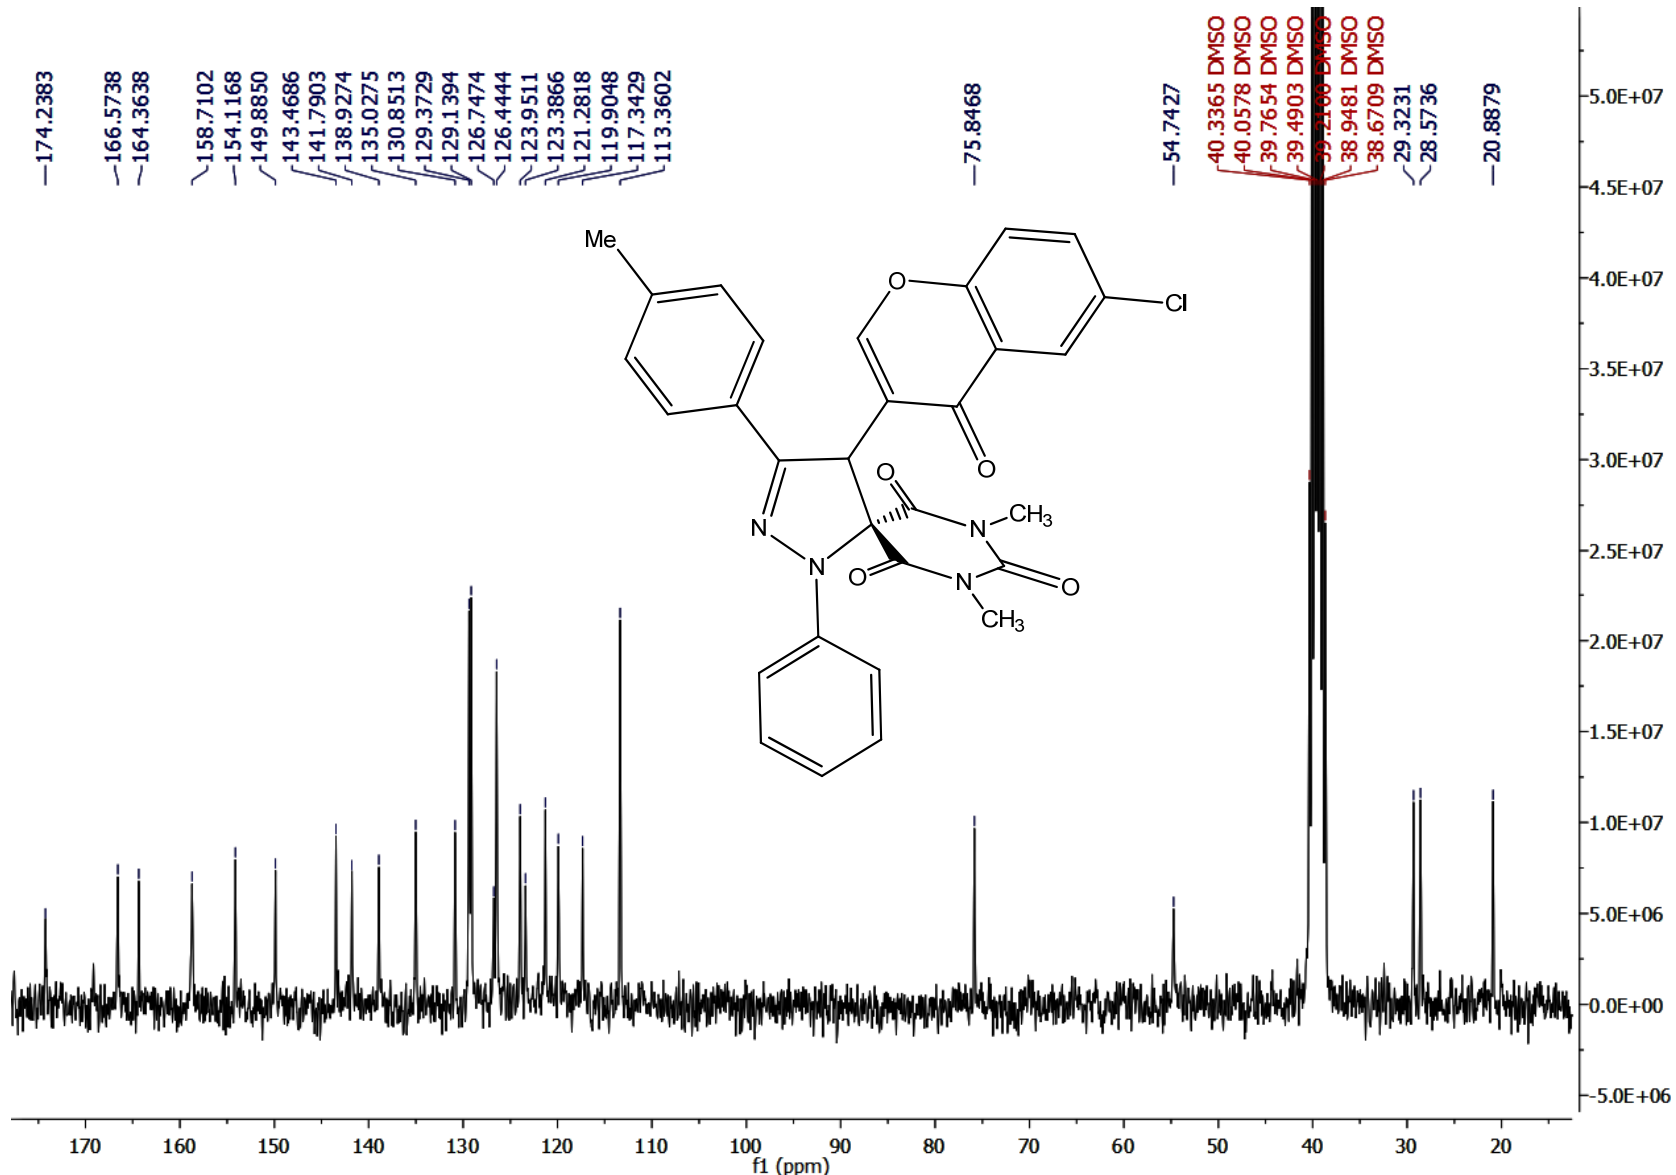

<sup>13</sup>C{<sup>1</sup>H} NMR (DMSO, 75 MHz) spectrum of **3h**

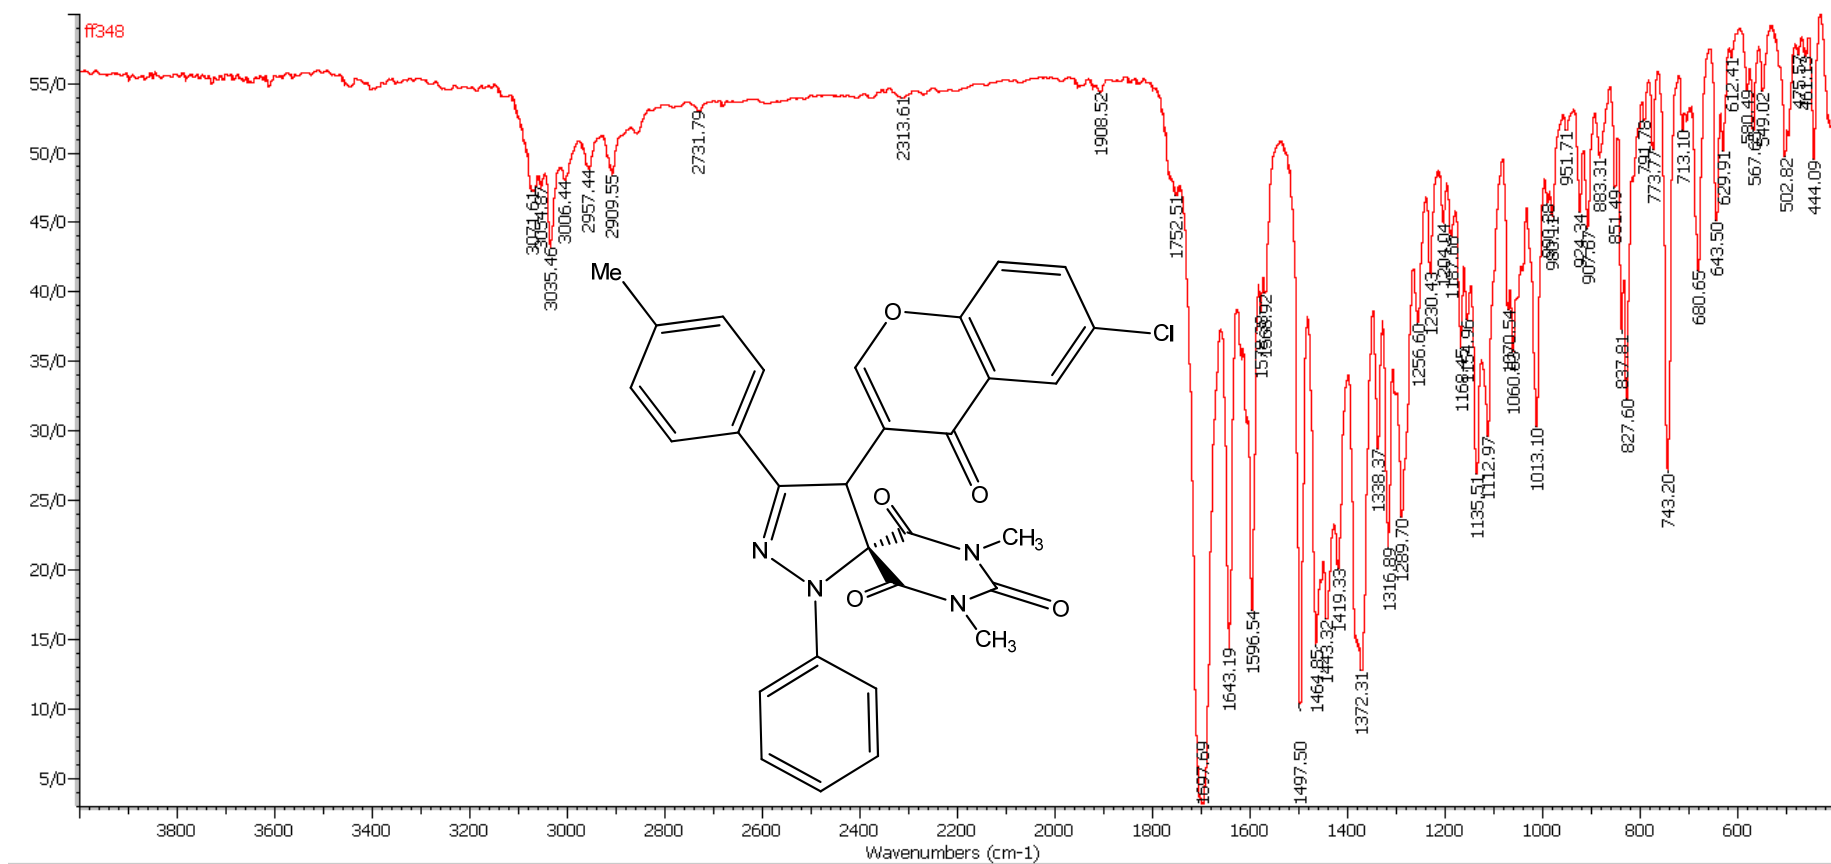

IR of 3h

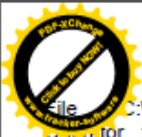

File : C:\MSDCHEM\3\DATA\Snapshot\FF348.d

Operator :

Acquired : 6 Oct 2020 16:35 using AcqMethod default.597x.m

Instrument : Direct Probe

Sample Name:

Misc Info :

Vial Number: 1

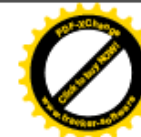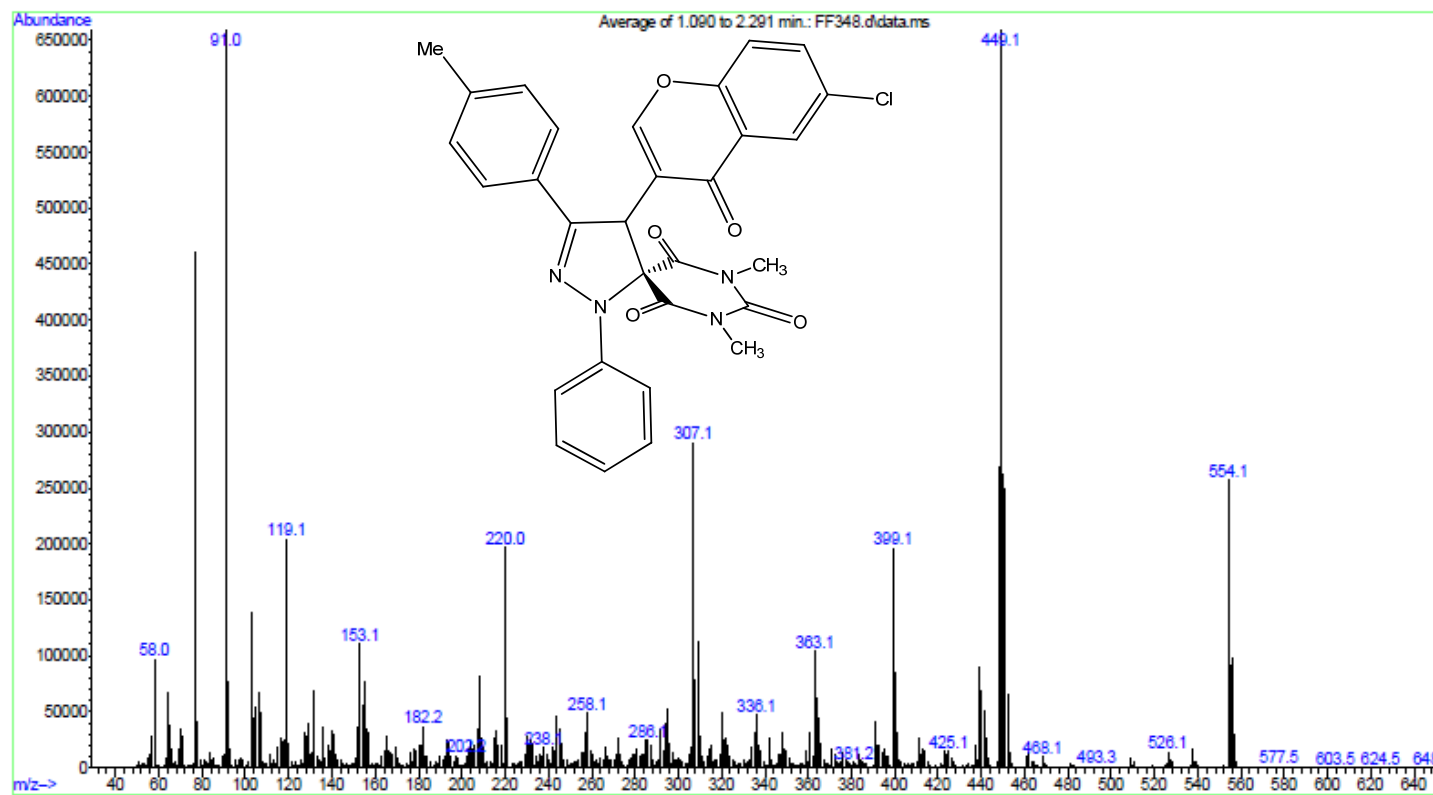

Mass of compound **3h**

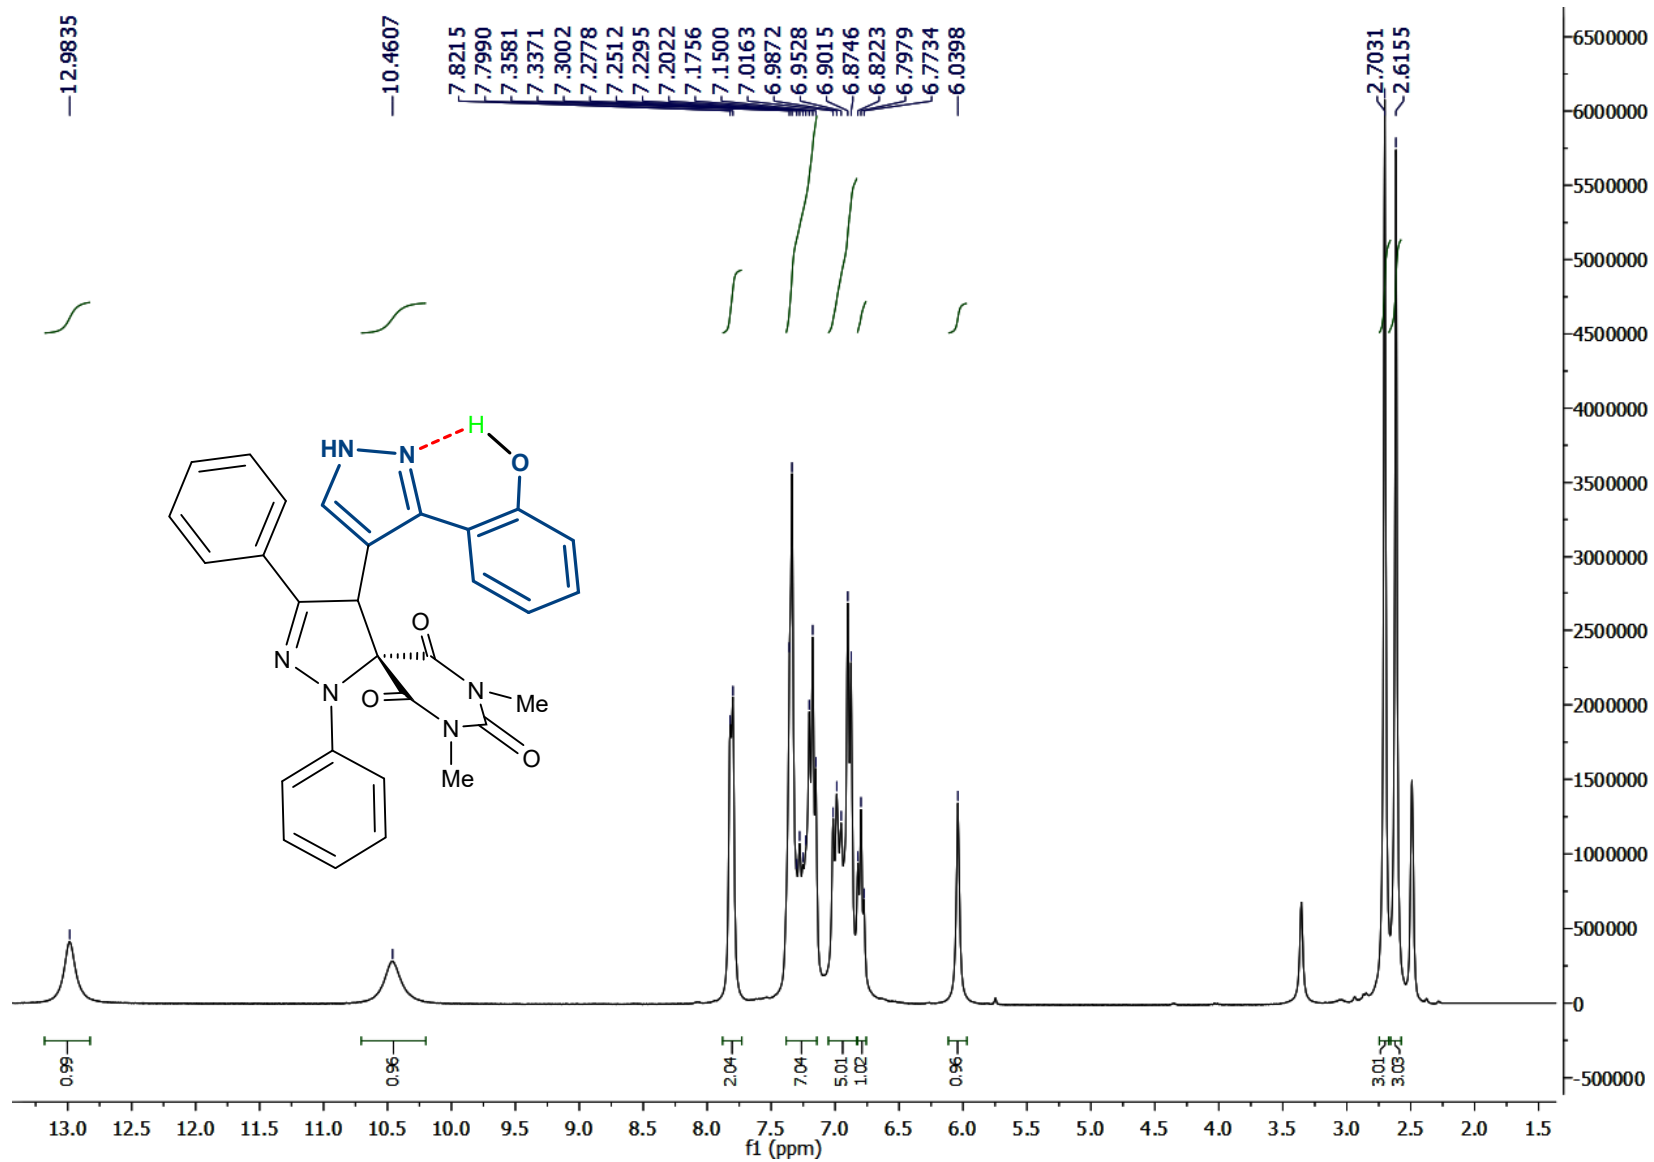

<sup>1</sup>H NMR (DMSO, 300 MHz) spectrum of 4a



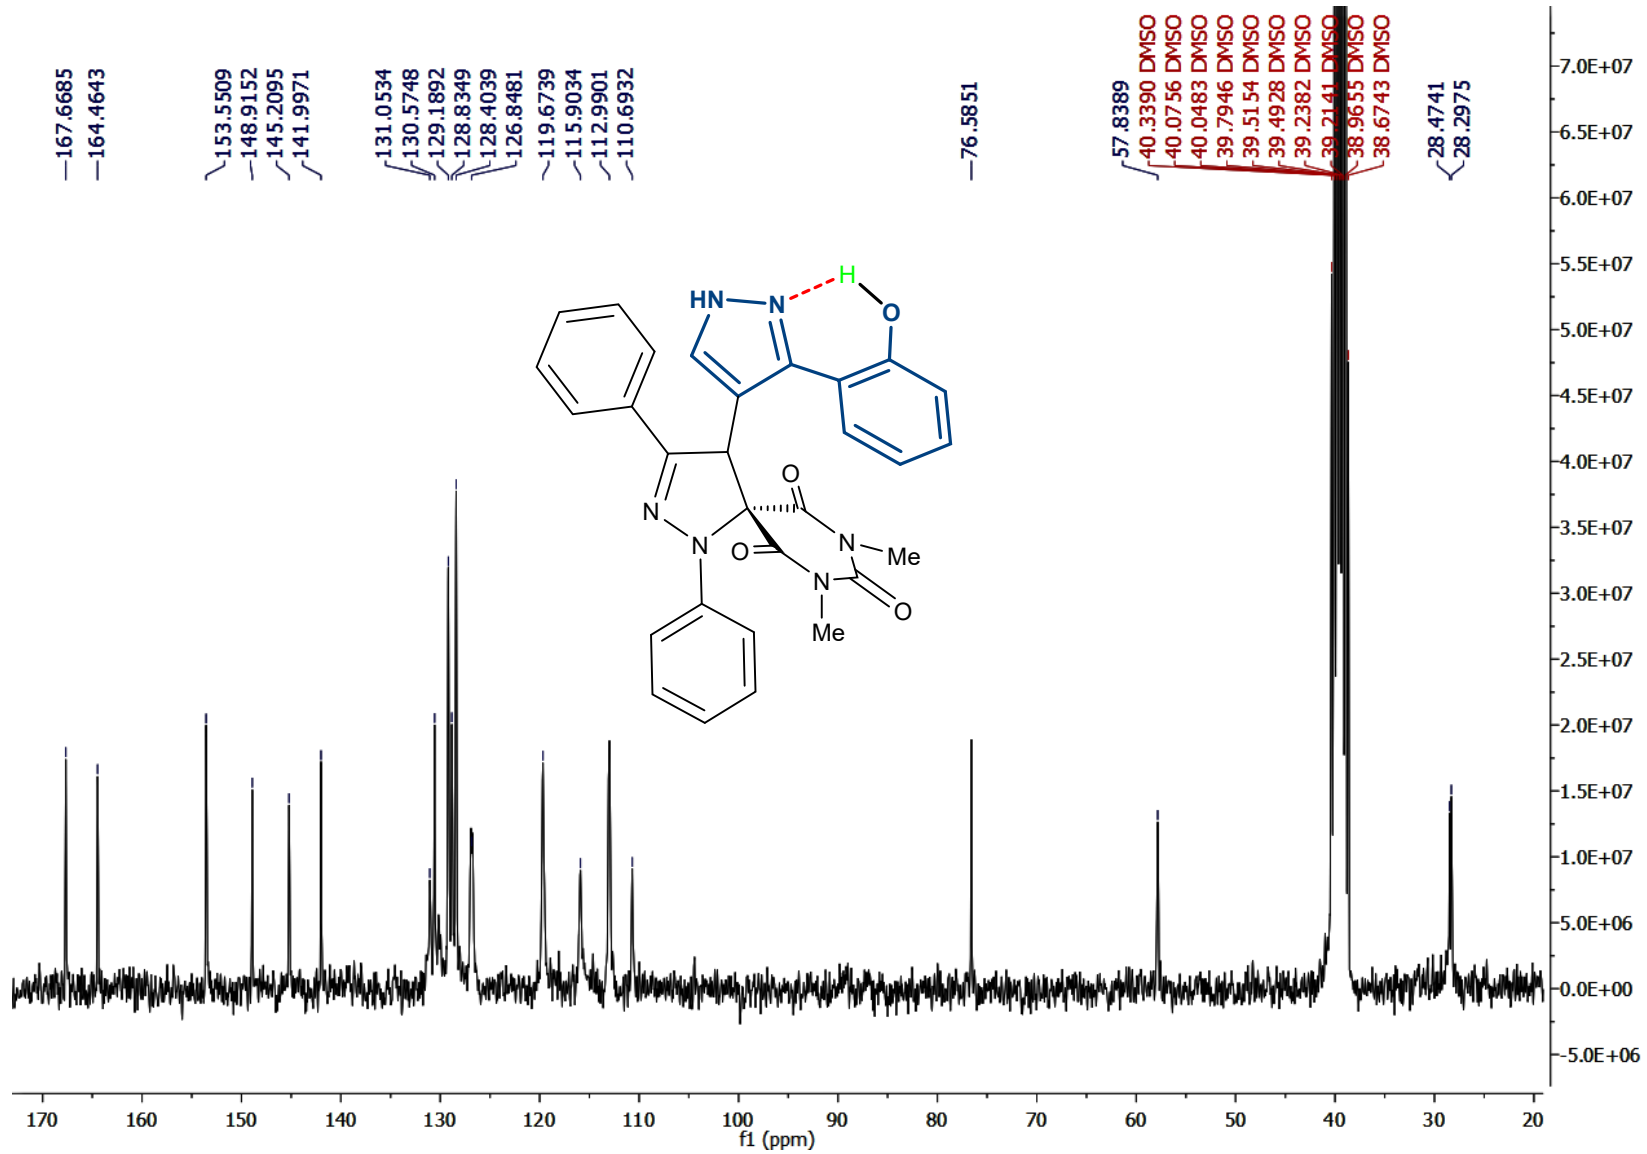

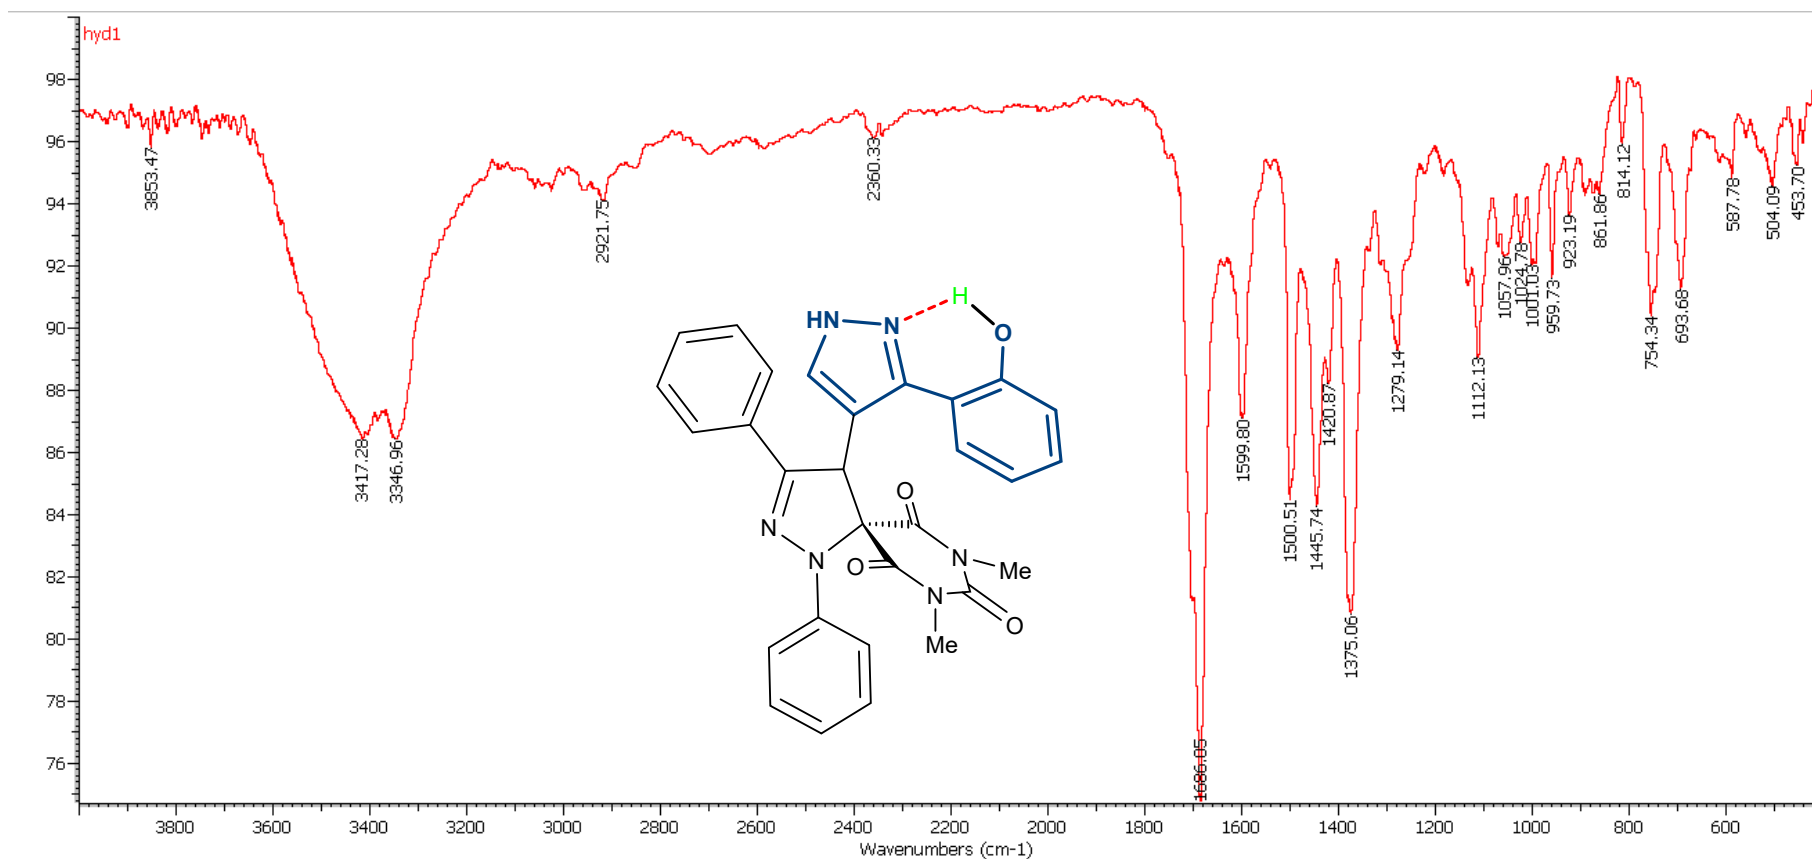

IR of 4a

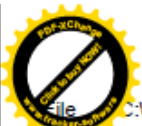

File: C:\MSDCHEM\3\DATA\Snapshot\HYD-1.d

Operator :

Acquired : 27 Jan 2021 10:37 using AcqMethod default.m

Instrument : DIRECT PROBE

Sample Name:

Misc Info :

Vial Number: 1

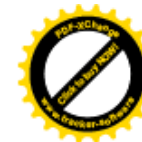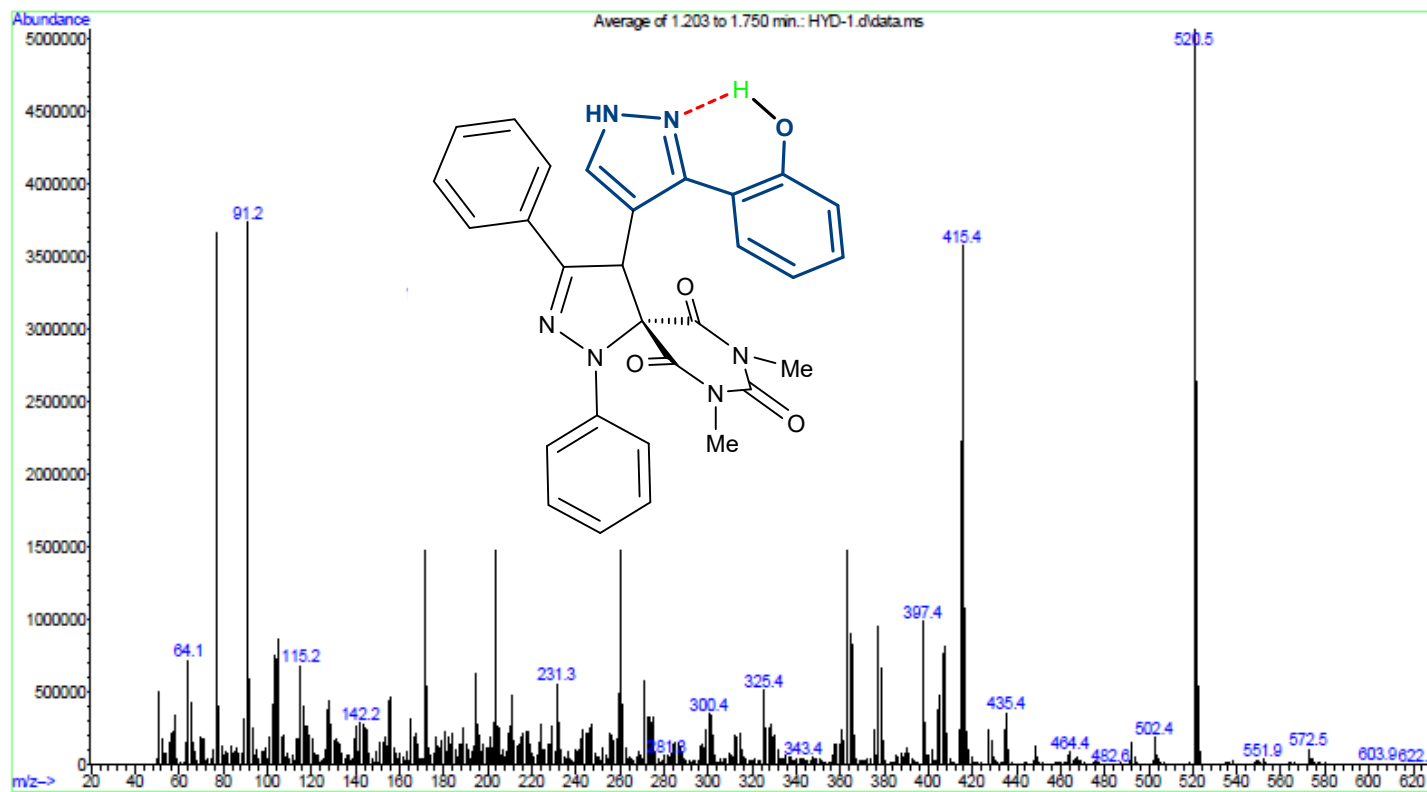

Mass of 4a

S51

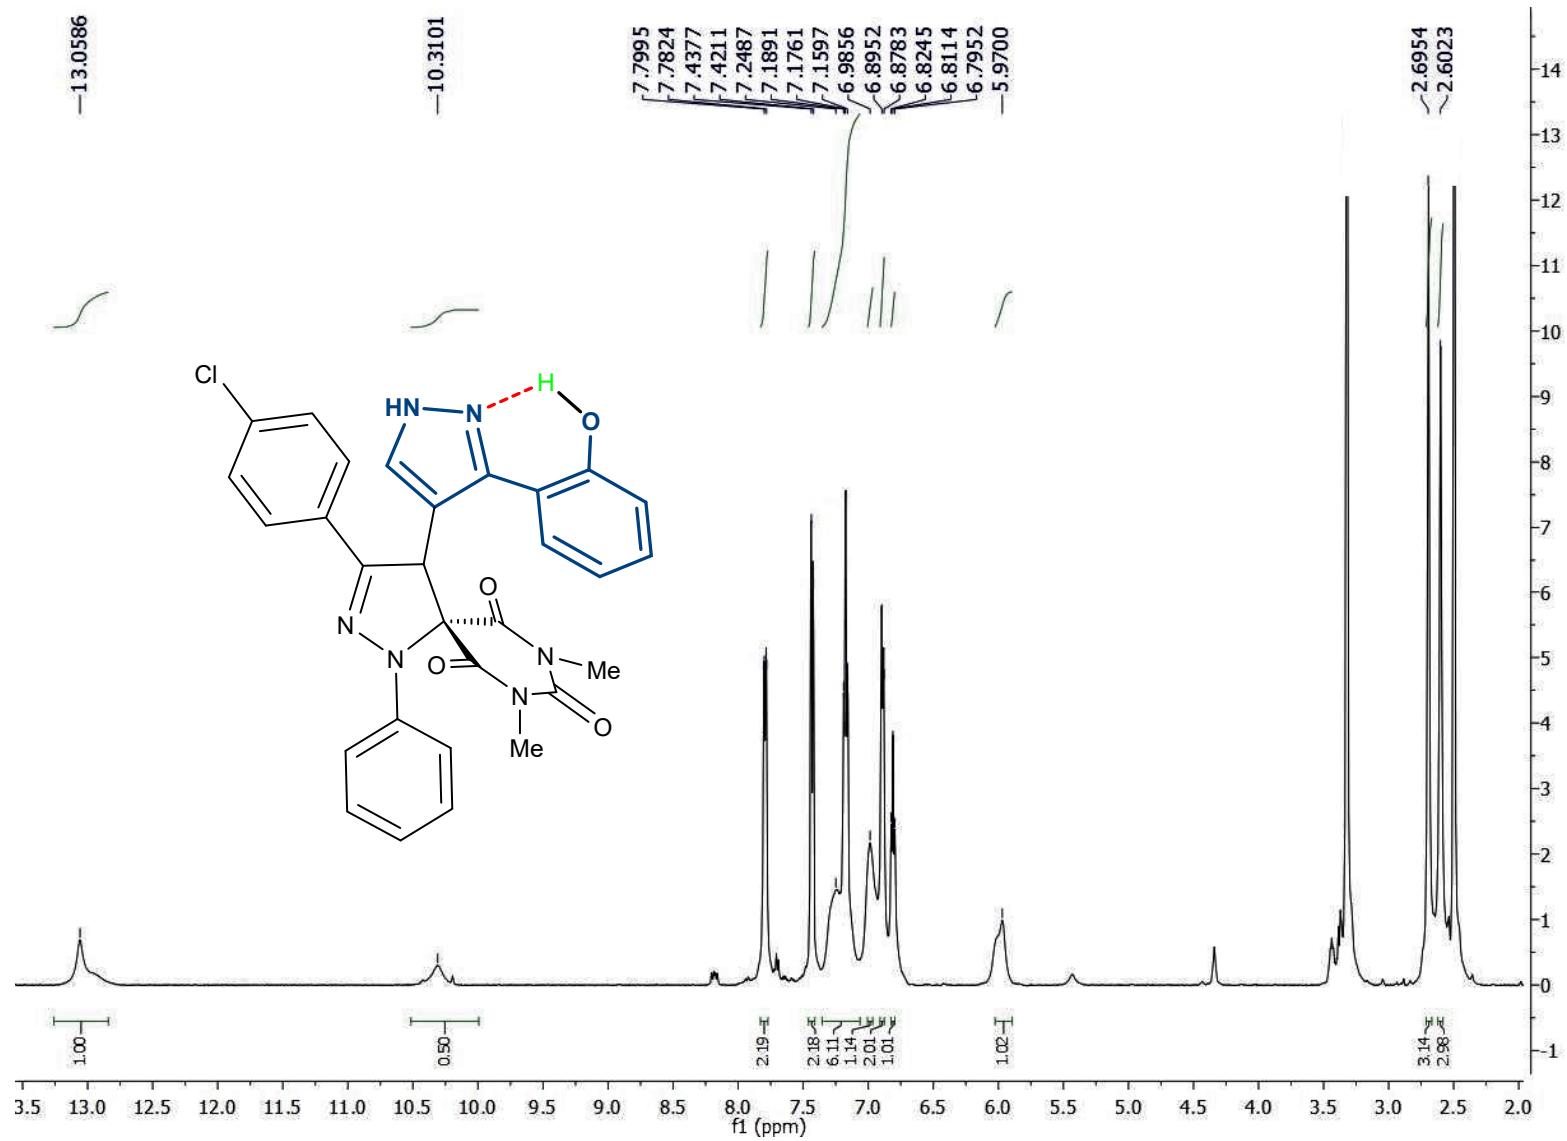

<sup>1</sup>H NMR (DMSO, 300 MHz) spectrum of **4b**

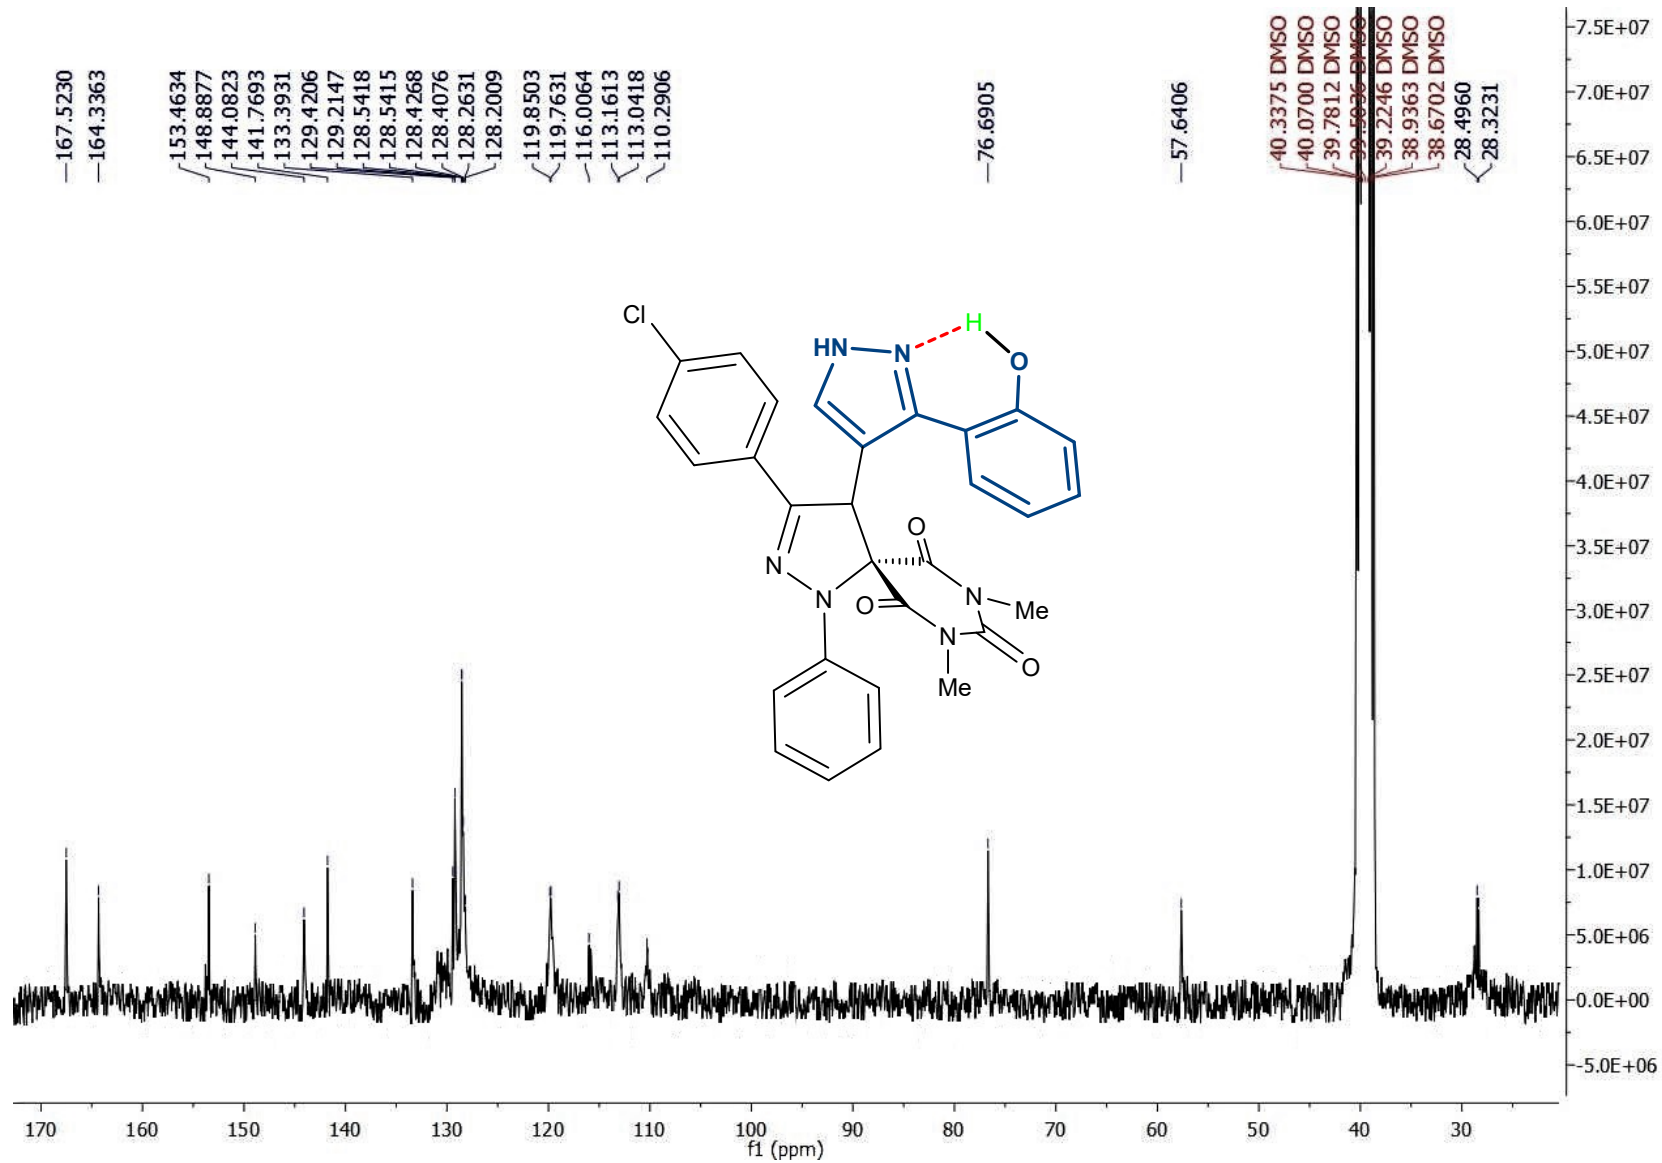

$^{13}\text{C}\{^1\text{H}\}$  NMR (DMSO, 75 MHz) spectrum of **4b**

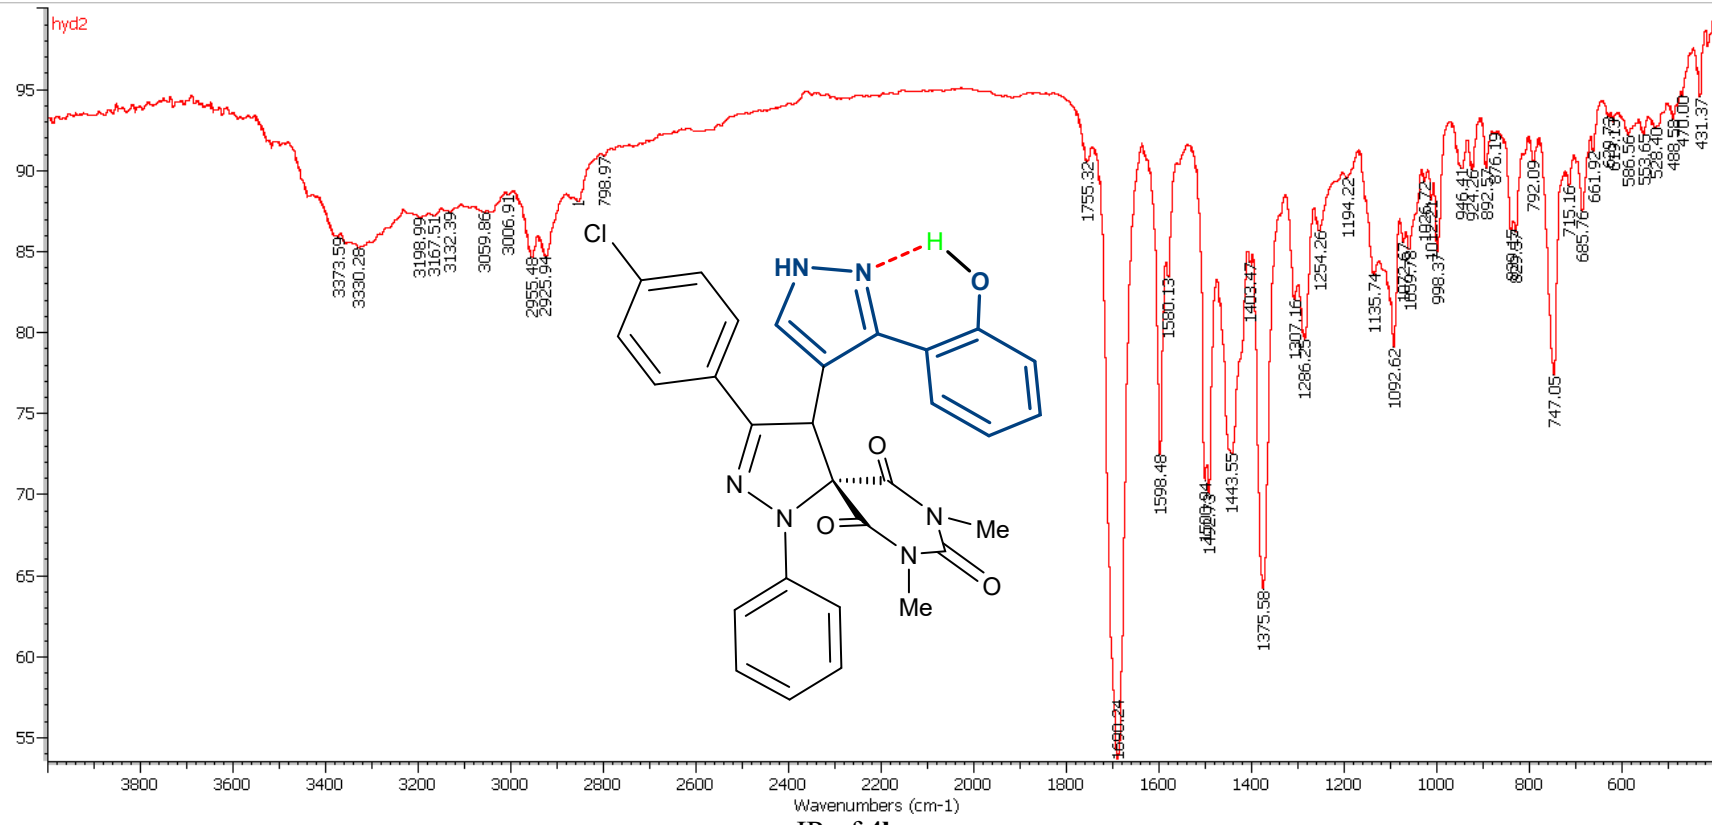

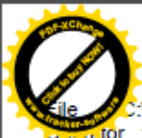

File : C:\MSDCHEM3\DATA\Snapshot\HYD2.d

Operator :

Acquired : 13 Oct 2021 11:48 using AcqMethod default.m

Instrument : DIRECT PROBE

Sample Name:

Misc Info :

Vial Number: 1

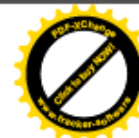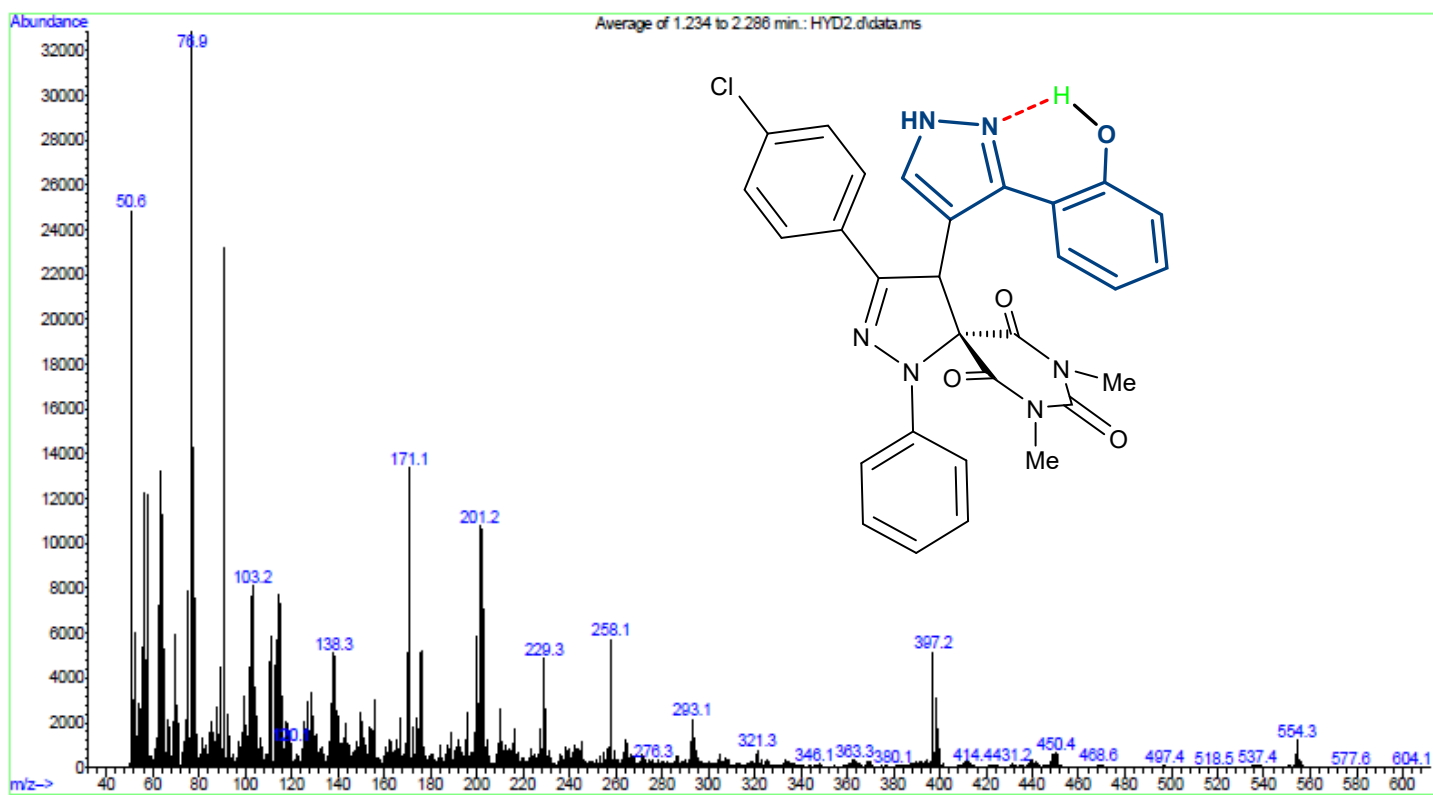

Mass of **4b**

S55

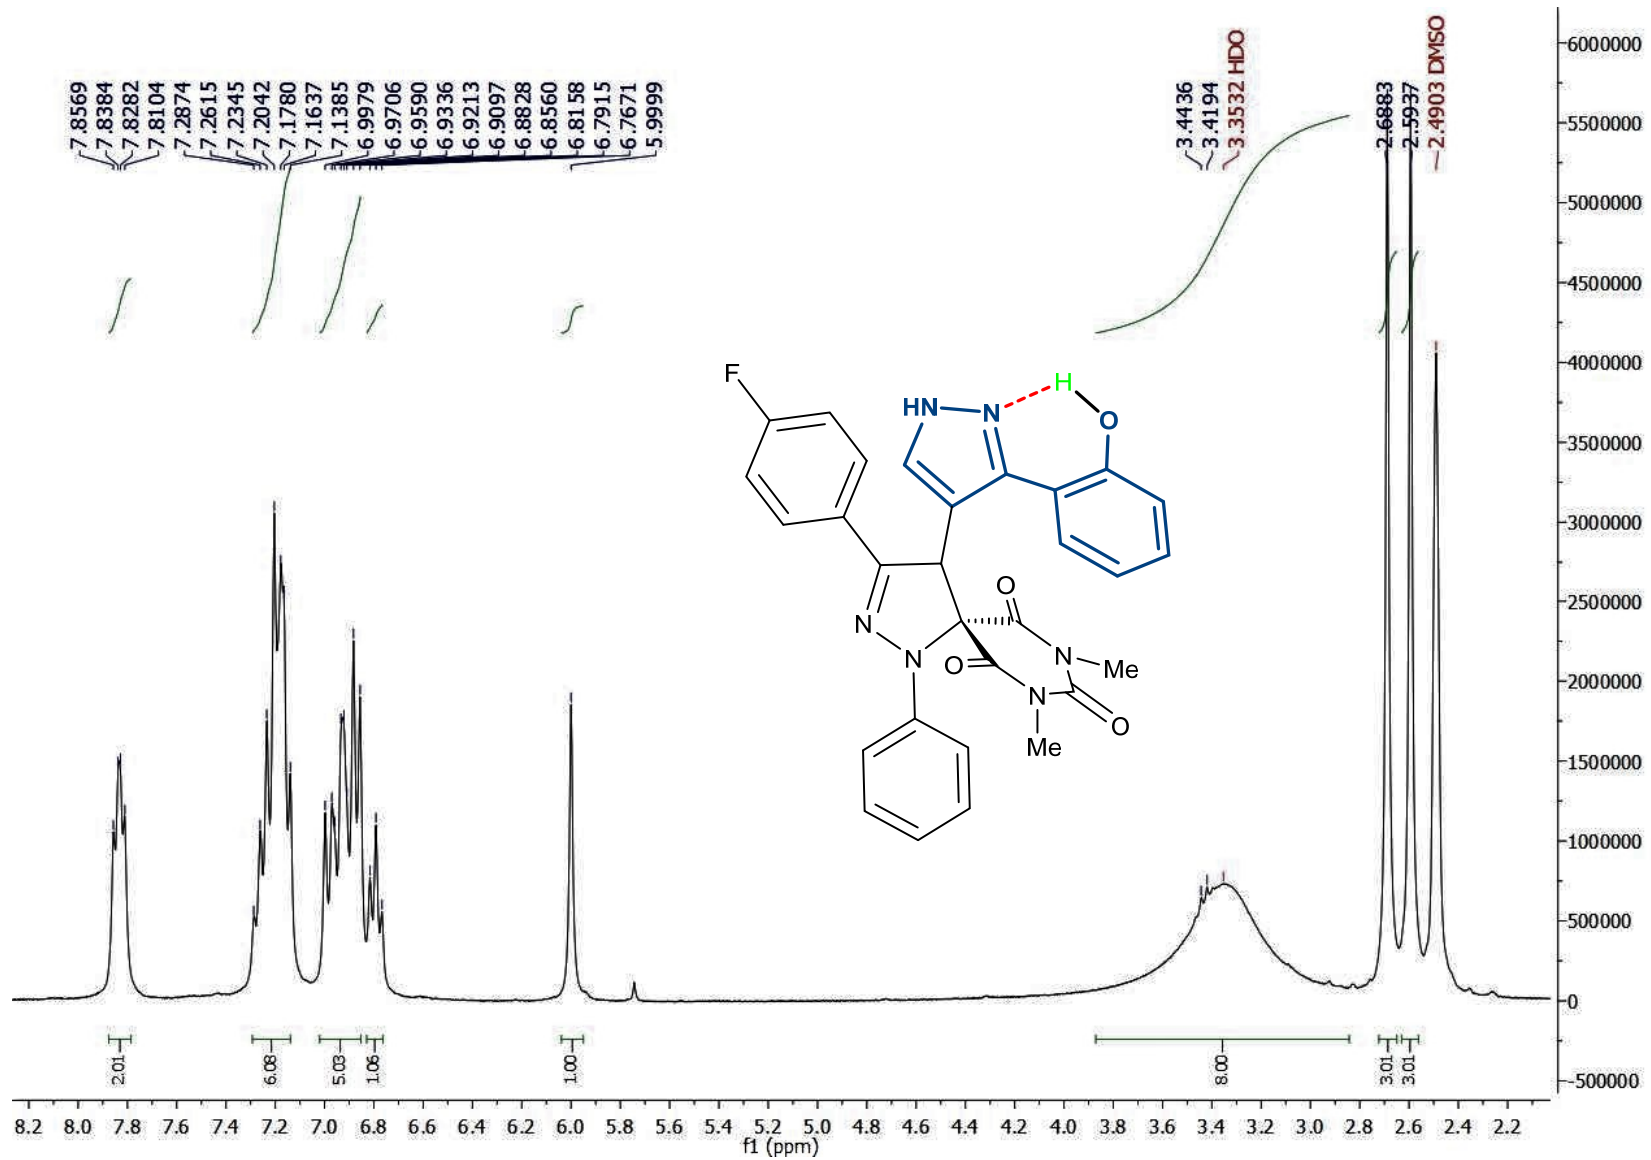

<sup>1</sup>H NMR (DMSO, 300 MHz) spectrum of 4c



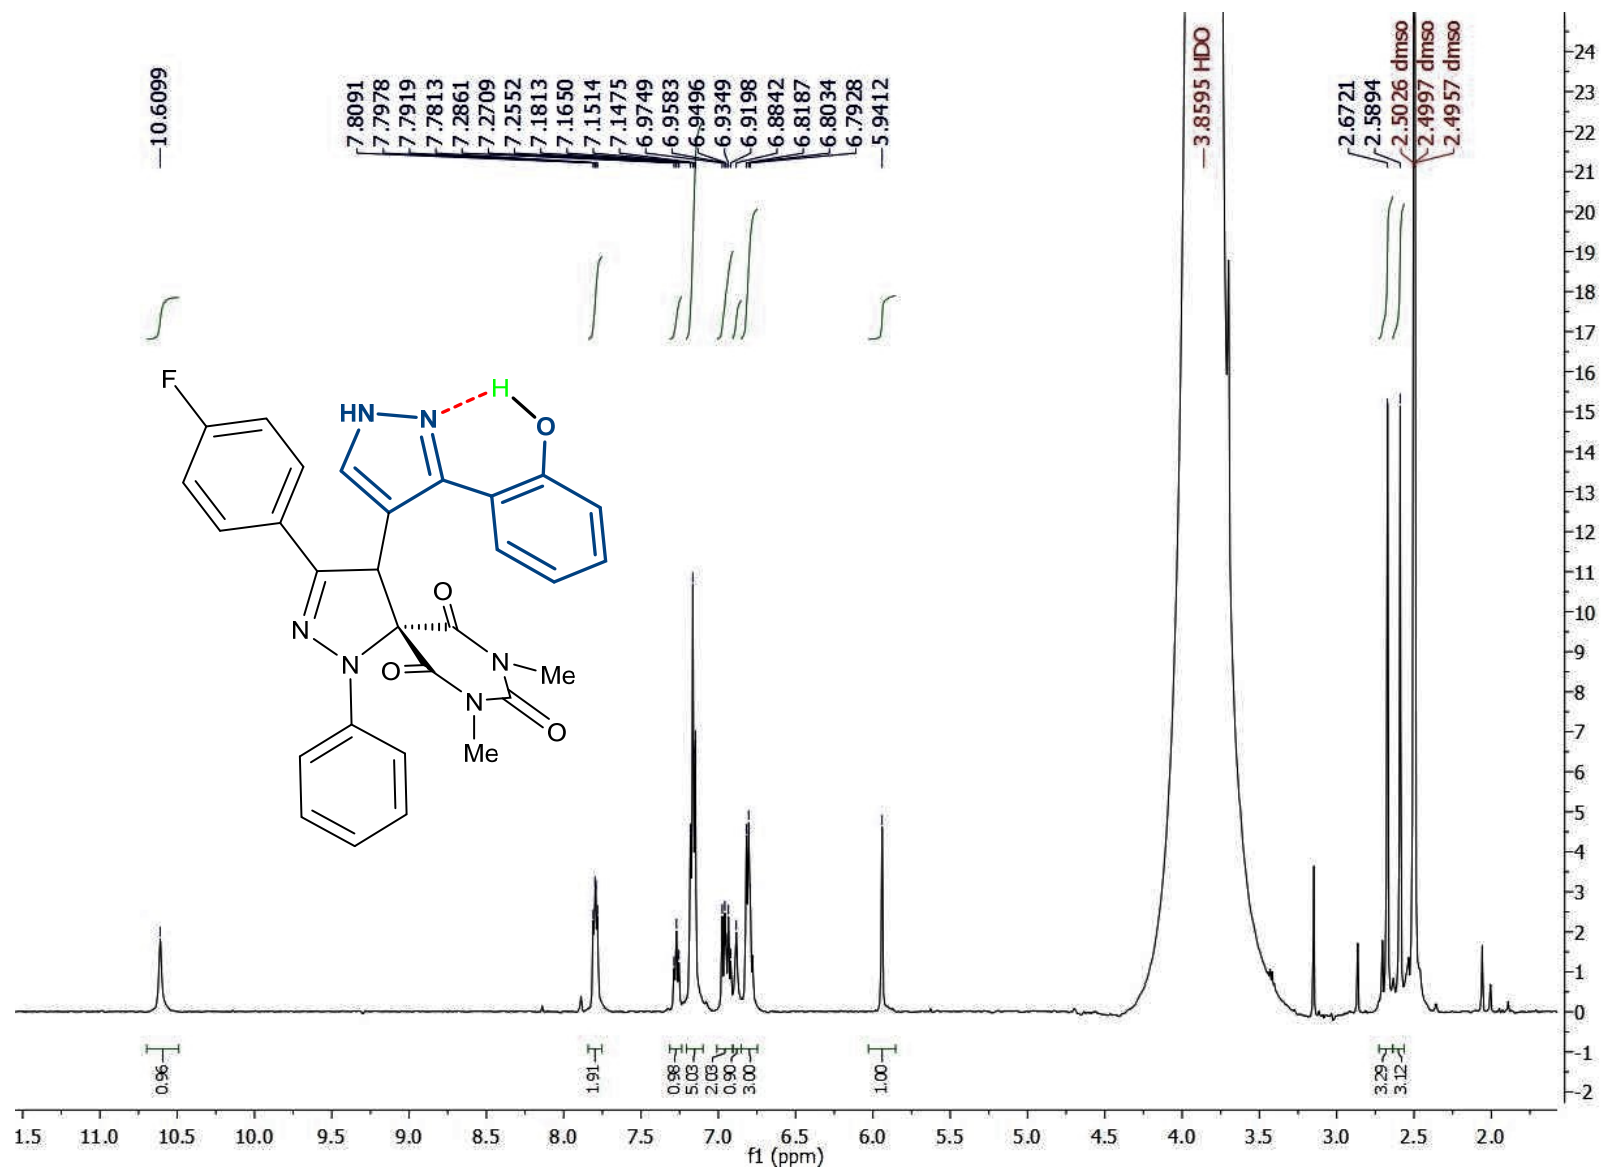

<sup>1</sup>H NMR (DMSO, 300 MHz) spectrum of 4c

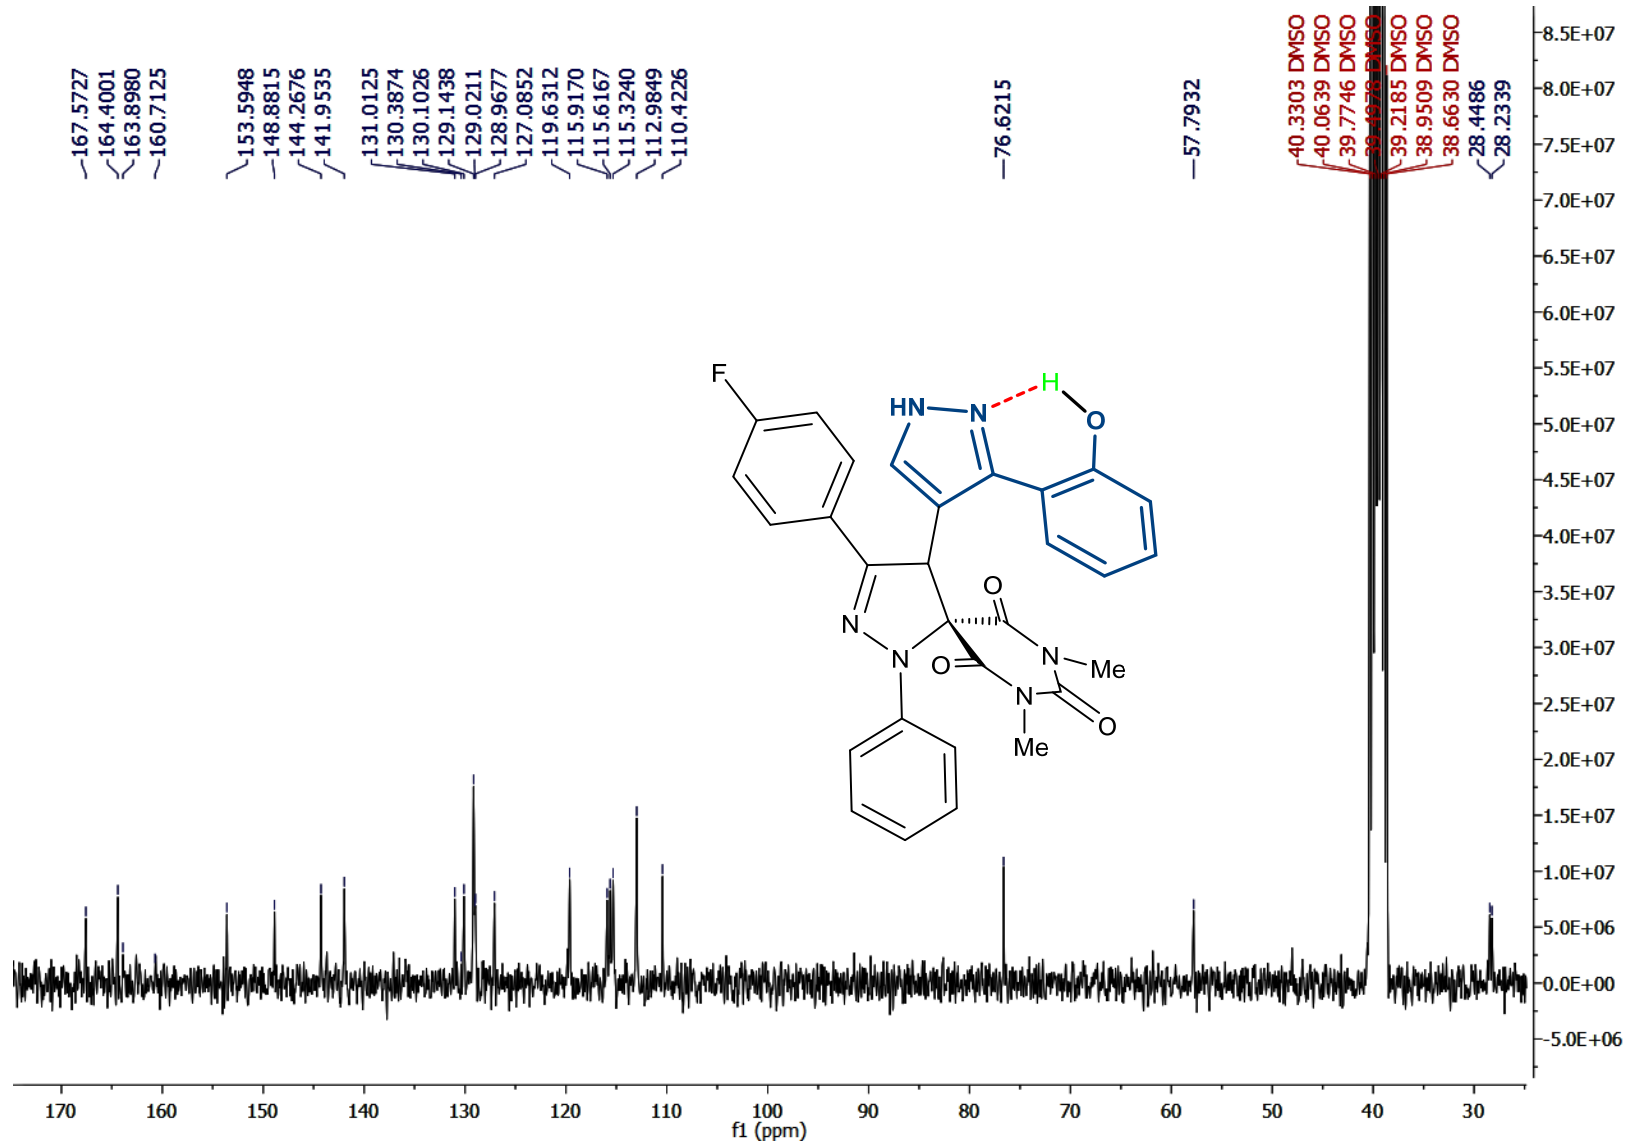

$^{13}\text{C}\{^1\text{H}\}$  NMR (DMSO, 75 MHz) spectrum of 4c

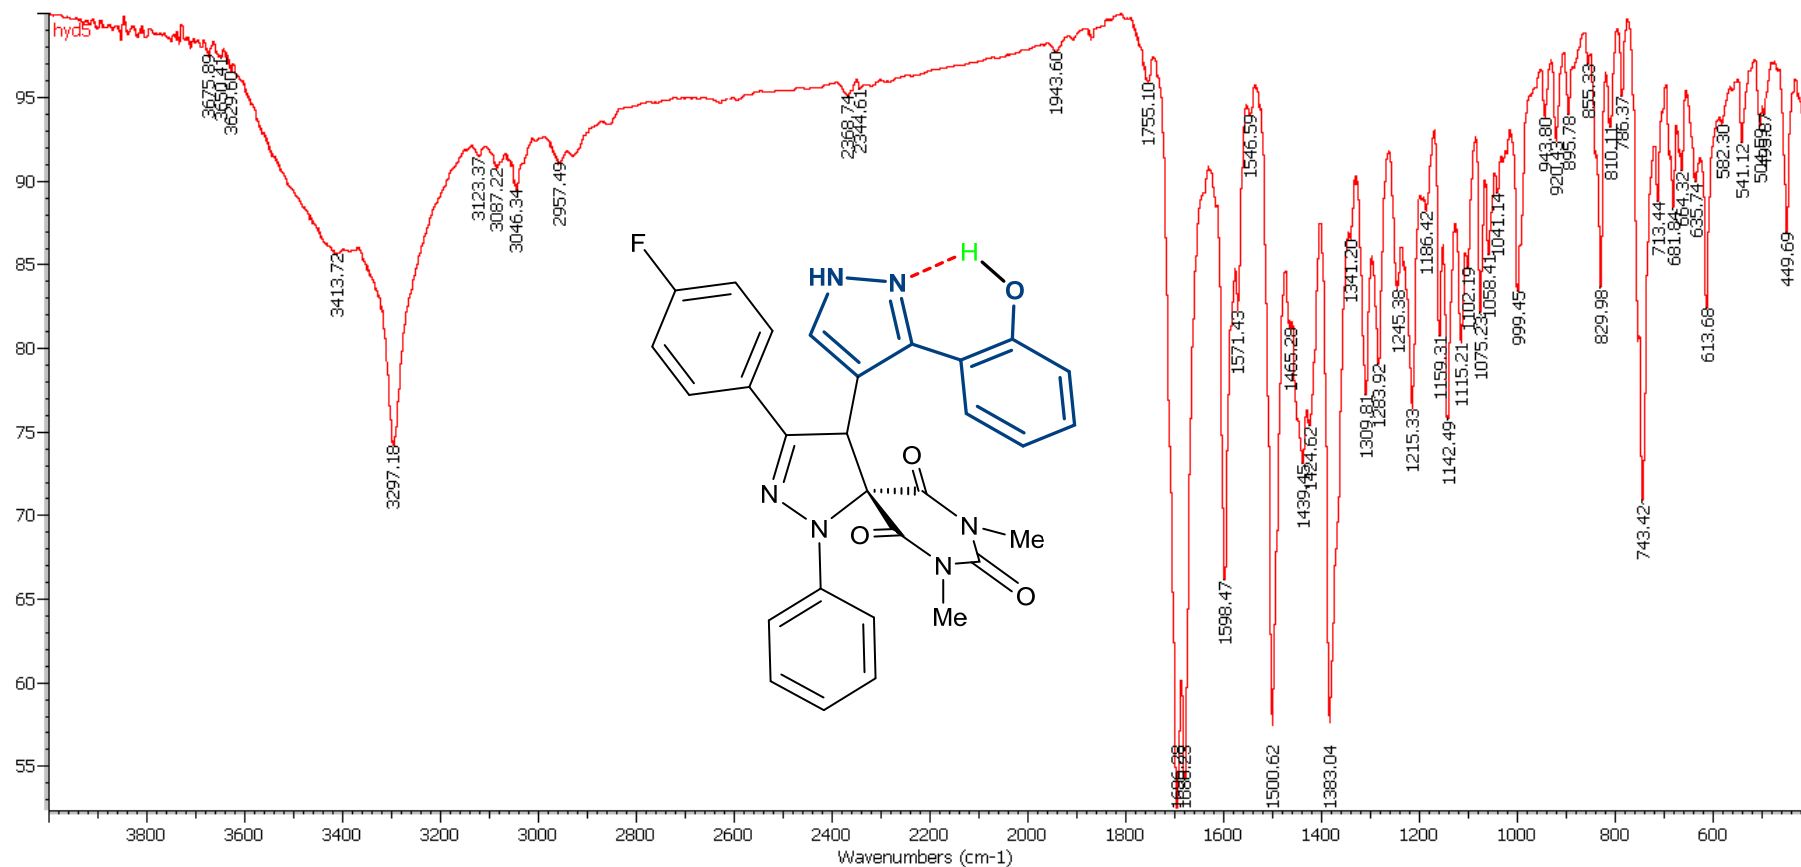

IR of 4c

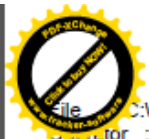

File: C:\MSDCHEM\3\DATA\Snapshot\HYD-5.d  
Operator :  
Acquired : 27 Jan 2021 10:41 using AcqMethod default.m  
Instrument : DIRECT PROBE  
Sample Name:  
Misc Info :  
Vial Number: 1

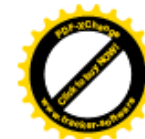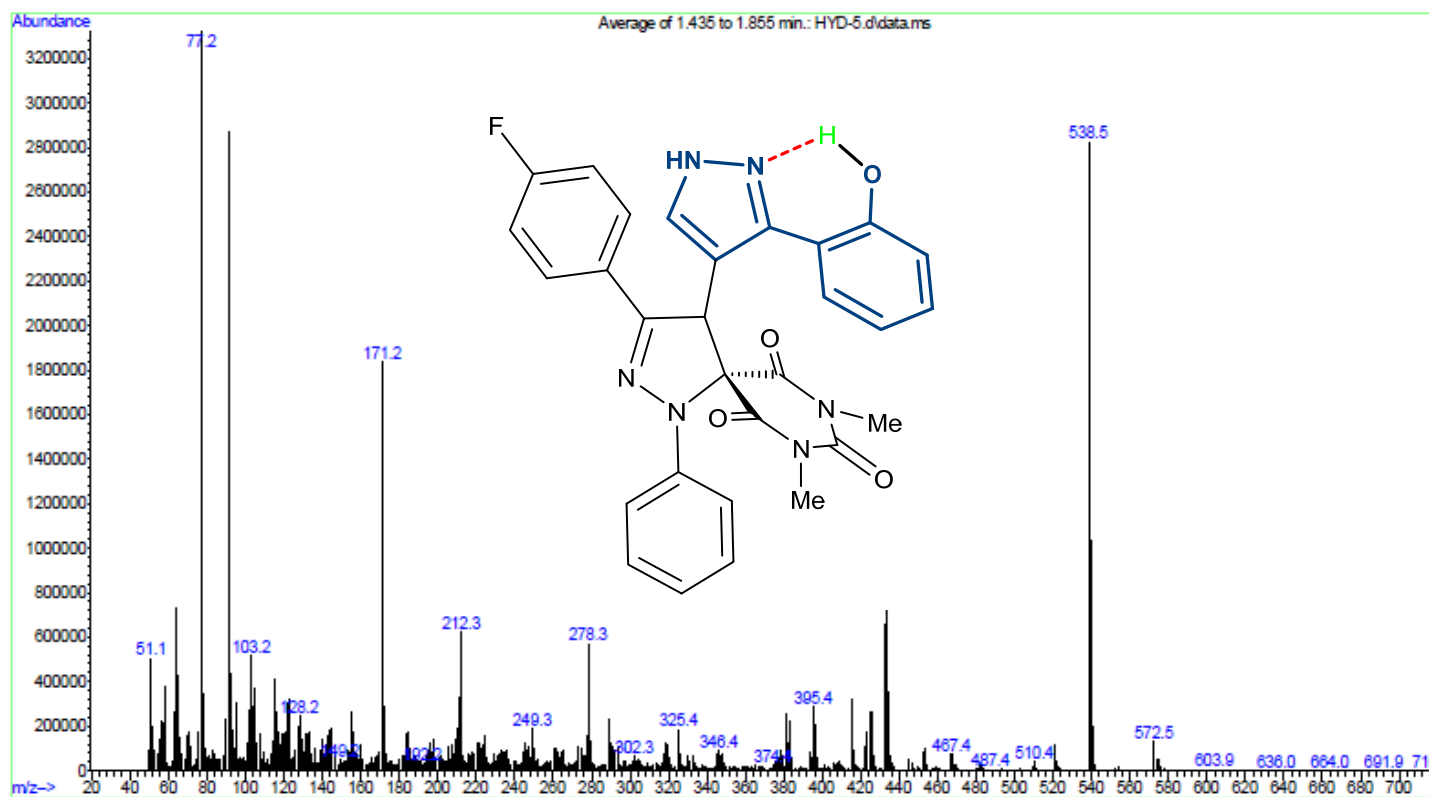

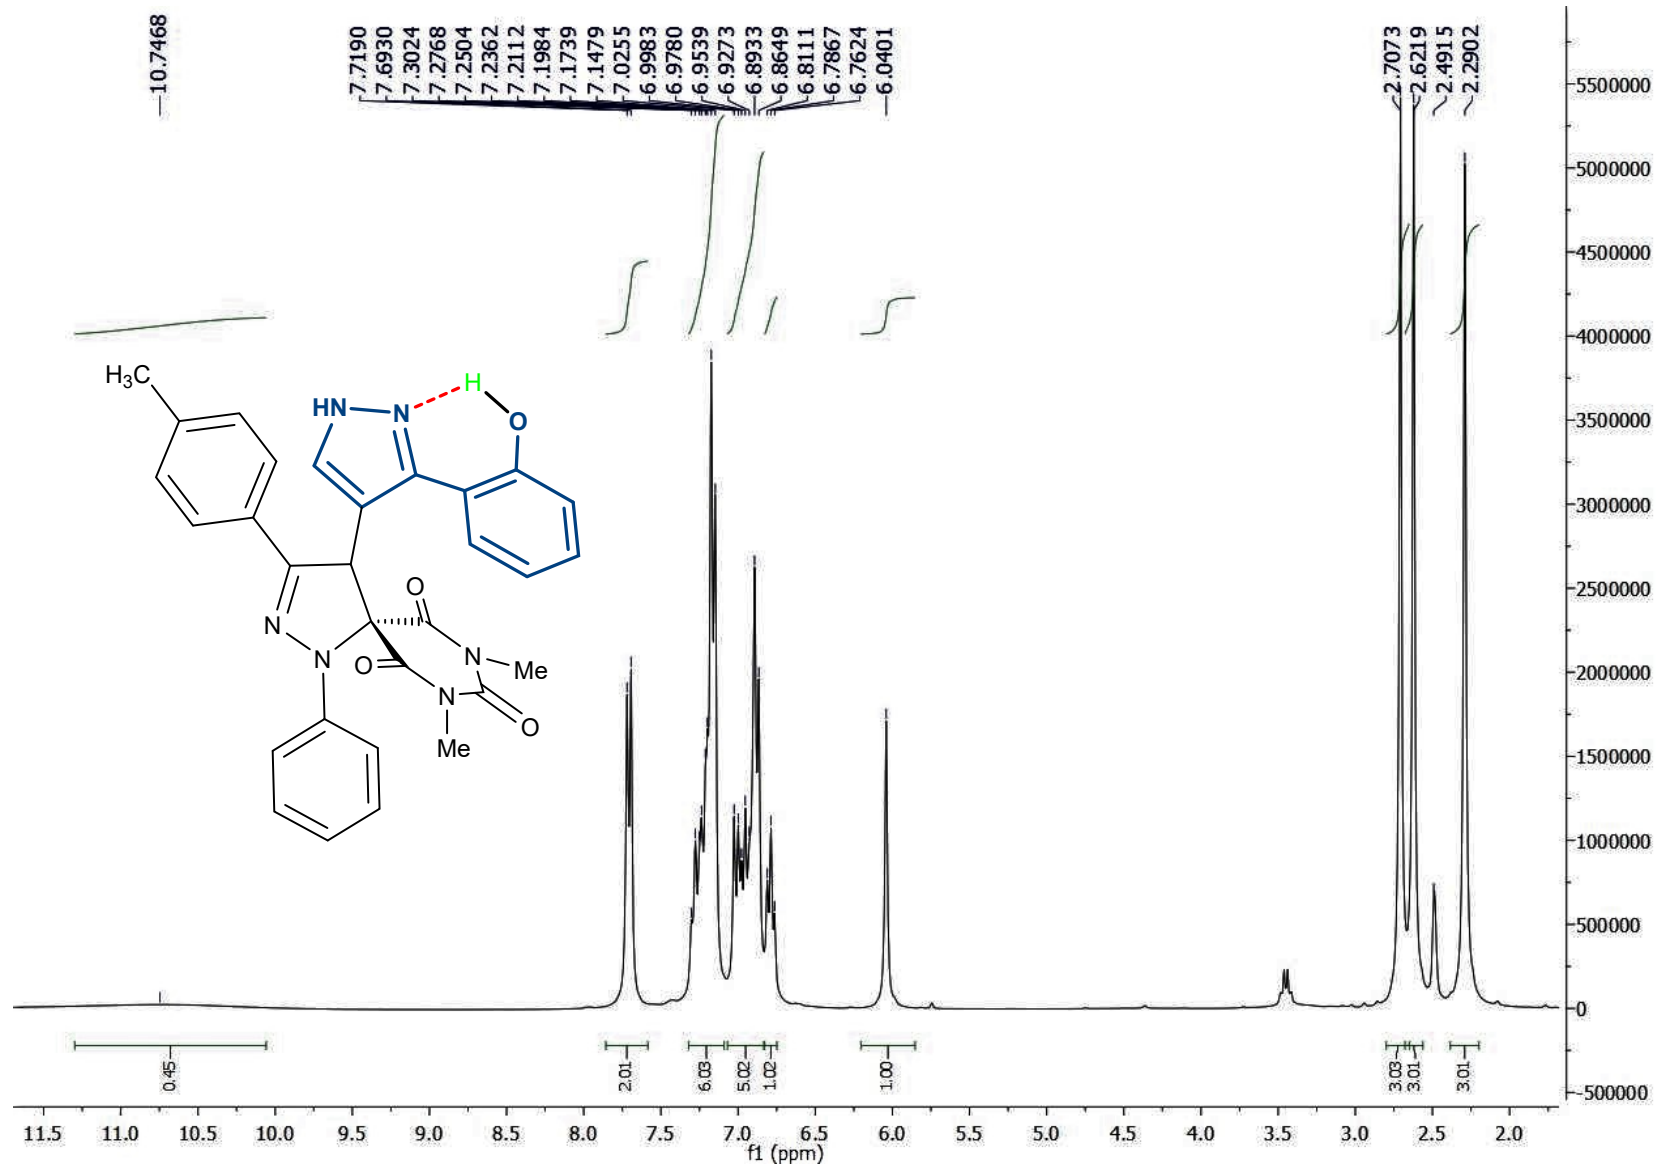

$^1\text{H}$  NMR (DMSO, 300 MHz) spectrum of **4d**

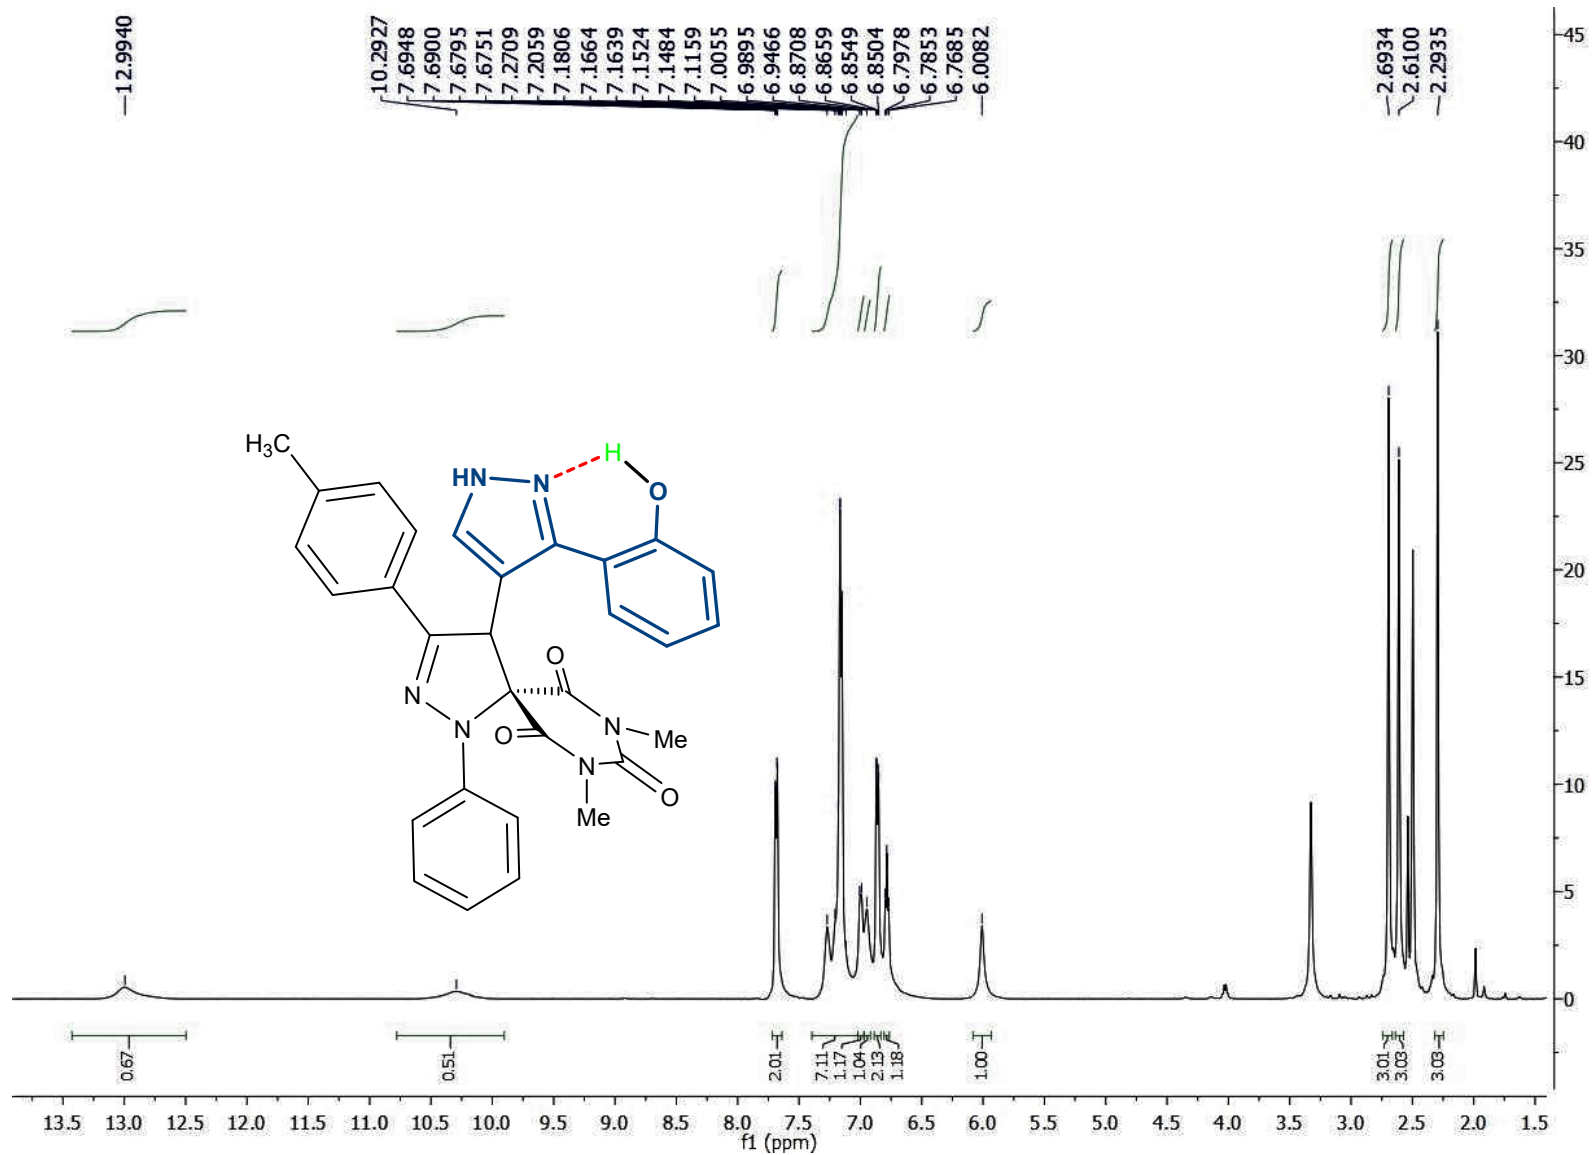

<sup>1</sup>H NMR (DMSO, 300 MHz) spectrum of **4d**

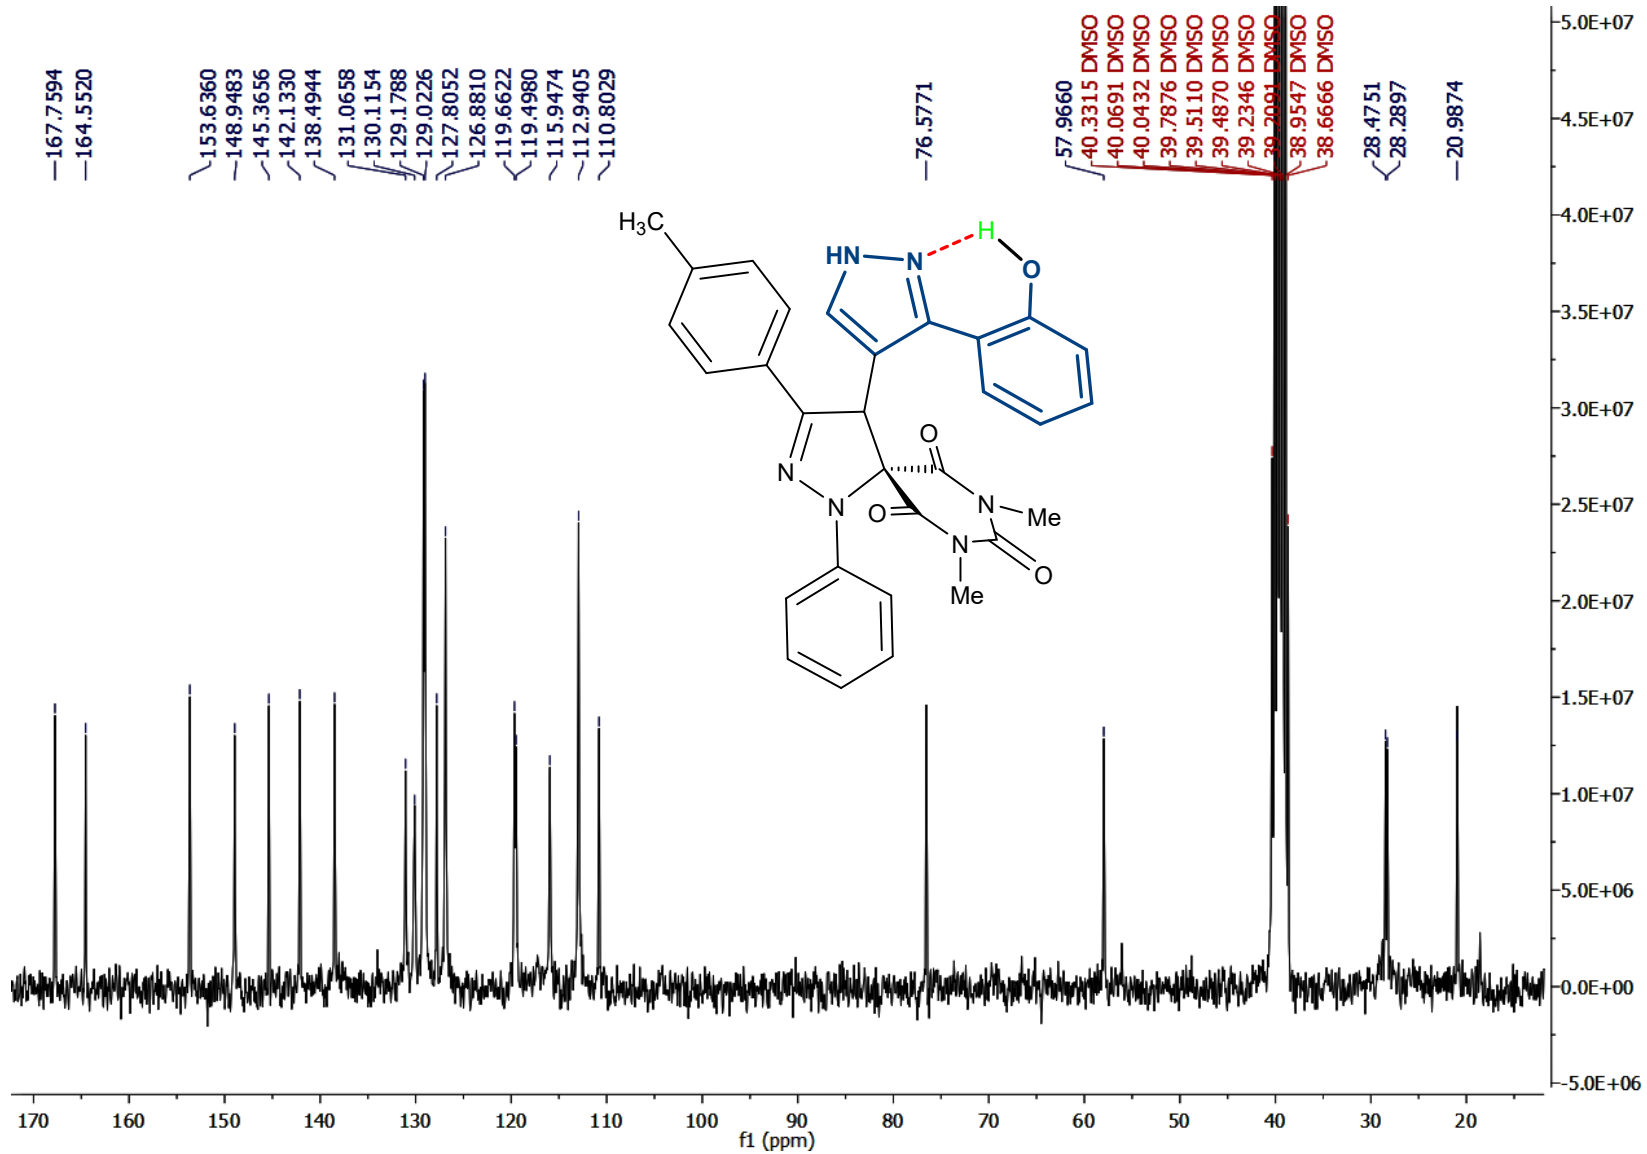

$^{13}\text{C}\{^1\text{H}\}$  NMR (DMSO, 75 MHz) spectrum of **4d**

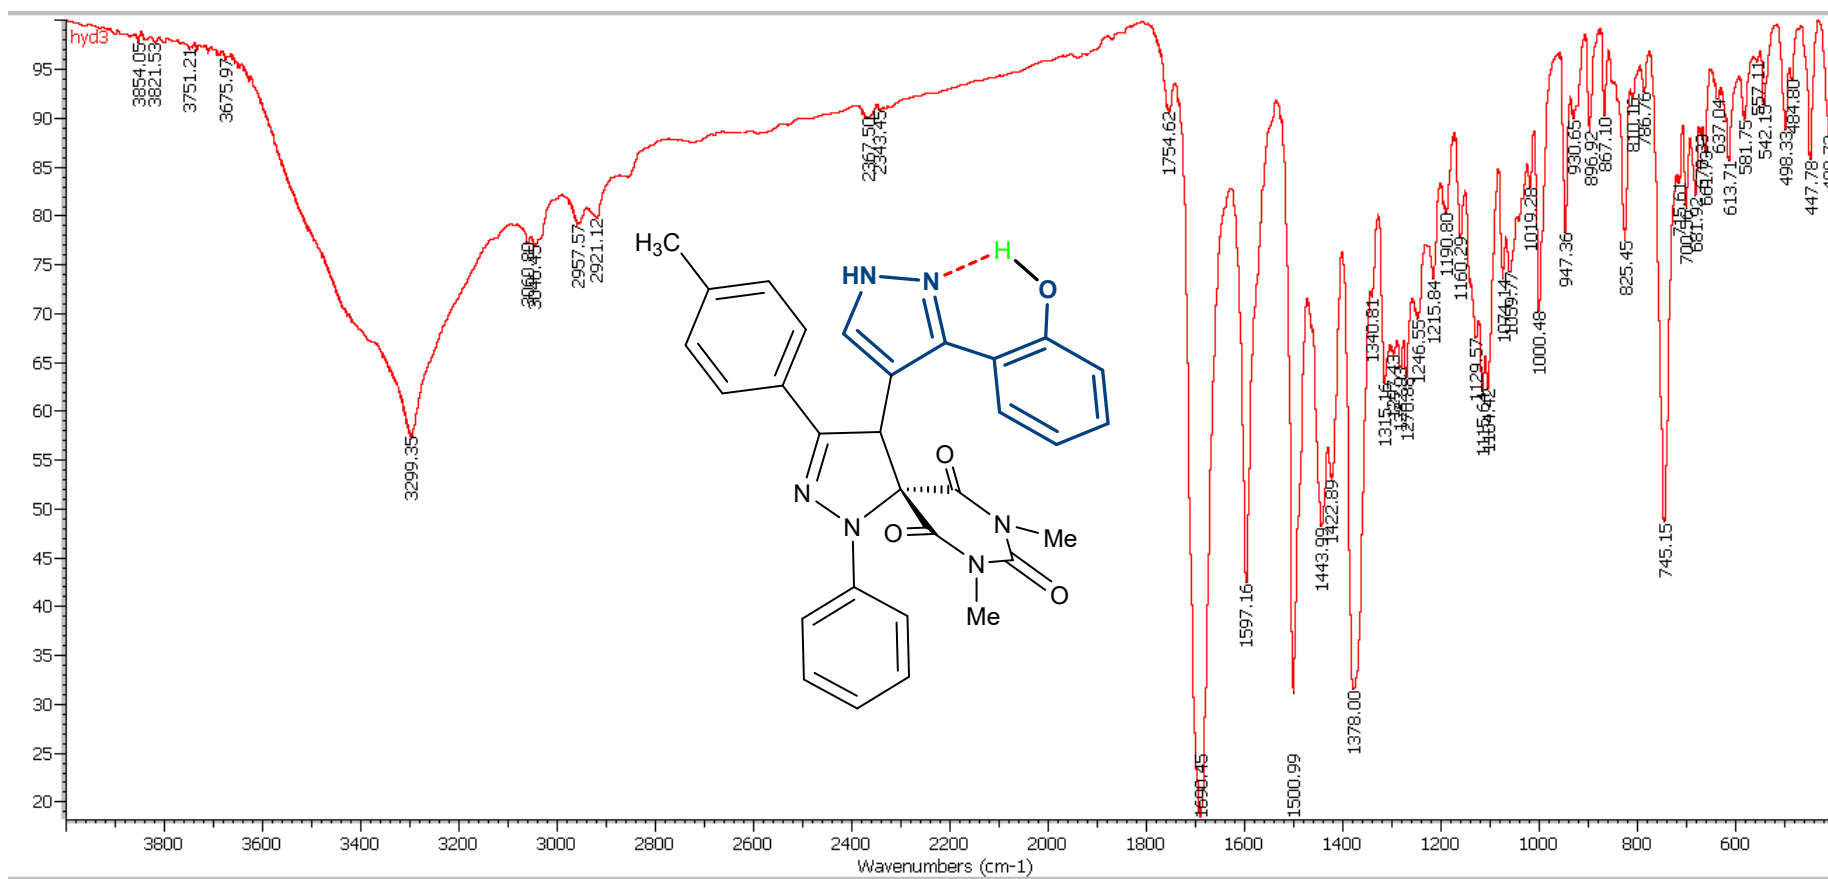

IR of 4d



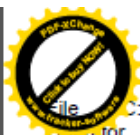

File : C:\MSDCHEM\3\DATA\Snapshot\HYD-3.d

Operator :

Acquired : 27 Jan 2021 10:46 using AcqMethod default.m

Instrument : DIRECT PROBE

Sample Name:

Misc Info :

Vial Number: 1

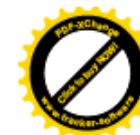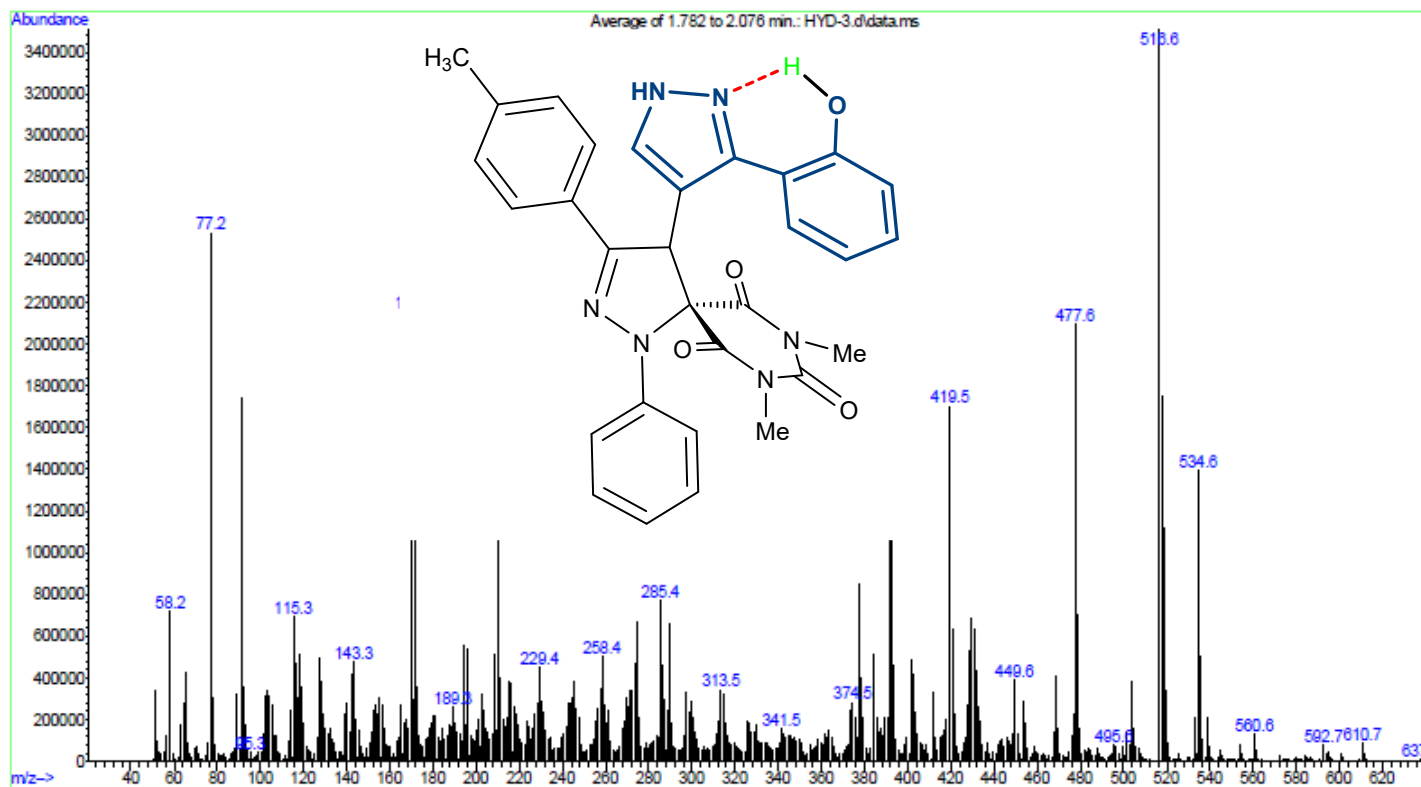

Mass of **4d**

S65

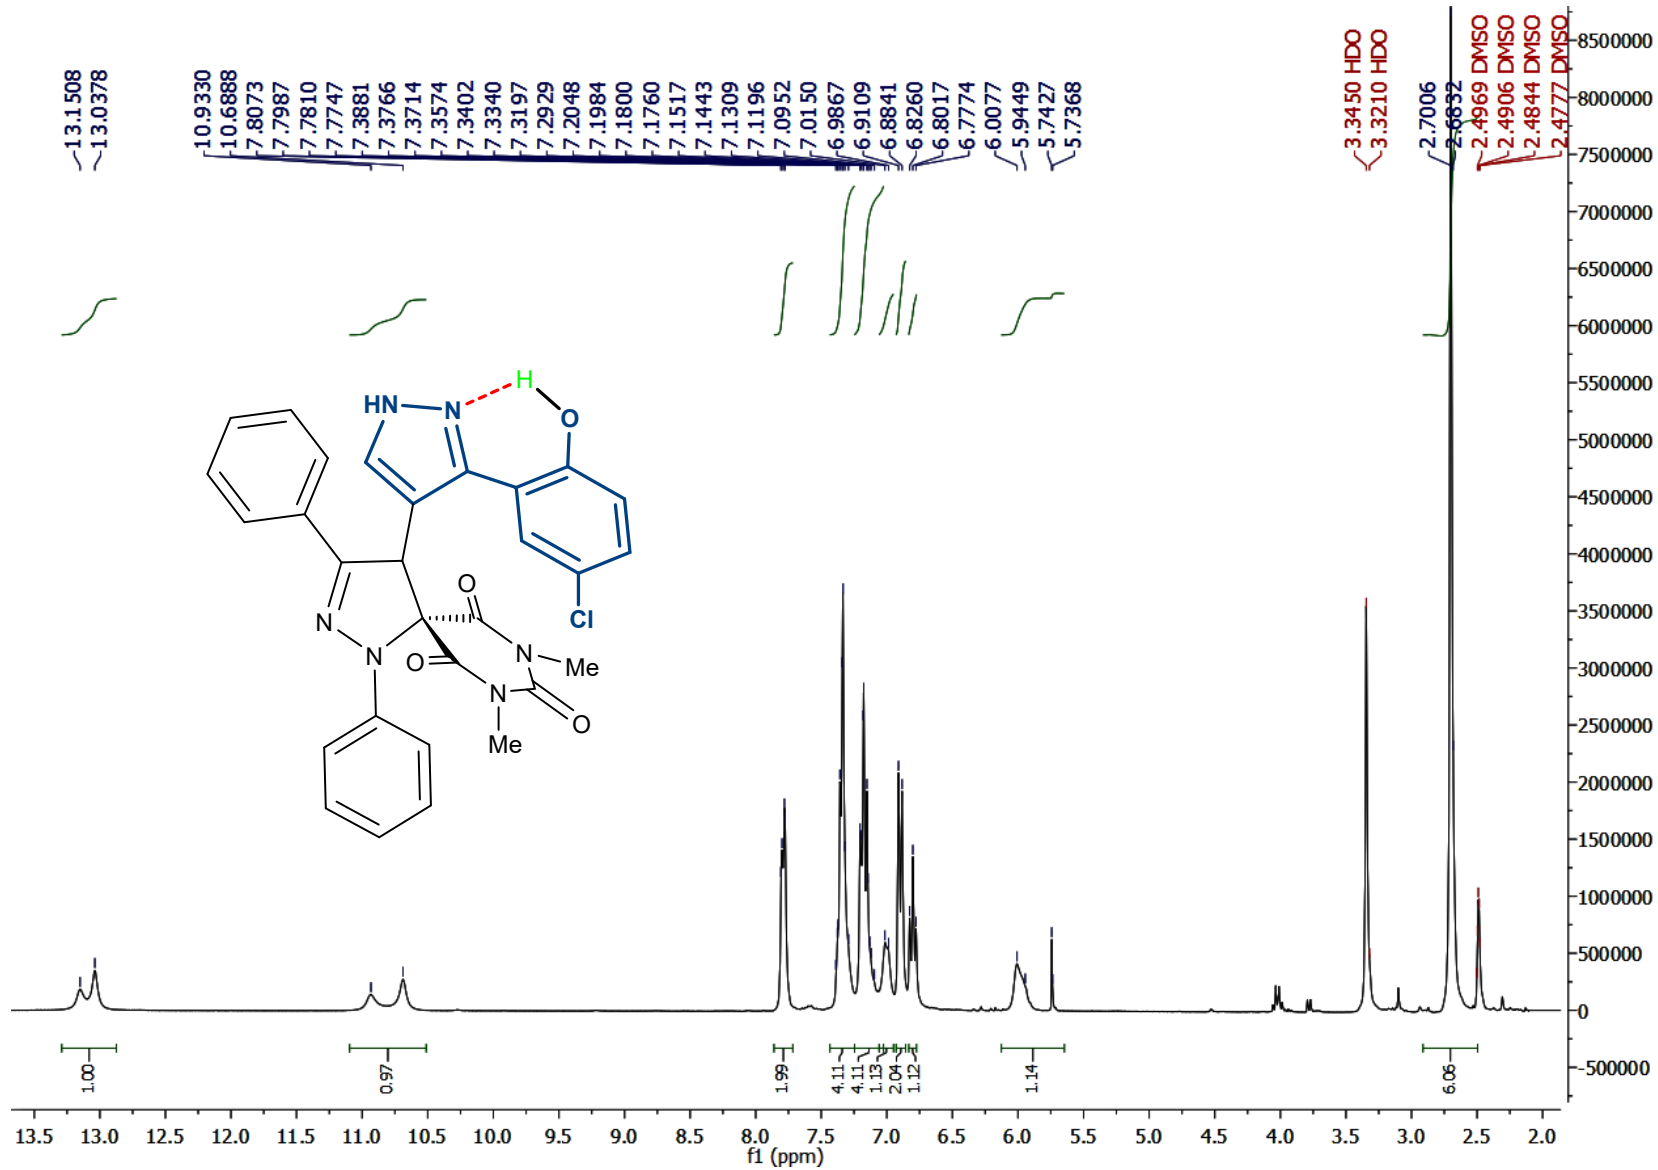

<sup>1</sup>H NMR (DMSO, 300 MHz) spectrum of 4e

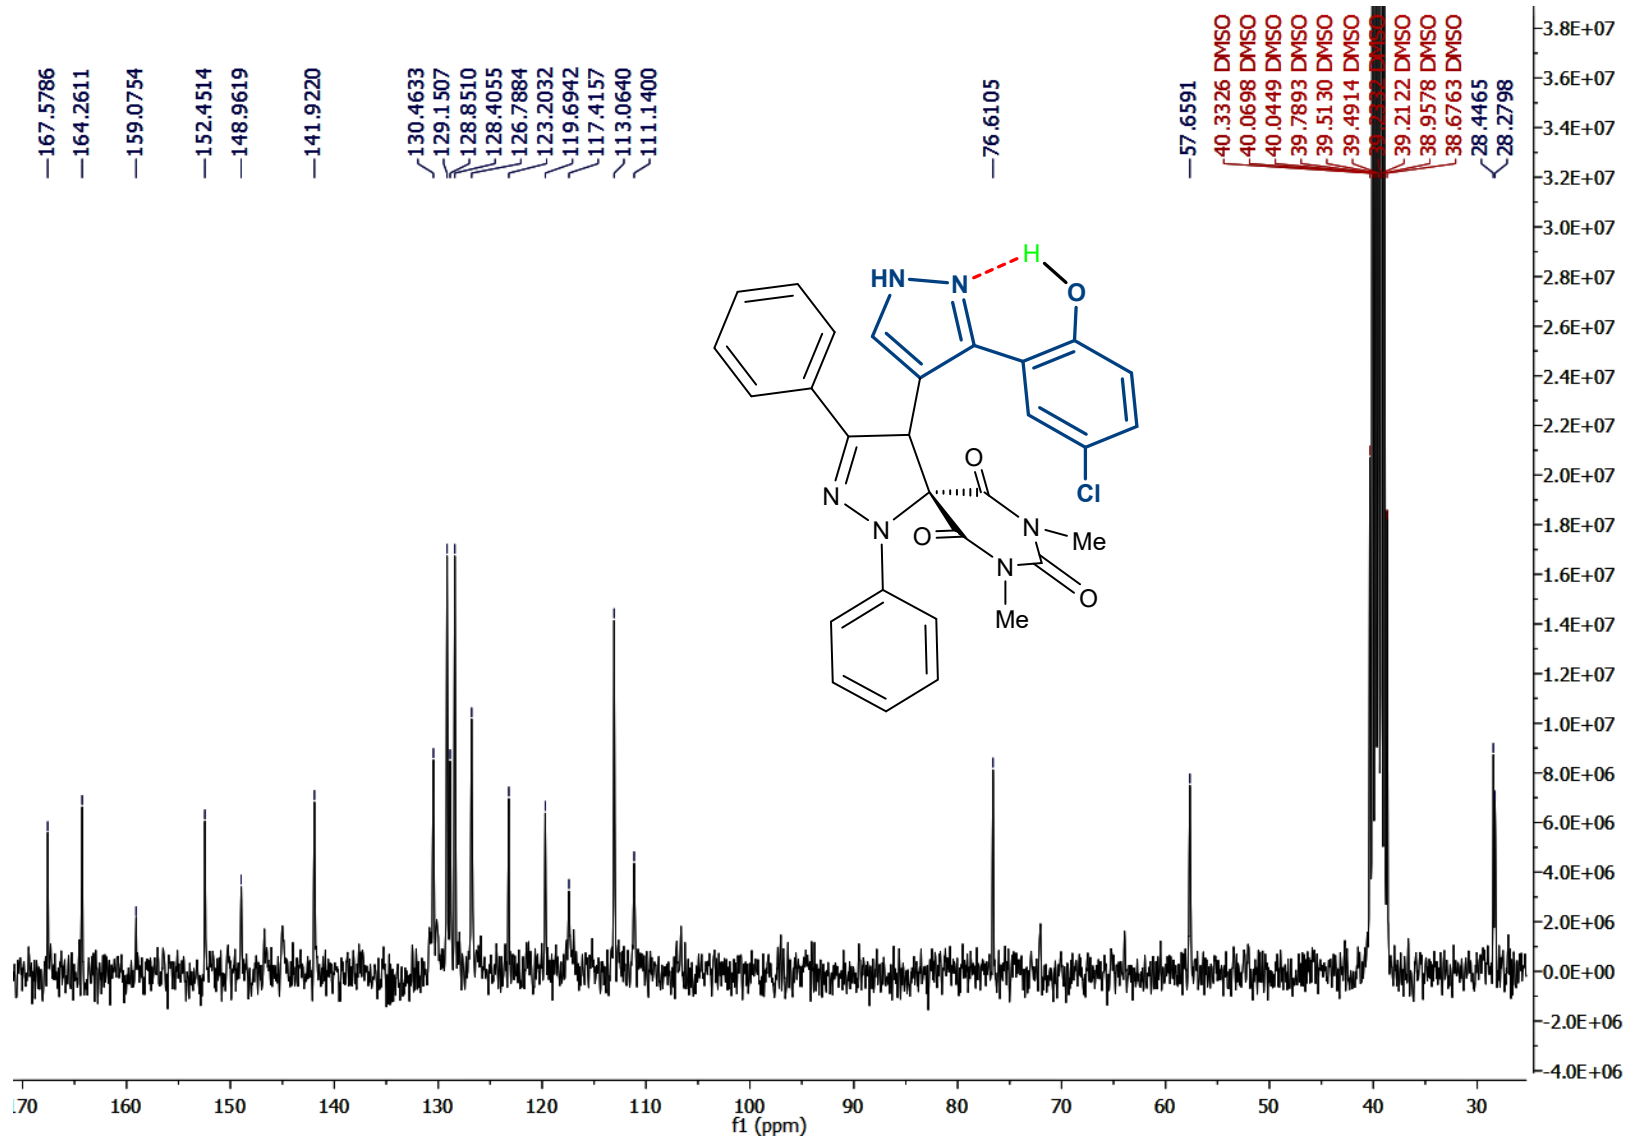

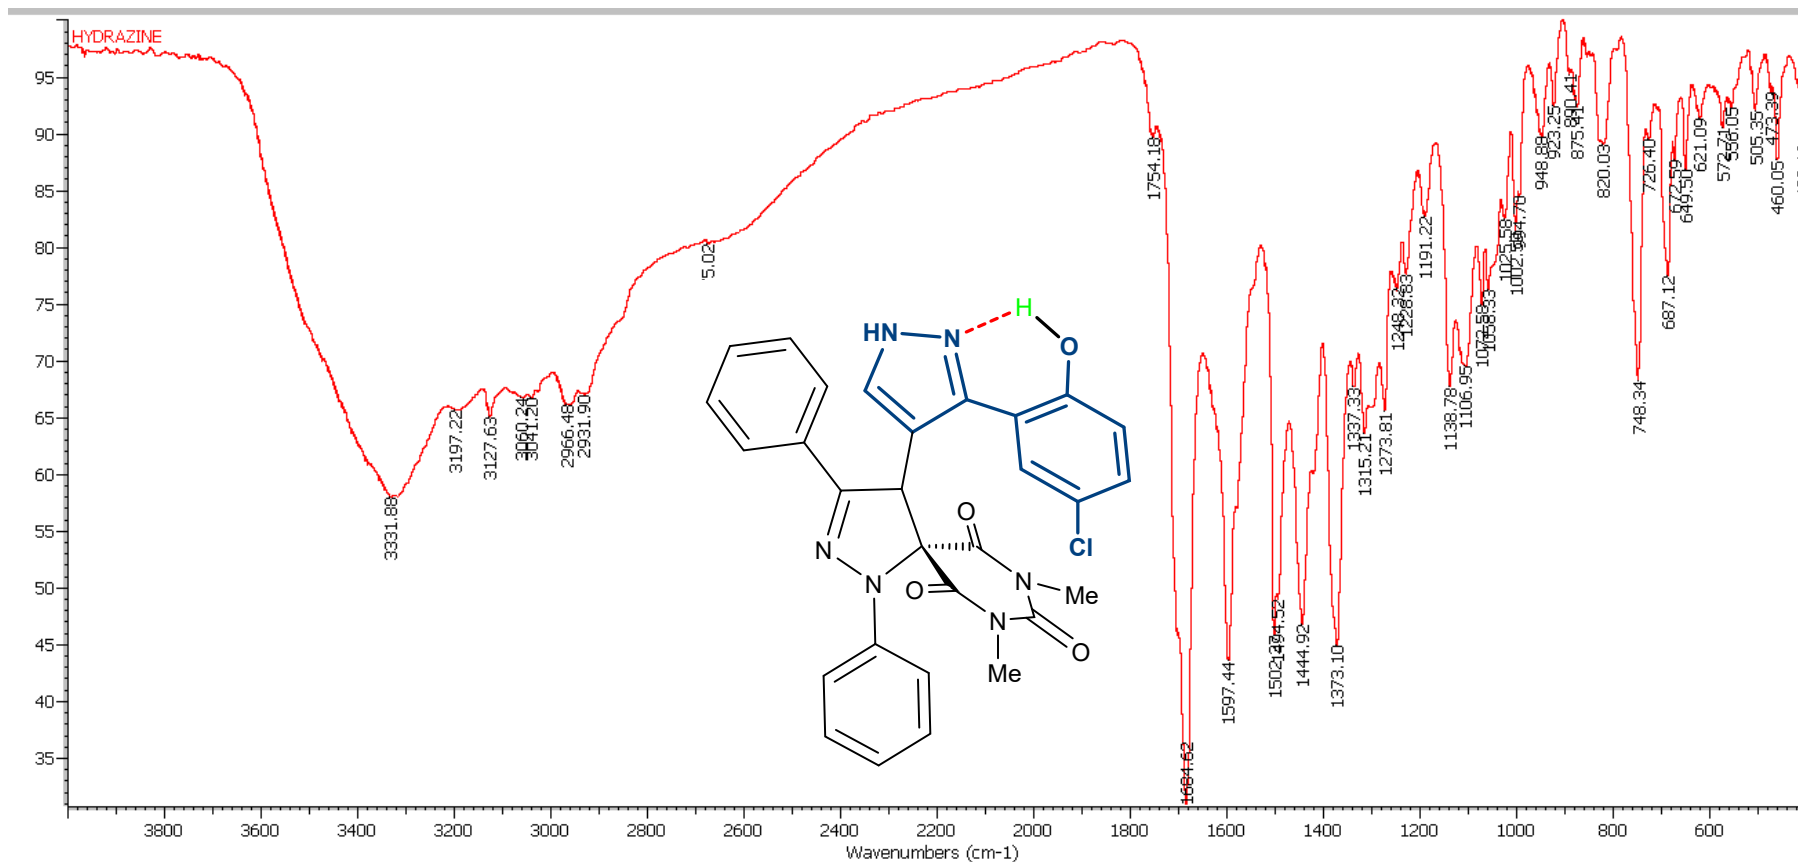

IR of 4e

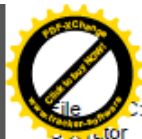

File: C:\MSDCHEM\3\DATA\Snapshot\HYDRAZINE.d

Operator:

Acquired: 21 Oct 2020 12:04 using AcqMethod default.597x.m

Instrument: Direct Probe

Sample Name:

Misc Info:

Vial Number: 1

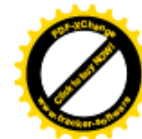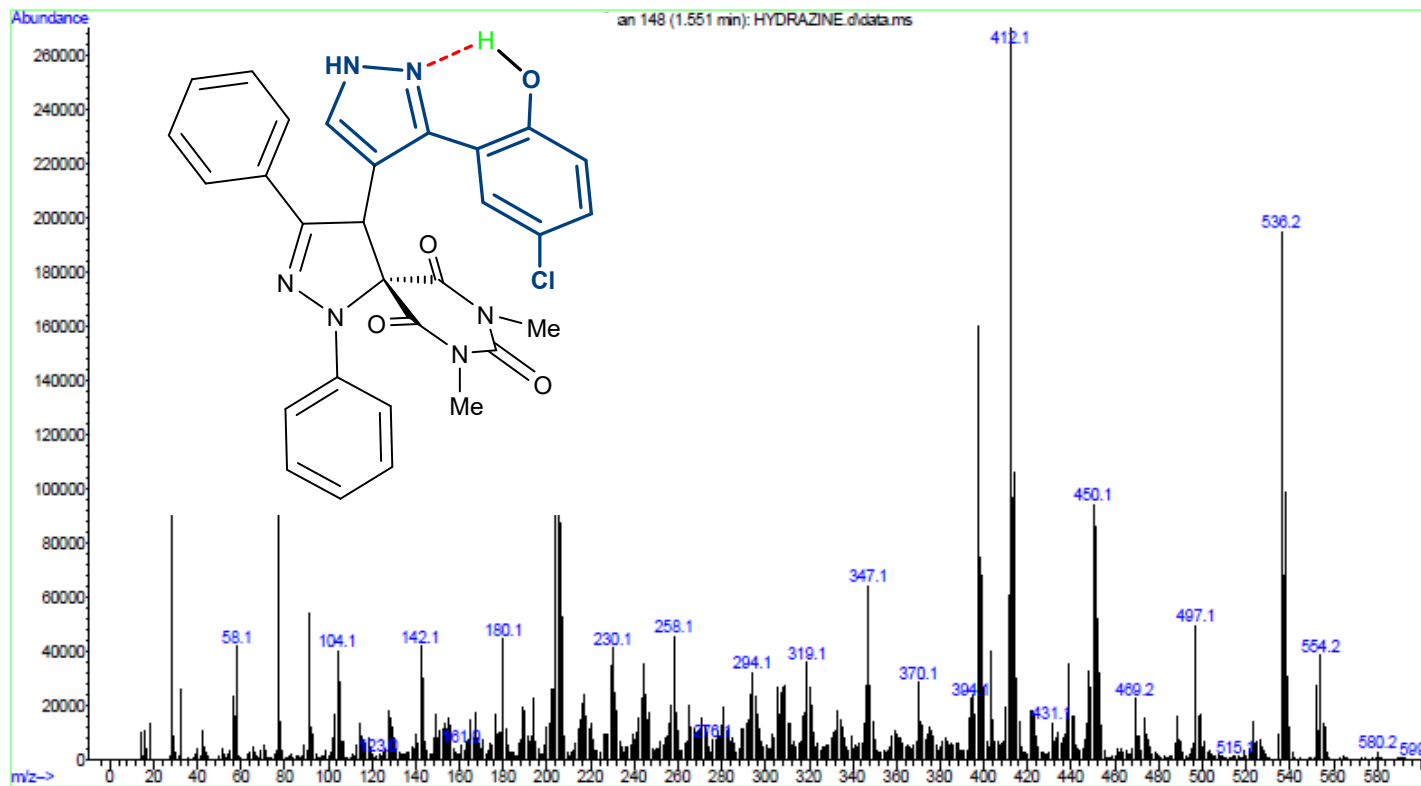

Mass of **4e**

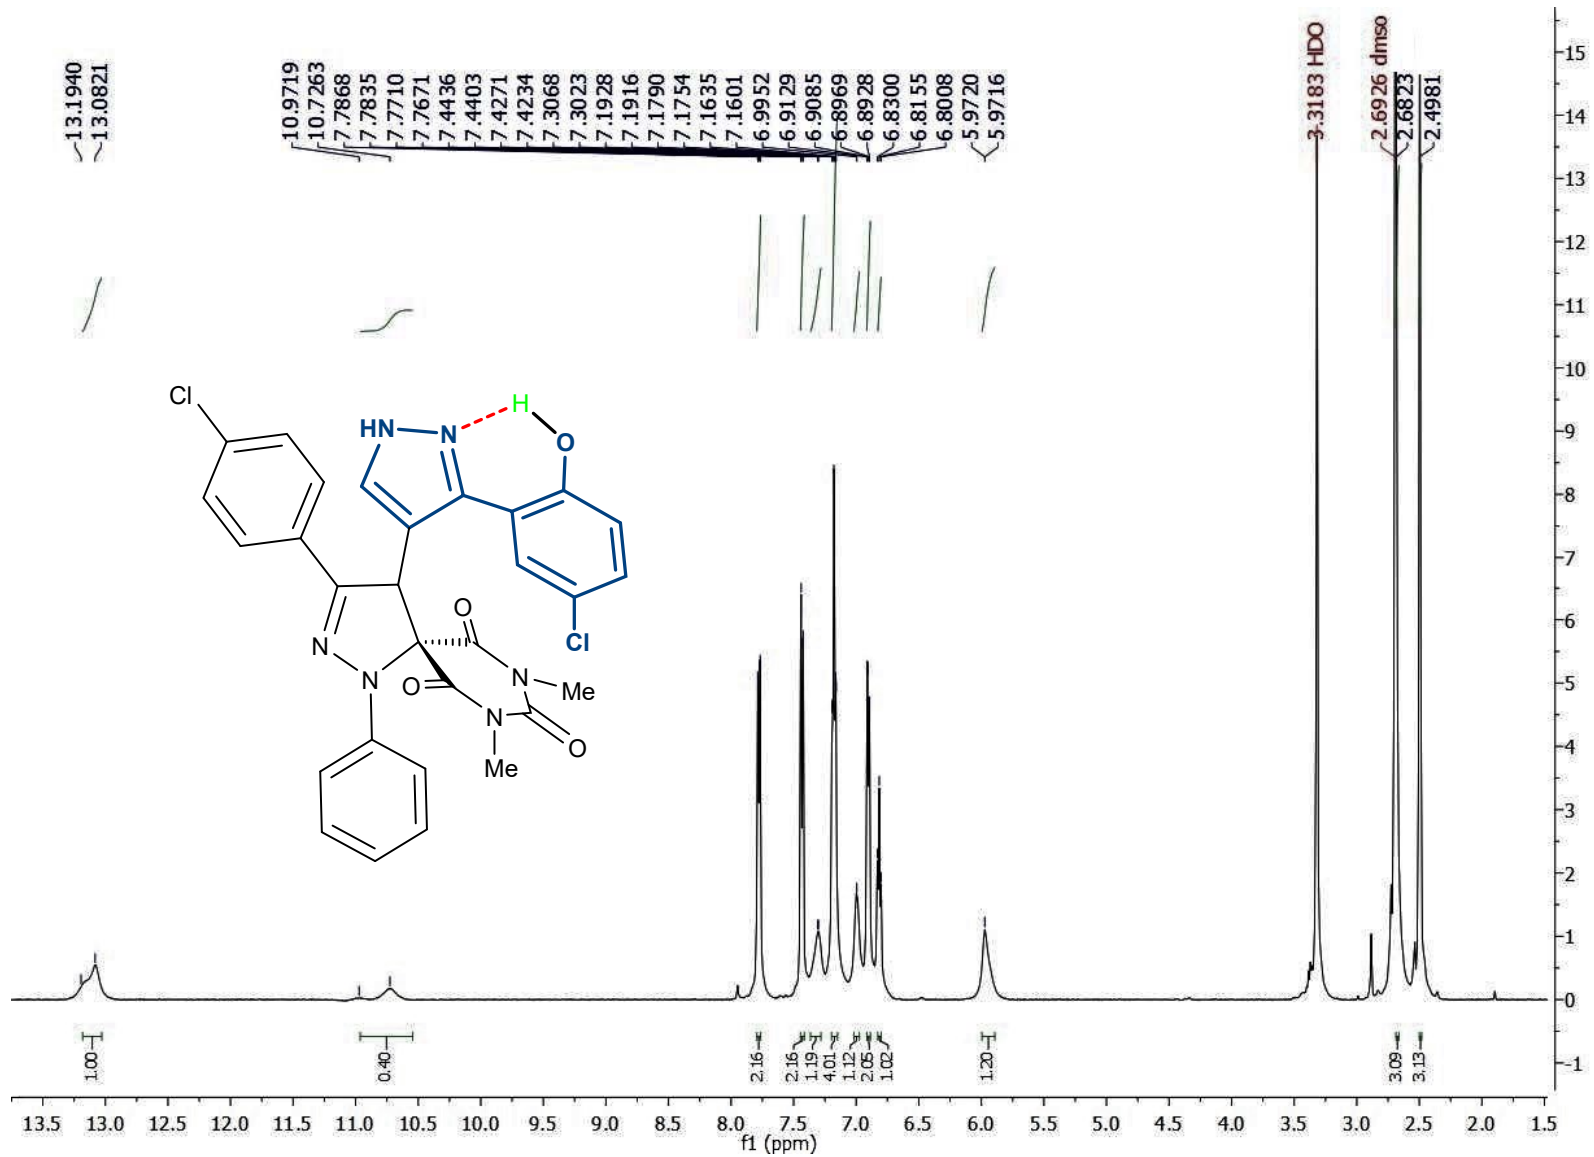

<sup>1</sup>H NMR (DMSO, 300 MHz) spectrum of **4f**

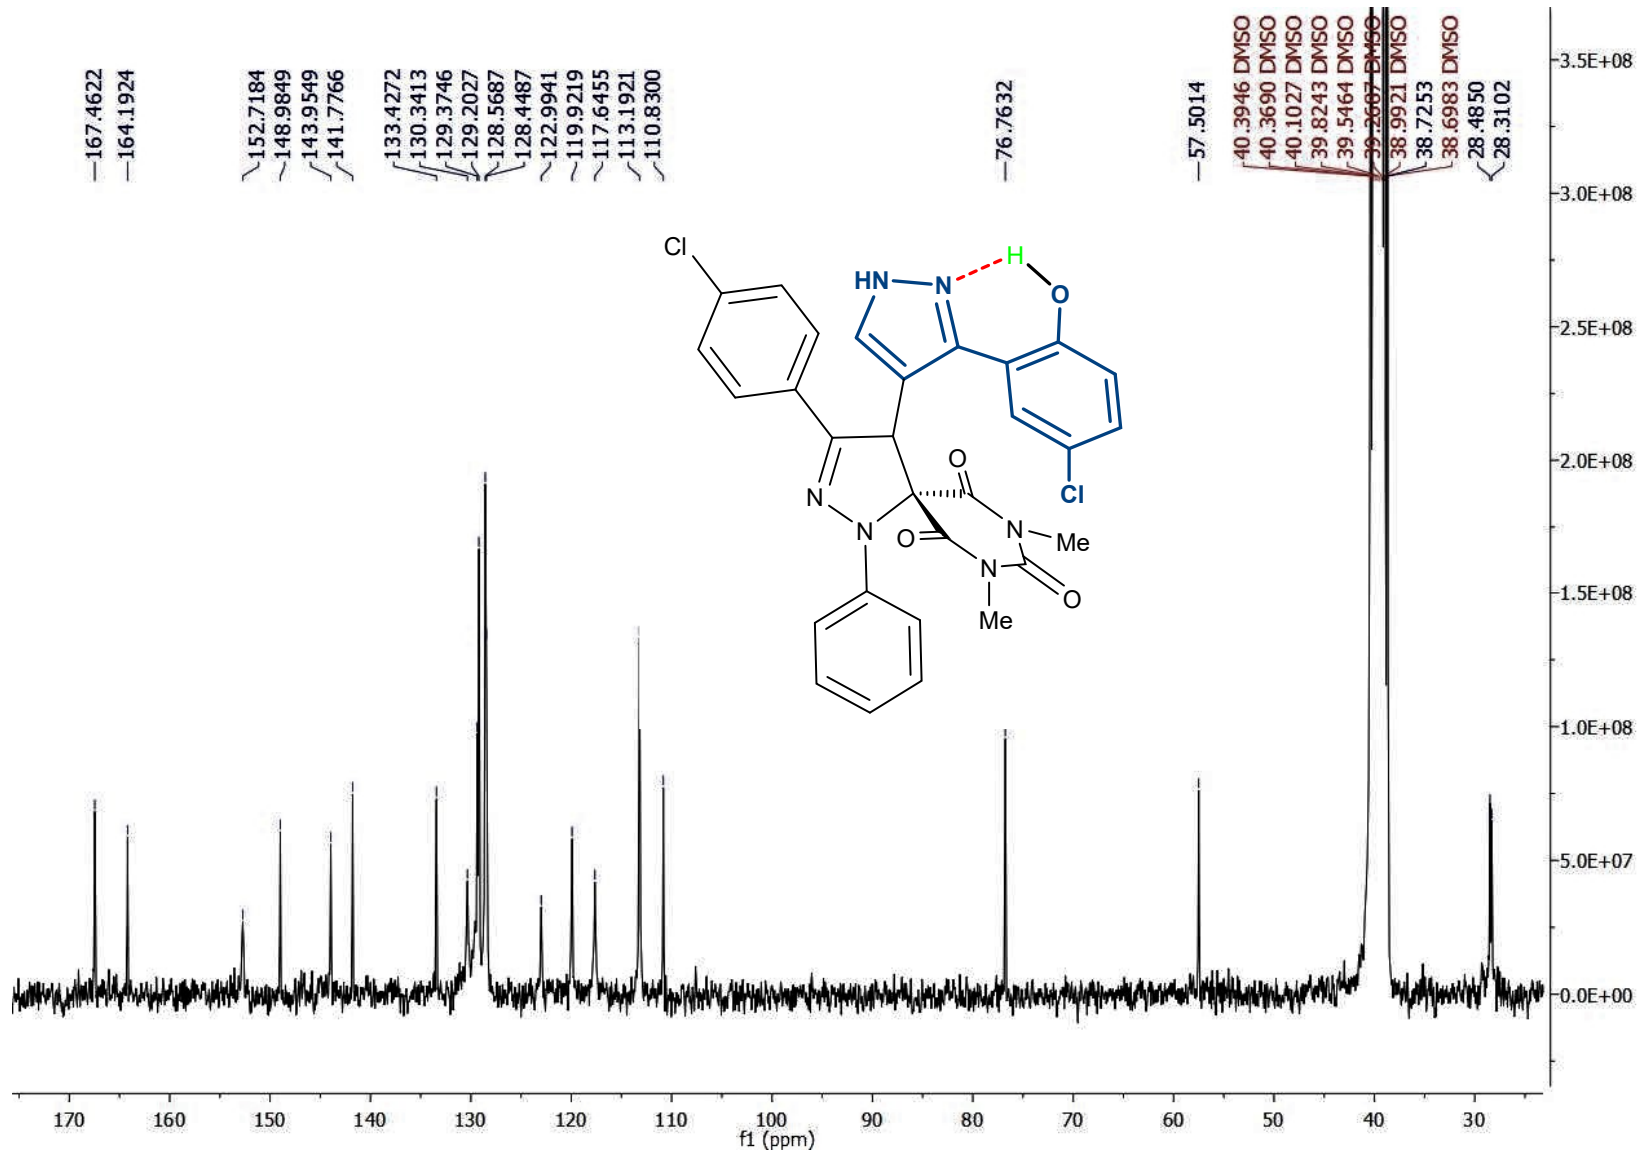

$^{13}\text{C}\{^1\text{H}\}$  NMR (DMSO, 75 MHz) spectrum of **4f**

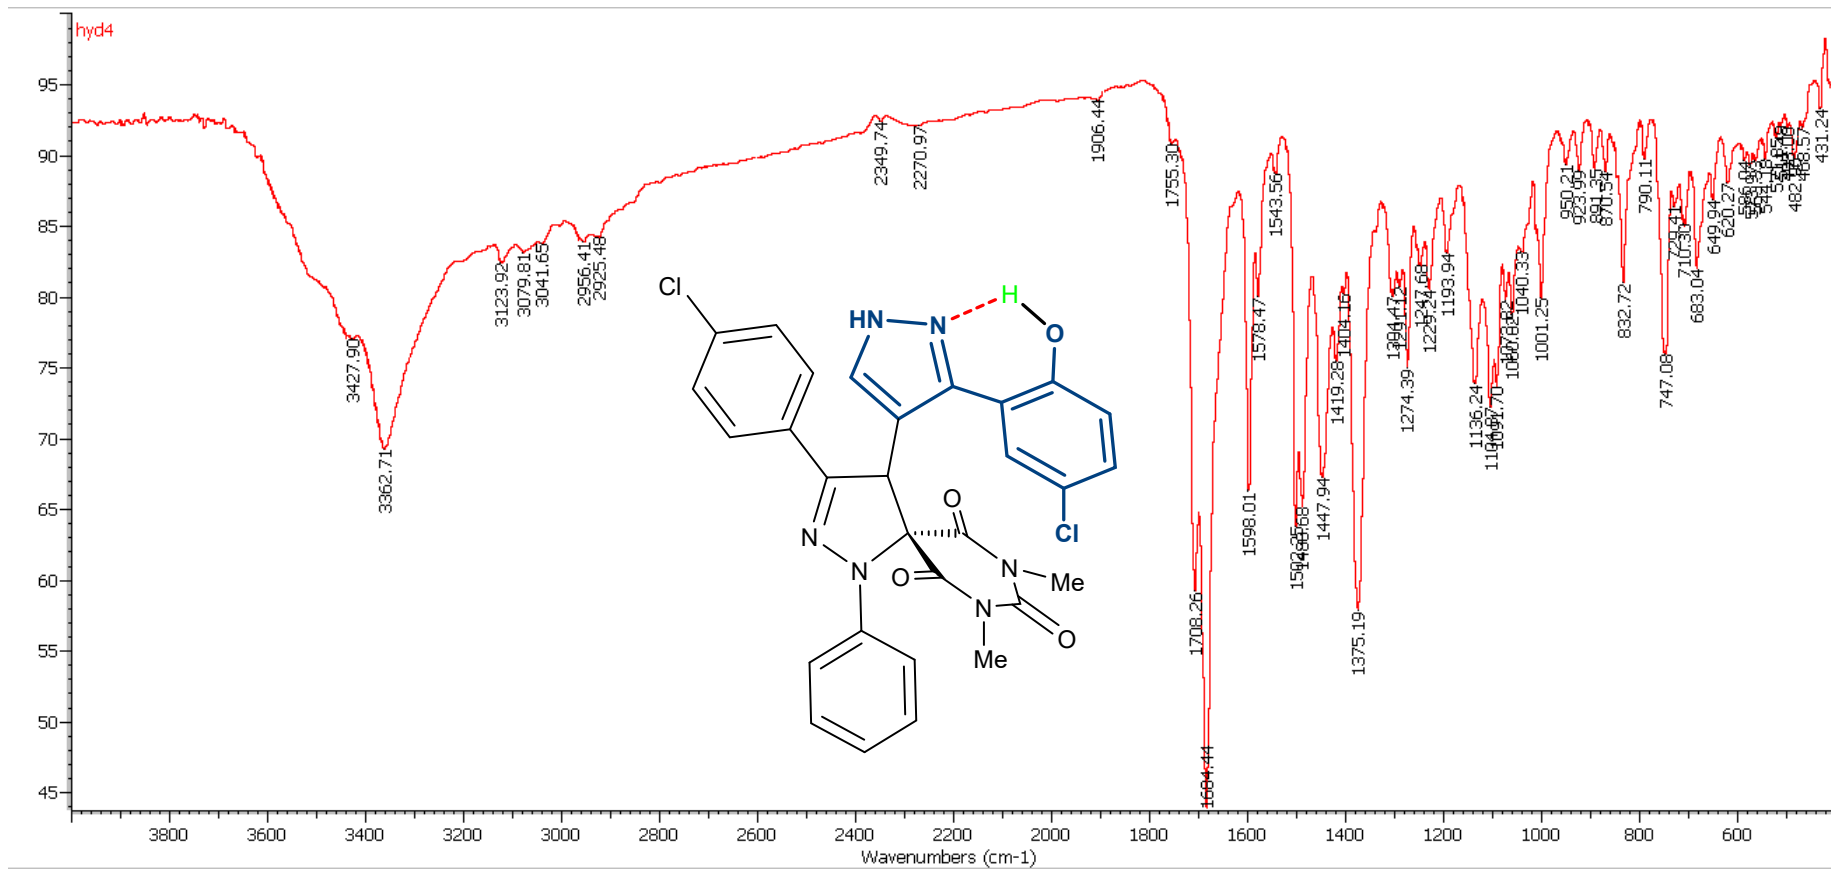

IR of **4f**



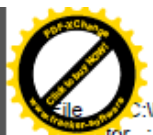

File: C:\MSDCHEM\3\DATA\Snapshot\HYD4.d

Operator :

Acquired : 13 Oct 2021 11:54 using AcqMethod default.m

Instrument : DIRECT PROBE

Sample Name:

Misc Info :

Vial Number: 1

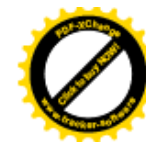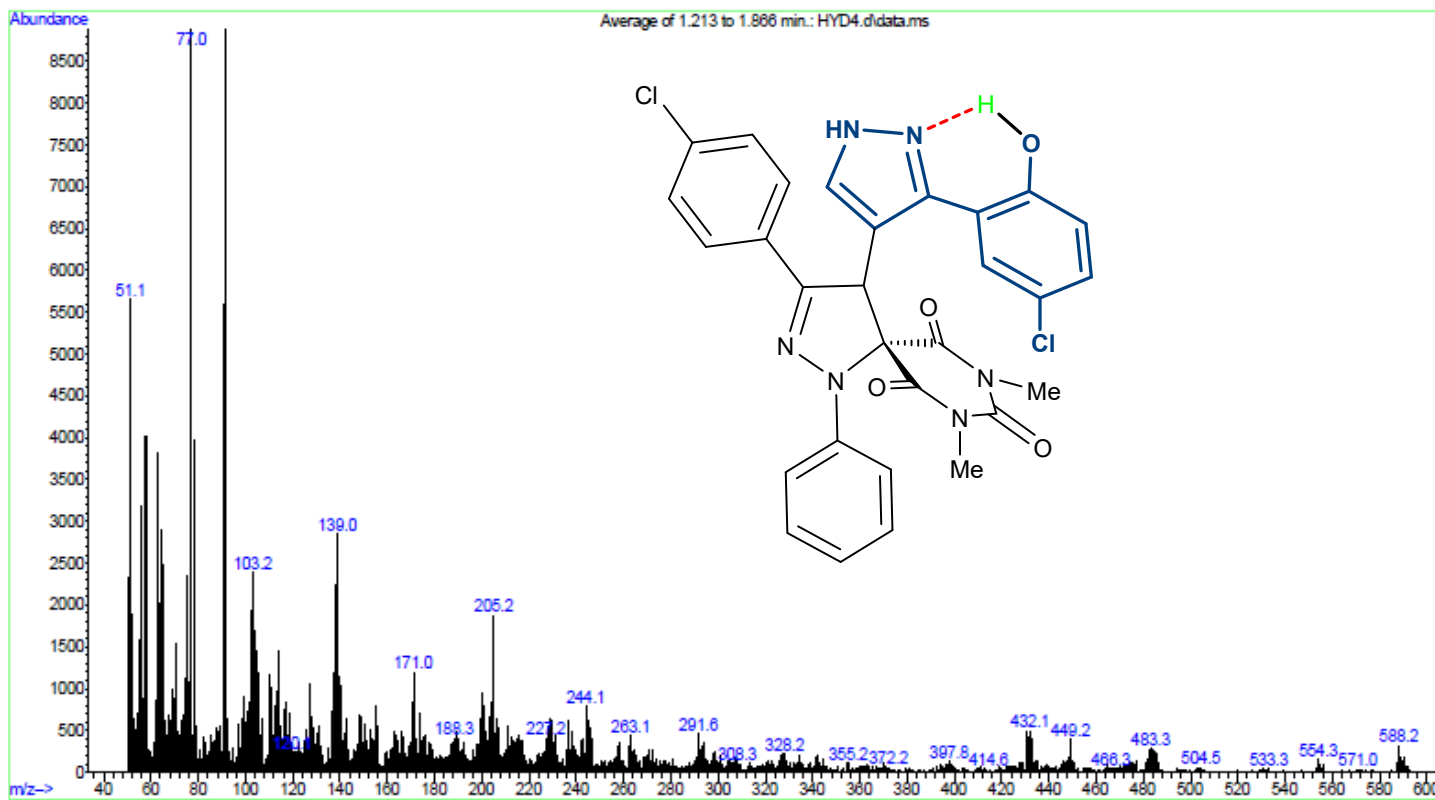

Mass of **4f**

S73



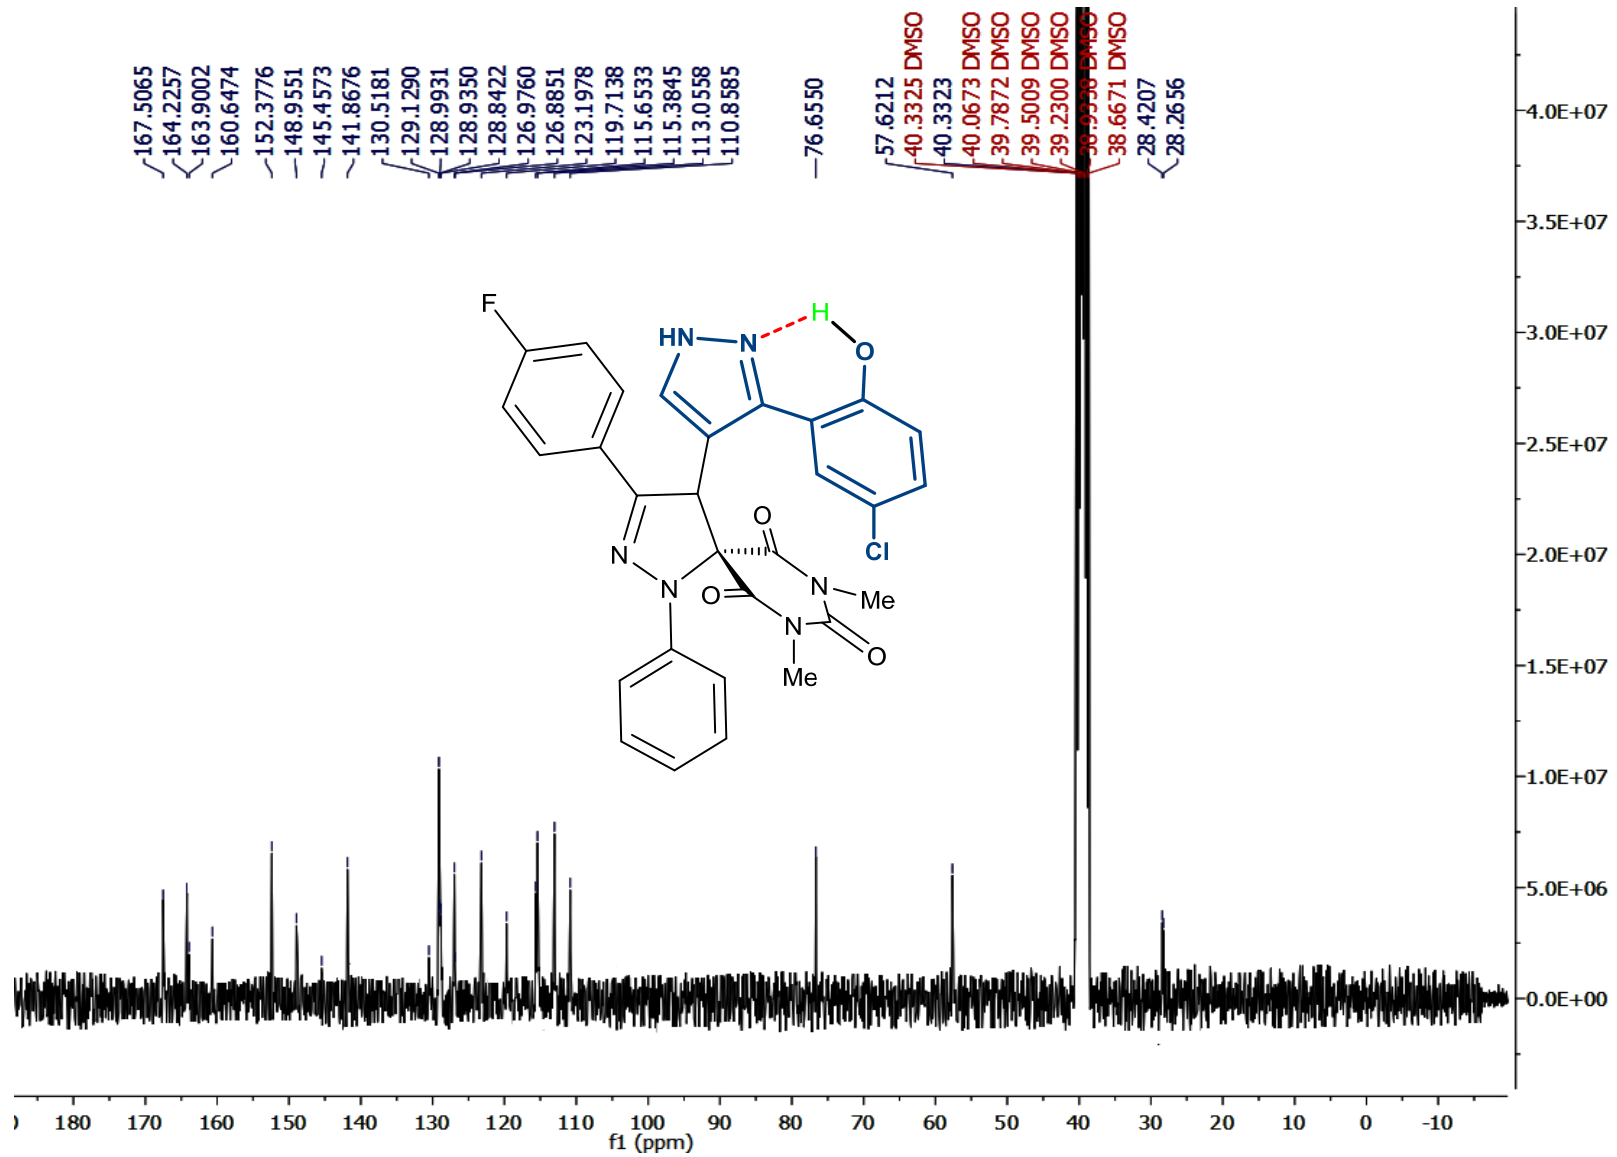

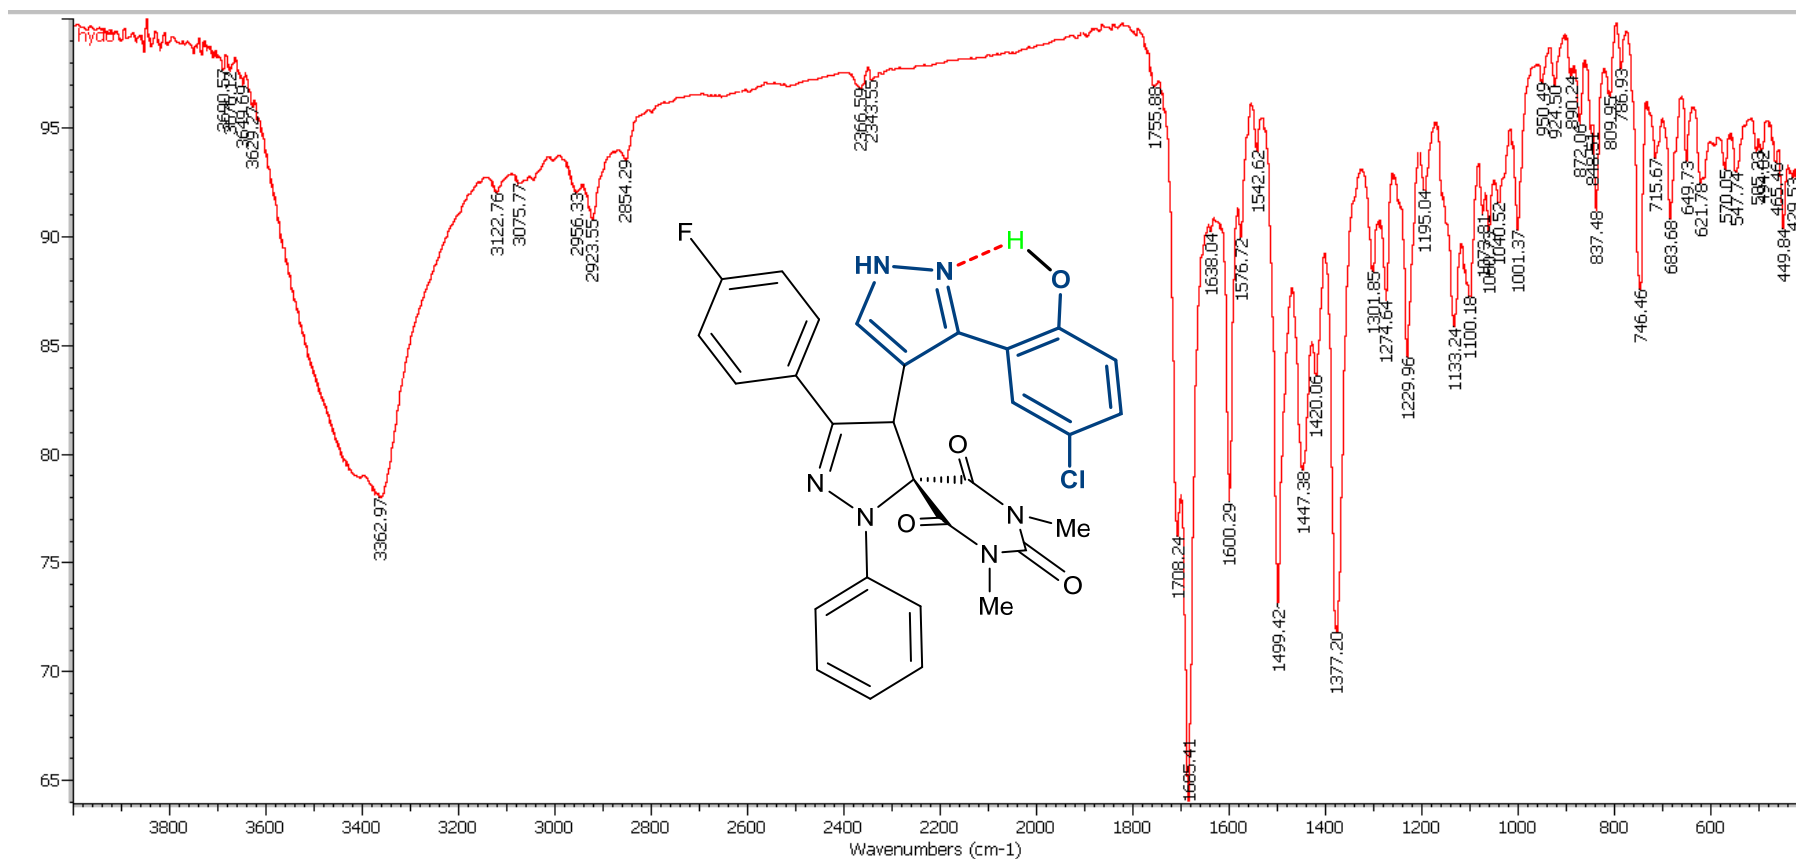

IR of 4g

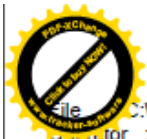

File: C:\MSDCHEM\3\DATA\Snapshot\HYD-6.d

Operator :

Acquired : 27 Jan 2021 10:57 using AcqMethod default.m

Instrument : DIRECT PROBE

Sample Name:

Misc Info :

Vial Number: 1

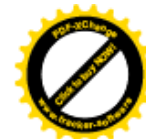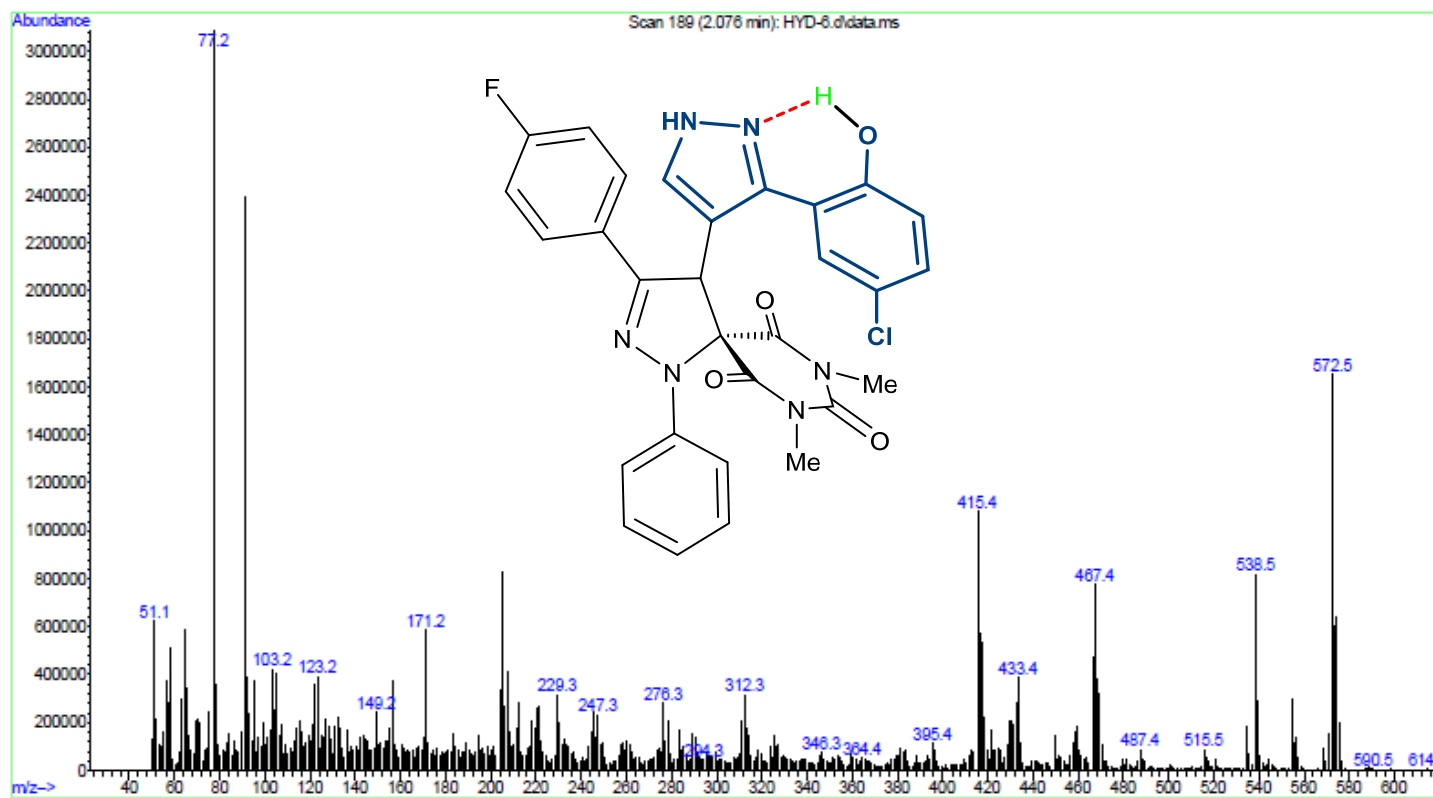

Mass of 4g

S77

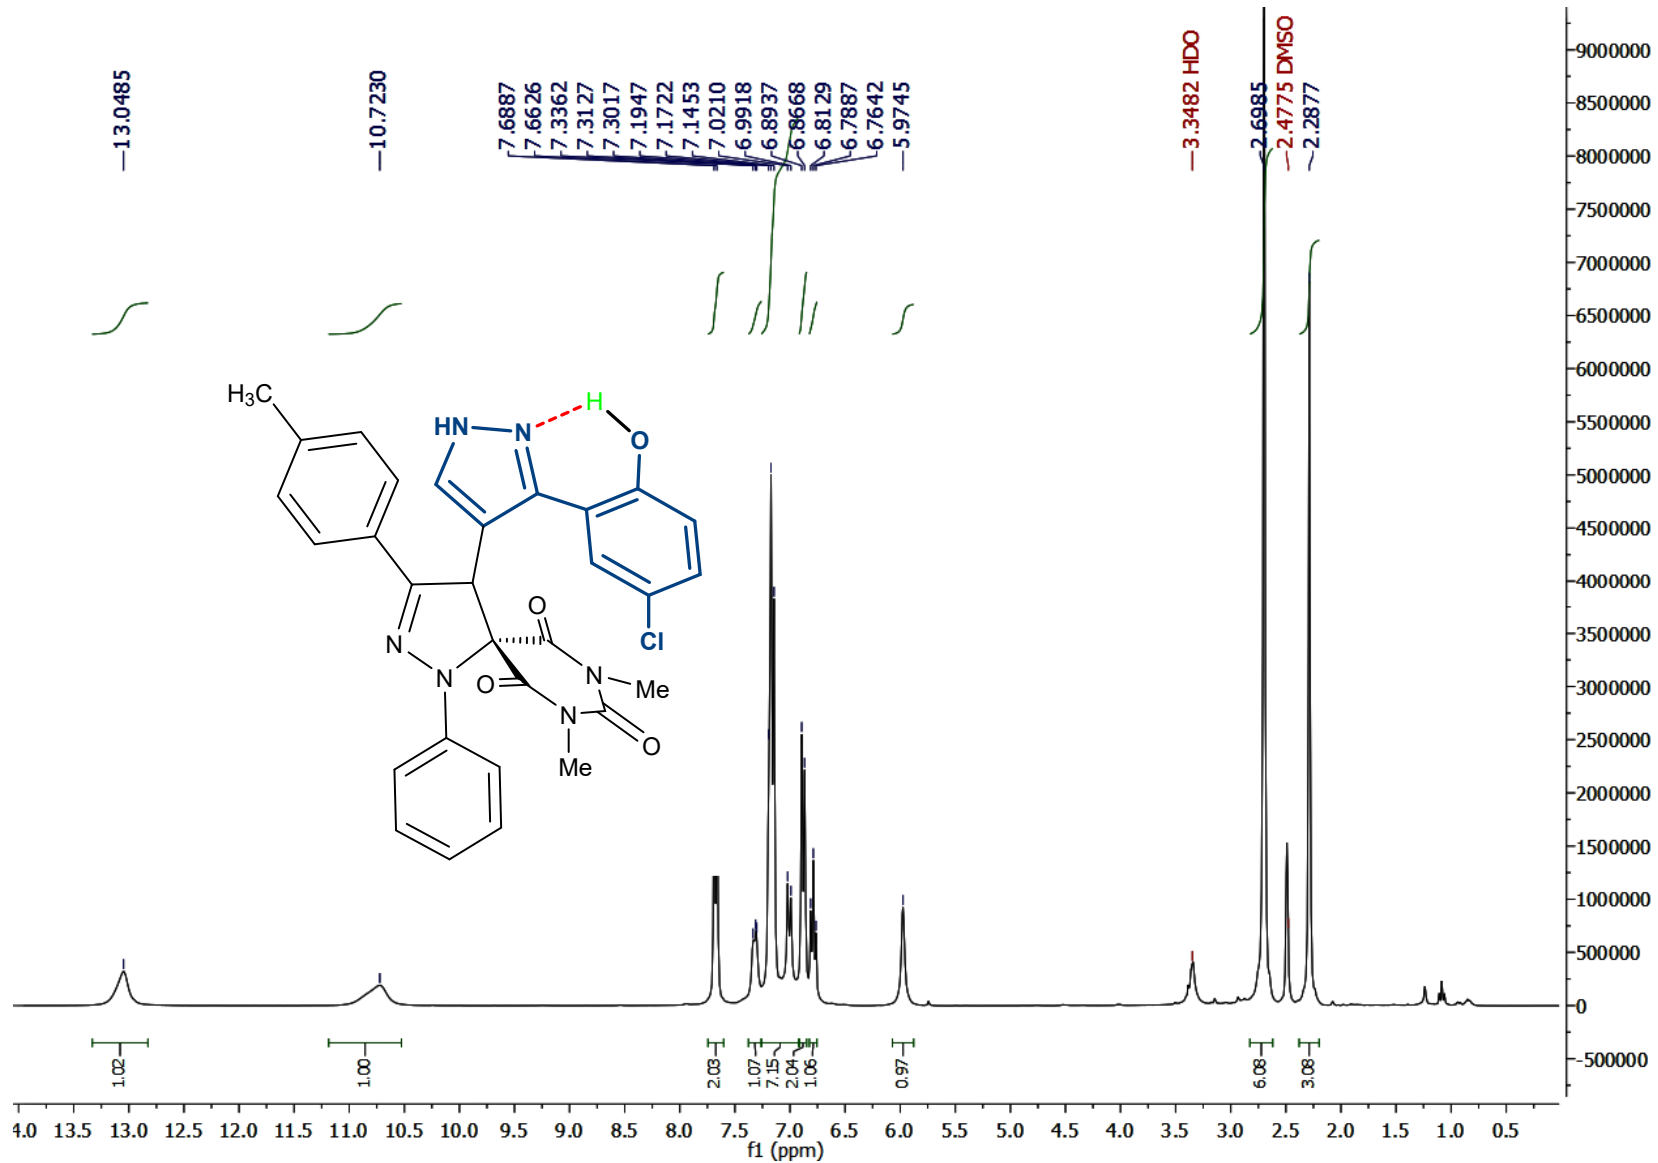

<sup>1</sup>H NMR (DMSO, 300 MHz) spectrum of **4h**

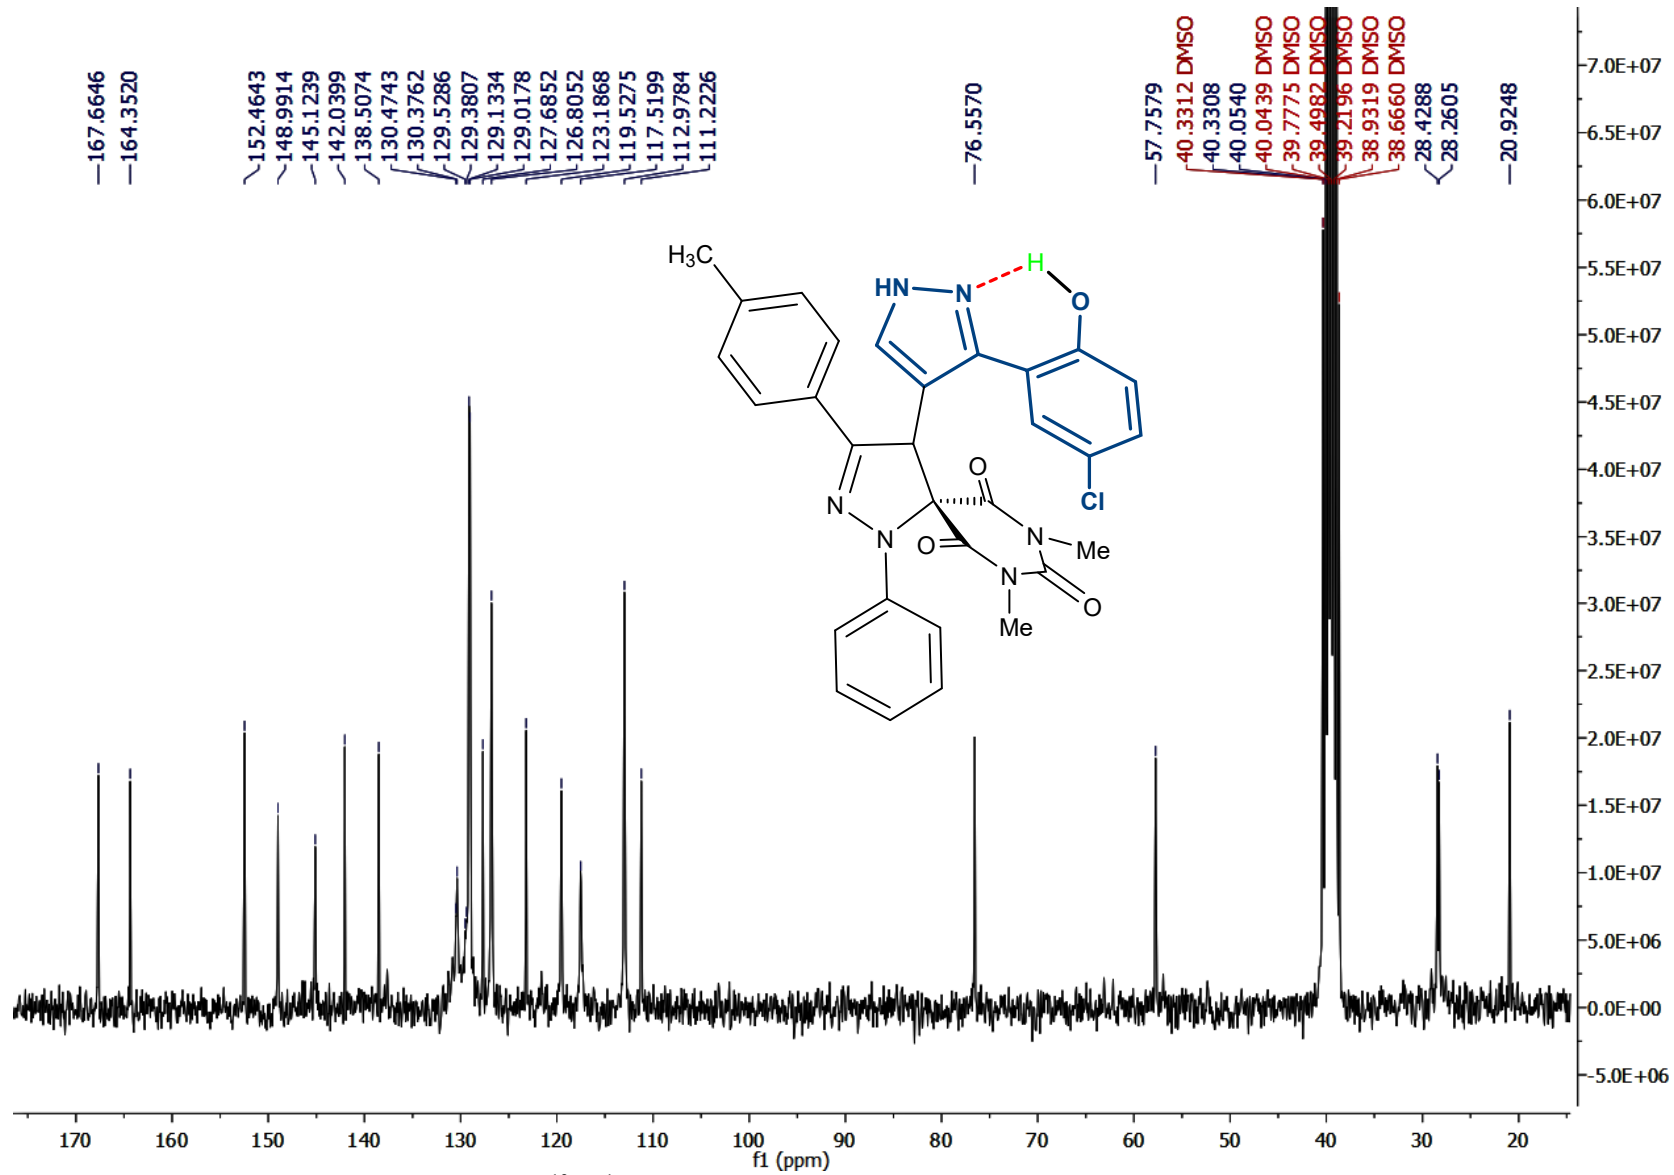

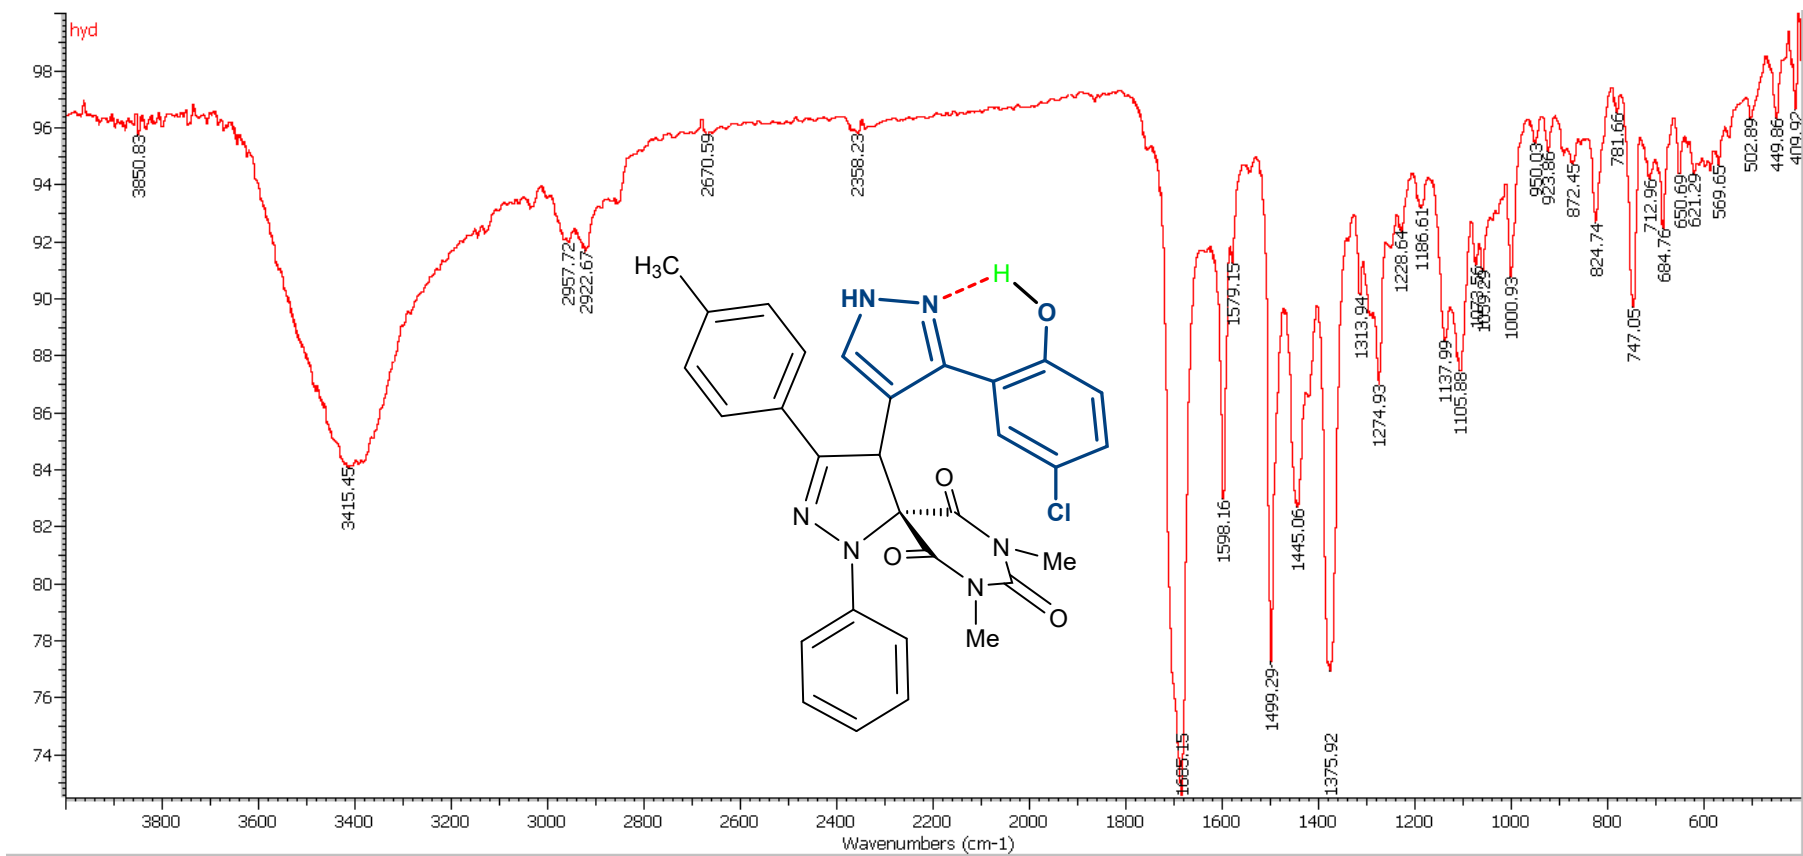

IR of 4h



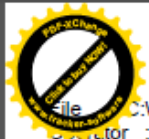

File: C:\MSDCHEM\3\DATA\Snapshot\HYD-7.d  
Operator :  
Acquired : 27 Jan 2021 11:02 using AcqMethod default.m  
Instrument : DIRECT PROBE  
Sample Name:  
Misc Info :  
Vial Number: 1

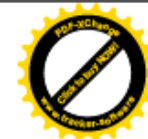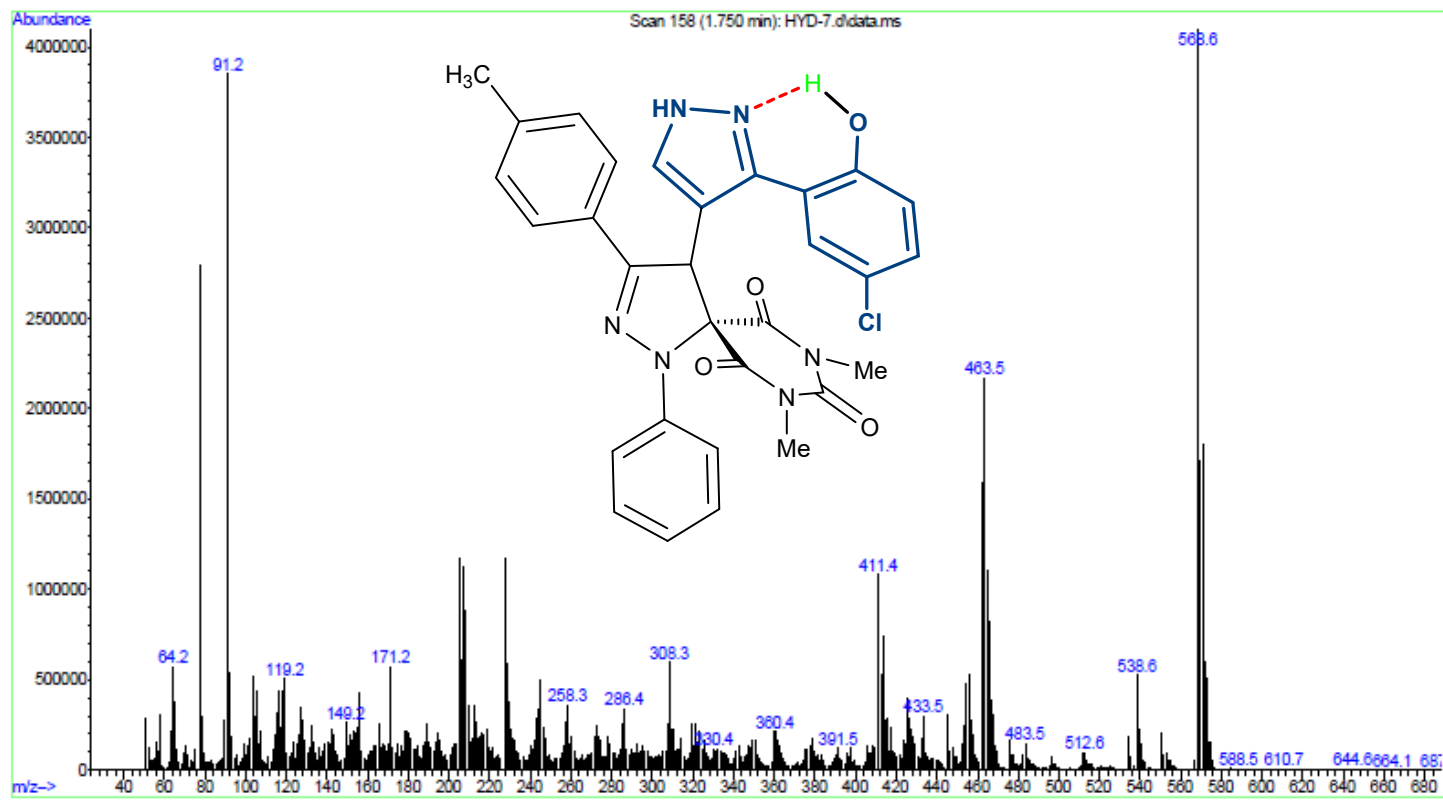

Mass of 4h

S81

## Crystallographic Data of 3d

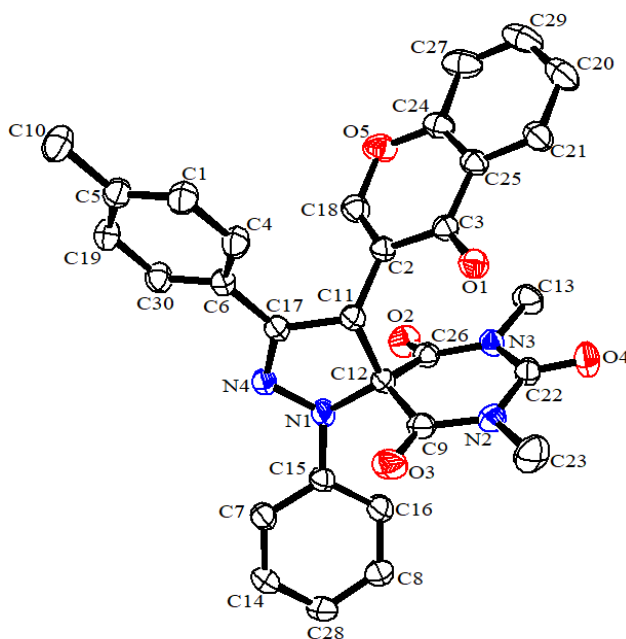

Ortep diagram of compound **3d**. The ellipsoid contour of probability level is 50%.

**Crystal growth:** 5 mg of compound **3d** was dissolved in a mixture of MeOH, ethyl acetate and DMF (2 mL), and single crystals were formed.

Crystal data for **3d** C<sub>30</sub>H<sub>24</sub>N<sub>4</sub>O<sub>5</sub> (CCDC 2064131): M<sub>w</sub> = 520.53, monoclinic, P 1 2<sub>1</sub>/n 1, a = 11.015(2) Å, b = 13.580(3) Å, c = 17.031(3) Å, α = 90.00, β = 96.63(3), γ = 90.00, V = 2530.5(9) Å<sup>3</sup>, Z = 4, D<sub>c</sub> = 1.366 mg/m<sup>3</sup>, F(000) = 1088, crystal dimension 0.55 × 0.5 × 0.4 mm, radiation, Mo Kα (λ = 0.71073 Å), 2.097 ≤ 2θ ≤ 25.902, intensity data were collected at 290 K with a Bruker APEX area-detector diffractometer, and employing ω/2θ scanning technique, in the range of -13 ≤ h ≤ 13, -15 ≤ k ≤ 16, -20 ≤ l ≤ 20; the structure was solved by a direct method, all non-hydrogen atoms were positioned and anisotropic thermal parameters refined from 4744 observed reflections with R(into) = 0.0293 by a full-matrix least-squares technique converged to R1 = 0.0566, and wR2 = 0.1814 [I > 2σ(I)].
